# Supplementary material for: Enhancing Landslide Susceptibility Mapping Through a Hybrid Model Utilizing Bivariate Methods and Convolutional Neural Networks
Source: Research Square preprint supplement (doi:10.21203/rs.3.rs-8051962/v1), 2025-11-25
Supplement: Supplementary file 1 [file 2d68d53a7b145ce3fdaa4bcc.xlsx]

## Sheet: Sheet1
FID	Elevation	Maximun	Slope	profile	plan	rainfall	NDVI	DTR	DTF	DTS	TWI
0	5201	308	38.6272	-0.152167	-0.133649	406.003	0.108349	5930.1	5848.13	11824.3	6.29441
1	5268	621	49.7279	-0.0282351	-0.0479882	405.824	0.187324	6559.94	4724.84	10827.1	7.17561
2	5271	482	54.8703	-0.0740741	0	405.817	0.138004	6346.36	5085.58	11175.2	6.9934
3	4892	115	32.0963	-0.0535925	-0.0788717	406.352	0.120269	5621.39	6138.69	11802.4	6.40857
4	5196	528	53.8959	-0.0933331	-0.0220025	406.029	0.174439	6967.59	2749.53	7123.04	6.48315
5	5214	314	34.3011	-0.122826	0.124087	408.881	0.212457	4435.06	4872.59	4532.57	6.1151
6	5197	660	48.0931	-0.00269635	-0.0249186	417.828	0.191427	2409.95	16773.9	11844.5	6.89295
7	5265	426	32.5668	-0.102646	-0.0141689	417.067	0.223156	5646.74	1058.56	14164.1	7.0359
8	4922	588	54.7458	0	0.0308642	426.578	0.196153	184.627	8673.1	9090.3	10.5525
9	5109	485	33.5713	-0.0603422	-0.0171323	420.464	0.158962	2565.17	11679.2	5142.86	7.36423
10	5153	314	37.1705	-0.104136	-0.0412851	421.023	0.141806	2847.67	11704	5750.44	7.17448
11	5267	430	30.4037	0.00198007	0.0038794	439.194	0.351611	6404.87	13418.2	6615.23	10.5676
12	4991	61	18.2858	-0.0037375	0.0101046	430.676	0.125549	14974.2	27831.8	301.564	8.2608
13	5330	488	39.789	-0.360805	0.0367262	496.59	0.062916	16179.7	26391.6	12286	5.51541
14	4880	499	42.8709	-0.0591728	-0.0573209	506.501	0.00840258	15352.3	20424.2	13044.5	6.0007
15	5120	295	30.0252	0.149999	-0.0393014	511.103	0.0280481	6674.95	5447.78	8141.44	9.02813
16	5010	522	34.7423	-0.0492572	-0.045329	512.579	0.0314663	6918.27	5298.27	8525.25	6.3958
17	4943	159	32.4445	-0.098294	-0.204467	516.252	0.315201	7002.49	4514.38	7969.05	7.54999
18	4905	505	37.2734	0.0296752	-0.0859253	516.848	0.473723	6643.32	4144.15	7498.57	8.40081
19	5129	556	47.3175	0.0219517	0.000346807	517.702	0.464931	6642.31	4168.12	7474.67	7.40846
20	5053	209	38.3315	-0.0402524	-0.0548427	540.024	0.51592	4047.59	1909.09	6662.15	7.19481
21	4942	547	37.6502	-0.0499267	-0.161038	508.25	0.0283855	10531.8	16609.8	7210.04	6.70001
22	4729	28	17.3082	0.0125272	-0.100586	530.047	0.0382178	9563.68	15389.1	2439.15	7.438
23	5183	300	30.8568	-0.0199812	-0.0143696	643.349	0.382437	7862.66	8770.27	4622.21	7.04661
24	4913	38	15.165	-0.0335051	-0.0437932	663.558	0.158962	8716.24	5825.75	6891.16	6.68275
25	4919	611	44.1093	-0.0568417	-0.0367799	786.802	0.157594	25296.1	21334.8	4841.77	7.76761
26	4808	85	14.163	0.00700818	0.0162674	788.228	0.157594	25473.6	21484.4	4912.91	8.15523
27	4997	0	4.29898	-0.0236578	-0.0450569	807.785	0.420564	25169.1	22305.2	3716.95	7.39013
28	5407	481	45.806	0.0252116	-0.0759054	705.367	0.515813	9919.75	10106.7	1073.37	6.79908
29	4997	50	16.1296	0.141736	-0.109036	719.802	0.357276	11116.5	12060.4	1947.72	7.68813
30	4769	222	49.9872	-0.0275094	-0.0432844	724.091	0.338107	11197.1	12517.6	1526.8	6.65492
31	4791	206	23.7476	-0.0744682	-0.0868139	814.993	0.199381	22612.7	22429.6	1917.17	6.56609
32	5069	173	25.833	-0.0562853	-0.0538162	818.204	0.14016	23188.1	22701.1	2603.7	7.02546
33	4810	71	16.4941	-0.0468755	-0.232061	811.26	0.125961	22725	24074.9	3339.89	5.96142
34	4923	456	43.7112	-0.0552169	-0.0318973	751.692	0.0933347	17697	18777	7877.14	7.00102
35	4899	563	37.7872	0.034511	-0.0469705	752.757	0.0884542	17848.5	18961.1	8020.02	7.44735
36	4809	254	40.8177	-0.204349	-0.103114	814.967	0.199381	23983	25593.1	4781.8	5.44479
37	4782	149	21.4077	0.00620196	-0.170753	814.334	0.0952524	24157.2	25980.2	4338.36	7.7815
38	4877	261	30.7427	-0.0526913	-0.019358	815.588	0.0810379	24407.4	26215.4	4451.22	6.51832
39	5309	443	33.7152	0.0499281	-0.040019	405.394	0.186869	7843.37	2718.48	8555.2	7.26005
40	5154	539	47.8557	-0.304668	0.158295	412.165	0.0515238	2942.87	13818	16150.2	6.51981
41	4685	145	48.8826	0.105755	0.0563727	412.321	0.0805048	2693.68	13874.3	15987.5	6.50127
42	5112	66	14.5241	0.00271616	-0.0134282	405.617	0.173192	7675.53	2899.22	8407.62	6.73149
43	4948	454	38.4272	0.00798926	-0.00127	405.672	0.170275	7680.06	3016.95	8481.21	7.83583
44	5117	173	20.5383	0.11511	0.0441222	405.375	0.142174	7596.68	2193.44	7804.36	7.31433
45	5161	264	28.6517	-0.033805	-0.0245458	407.927	0.195292	5348.06	4074.39	5443.61	7.31842
46	4809	189	22.7821	0.0360071	0.0540112	420.557	0.0741262	5385.31	18884.9	8894.42	6.98151
47	4981	438	40.9181	0.00685871	0	426.966	0.196153	348.635	8728.16	8930.36	9.85242
48	4836	534	50.9563	0.0385902	0.0287136	419.112	0.211873	3027.47	10917.9	4272.64	7.48087
49	5177	427	27.2245	0.281193	-0.022511	462.165	0.0137144	17252.6	24169.4	13554.7	6.96491
50	5019	223	26.2547	0.0664605	0.0366252	493.505	0.103228	16460.1	28030.1	12018.5	6.84513
51	5012	90	28.2628	0.0636238	0.0142411	493.237	0.102687	16208.9	27809.4	11821.1	5.54999
52	4691	418	43.6293	-0.0804219	0.00831266	455.983	-0.00604578	13196.5	24899.3	10739.4	6.37548
53	5079	601	40.3431	-0.00792959	0.0488605	514.786	0.0485881	7145.09	4788.62	8306.01	7.54696
54	4898	347	34.6194	0.0365682	0.0320788	514.16	0.105658	7029.98	4658.16	8175.8	6.23612
55	4641	393	48.6206	0.0261993	-0.0540476	572.649	0.328993	5110.27	2633.08	4294.93	6.79937
56	5101	491	35.697	-0.0360982	-0.107323	543.975	0.0215711	12814.5	15412.5	5316.58	5.88697
57	4629	371	45.2597	-0.295865	-0.0273466	550.903	0.0294168	13412.5	14657	5598.82	5.98295
58	4588	155	43.2809	0.519976	0.0940498	560.491	0.0490115	12052.4	12685.2	5047.92	6.41362
59	4927	545	54.8311	0.0360617	0.138942	561.067	0.077109	11577.1	12263.7	4604.86	6.2865
60	5238	473	42.4729	0.352654	-0.181738	562.731	0.0784857	11261.6	11929.8	4498.6	6.34933
61	5077	326	31.2933	0.00733826	0.014197	709.828	0.311276	14016.3	11229.6	4165.67	6.67377
62	5219	368	28.6956	0.256568	-0.154954	671.09	0.186252	6589.35	4705.07	5174.53	6.50645
63	5160	283	26.2649	0.00234215	0.0426714	744.352	0.184658	17206.5	17951.4	7535.41	7.41441
64	5156	474	42.1089	-0.00147783	0.120436	755.095	0.0884542	18187.3	19352.3	8019.29	5.87513
65	5125	547	51.6654	0.0824927	0.0989536	791.978	0.0850788	24475.4	26385.4	3277.46	6.52075
66	5195	834	54.7572	-0.100001	0.0481469	409.626	0.0588188	5356.27	12832.9	17170	6.53879
67	5188	896	52.6873	0.0257649	0.00647474	409.941	0.0542403	5337.32	13240.2	17436.3	6.83319
68	5203	828	53.5889	-0.0274514	-0.0776058	409.881	0.0519453	5206.42	13010	17192.4	6.82419
69	5205	573	64.7502	0.0218638	0.0225136	409.161	0.178202	5239.68	12024.5	16491.4	7.18156
70	5289	31	12.9323	0.0918542	-0.093331	409.37	0.166932	5031.94	12059.2	16373.5	8.47636
71	5134	226	27.5298	-0.00974265	0.0279117	409.183	0.143911	5527.33	12370.9	16951	7.45771
72	5199	279	30.752	0.0176737	0.0400605	408.445	0.235441	5712.54	11524.5	16444.5	7.08802
73	4688	779	59.452	0.00430353	-0.0238172	409.133	0.1822	5230.58	11967.4	16432.7	8.94833
74	5324	465	35.5696	0.0254868	0.00326461	409.275	0.235506	4891.61	11776.9	16050.1	8.67759
75	5049	111	29.8646	0.0198163	-0.00269637	408.575	0.220889	5318.64	11245.9	15982.8	7.41764
76	5456	434	46.0249	-0.00896505	0.00739297	408.266	0.212596	5337.3	10907.5	15801.2	6.72823
77	5246	641	48.443	-0.136192	0.144673	409.735	0.0995509	5027.48	12638.3	16806.5	6.48192
78	4833	980	45.9977	0.0295838	0.0424663	409.558	0.125894	4931.03	12263.9	16458.5	7.07629
79	5279	396	40.5327	0.0174243	-0.017849	409.356	0.211403	4741.09	11671.7	15853.1	11.8433
80	4425	900	50.1951	0.00644954	0.00111087	408.321	0.242226	5139.22	10724	15539.4	7.84762
81	5173	414	35.5684	-0.0138085	0.0296953	408.173	0.270936	5141.13	10475.5	15380.8	7.28907
82	5551	523	51.0827	-0.0223098	0.0266472	409.993	0.0833766	4863.86	12802.5	16810.8	6.55417
83	4626	1007	50.4357	0.0320556	-0.0379033	409.688	0.13963	4703.1	12184.3	16238.8	9.43442
84	4404	405	64.3787	-0.0241314	-0.0466441	410.358	0.0714381	4744.93	13095.7	16937.1	7.57083
85	4803	869	52.3317	0.012442	-0.0103788	410.116	0.109002	4562.24	12687	16513	7.63362
86	5550	416	42.1536	-0.0210831	0.00155065	409.542	0.20731	4608.46	11864	15915.5	9.65201
87	4786	737	54.3129	-0.00228458	0.000486903	408.13	0.286941	5018.14	10319.5	15185.4	7.17339
88	5172	963	51.5348	0.0347671	-0.0109119	409.177	0.215472	4715.67	11398.6	15639.3	10.0201
89	5367	16	10.5696	0.0373375	-0.0231563	409.229	0.21834	4536.55	11271.2	15430.2	9.00169
90	5195	650	54.1455	-0.0712508	-0.038329	407.535	0.270153	4864.05	9107.45	14188.7	6.29642
91	4883	828	44.2431	-0.0478273	-0.0335823	407.704	0.270537	4823.56	9378.98	14368.2	6.91399
92	5326	202	35.0676	-0.0521293	-0.0204599	407.607	0.200589	4740.1	8989.68	13989.2	6.62482
93	5302	317	38.9892	0.0318012	0.00710989	407.804	0.131269	4505.72	9013.15	13809.4	6.89729
94	4392	281	50.7037	-0.00736241	0.00895152	410.608	0.0517899	4930.99	13632.7	17418.5	6.71481
95	4803	787	45.3474	-0.0272373	-0.0243883	411.073	0.0457525	4500.36	13814.5	17242.4	6.64106
96	5247	671	49.7429	0.015172	0.0254601	410.407	0.0975641	4426.38	12861.2	16543.6	7.78284
97	5119	604	62.4516	0.0199139	0.0134162	410.385	0.0980889	4305.39	12813	16427.9	7.38096
98	4496	387	57.0532	0.0175204	-0.0159893	410.578	0.104615	4136.28	12830.6	16319.5	7.6371
99	5610	470	53.0257	0.0250858	0.0215585	409.66	0.20731	4368.88	11708.8	15605.5	7.58064
100	5068	251	45.6022	0.0172931	0.0761725	407.631	0.0925868	4576.07	8720.12	13614.6	6.16784
101	5213	690	48.892	-0.0381417	-0.0438001	407.401	0.161098	4757.01	8516.72	13590.2	6.90259
102	5076	914	66.7511	-0.0723654	-0.0459104	407.948	0.0800352	4240.16	8824.43	13408	6.68114
103	4579	209	44.1833	-0.130917	-0.112399	406.957	0.273311	5125.41	8178	13616.2	6.52317
104	4820	336	44.7334	-0.0614071	-0.0234204	407.18	0.181552	4909.16	8331.1	13560.5	6.49244
105	5379	324	43.0143	-0.141838	-0.0314125	407.26	0.130449	4810.9	8191.6	13339.7	6.67443
106	4819	222	29.791	0.00559362	0.038927	410.879	0.124053	3926.96	13024	16315.5	7.39453
107	5007	338	43.7221	-0.0440177	-0.0312605	405.95	0.108522	6077.77	5646.06	11731.7	6.6212
108	5287	493	44.4147	-0.165118	-0.100303	406.74	0.0800352	5287.1	7103.96	12671.6	6.31542
109	4607	649	56.6389	-0.0391751	0.0171212	406.854	0.0958899	5036.54	7268.72	12578.2	6.6907
110	5249	596	54.6861	-0.0313679	-0.00592836	406.659	0.0964502	5249.54	6934.11	12422.4	6.38598
111	5383	336	42.0107	-0.0333441	-0.0199696	406.605	0.0971294	5319.79	6706.16	12215.4	6.10515
112	4754	405	50.4761	0.037573	0.0279112	408.778	0.220473	4270.93	10434.3	14698.6	7.03129
113	5086	529	53.0501	0.0185116	0.0123388	408.803	0.238804	4070.52	10215.8	14384.7	7.75602
114	5200	746	48.9333	-0.0252551	-0.0223745	407.283	0.0964963	4713.05	7859.46	12900.5	6.35014
115	5534	683	59.4231	0.0636632	0.0142805	408.832	0.233438	4517.12	10717.8	15075.6	8.08767
116	4915	529	41.8935	0.0034864	0.0515696	409.501	0.213681	4297.64	11388.1	15320.7	6.95425
117	5008	556	55.506	-0.00493448	0.0510326	408.953	0.224962	4254.82	10649	14830.6	7.90198
118	5398	693	61.7094	0.0805144	-0.0810083	409.536	0.216535	3892.56	11028	14792.9	9.21808
119	4779	458	47.0419	-0.00181425	0.0207485	409.57	0.214585	4047.98	11258.8	15053.6	7.48135
120	5584	591	51.4684	0.0233794	0.035725	409.642	0.215941	3725.04	11079.6	14694.8	7.32882
121	5373	665	52.9355	0.0432263	-0.144017	408.003	0.161064	4125.28	8654.88	13138.9	6.90024
122	4975	660	54.8145	0.0335947	-0.00664305	407.501	0.101499	4532.65	8194.4	13073.4	6.81495
123	4790	408	51.9248	0.0166995	0.0974213	408.096	0.185073	3976.68	8572.72	12906.7	6.93926
124	4943	529	48.9684	0.09957	-0.0200881	407.814	0.16905	4199.96	8200.97	12736.1	7.00494
125	4829	269	51.2212	-0.00421292	0.00401753	407.284	0.128841	4632.31	7708.06	12641.9	6.65688
126	5203	438	36.5236	-0.0997792	-0.115652	406.001	0.187324	6422.74	4829.63	10721.9	6.44296
127	4854	630	51.3442	-0.0139881	0.0909501	406.223	0.187324	6267.82	4909.24	10503.5	6.12636
128	5402	715	53.5435	-0.016048	-0.0813038	405.998	0.187324	6498.69	4681.82	10540	7.02936
129	5221	578	32.1985	0.0611641	-0.0252556	405.777	0.186193	6737.55	4439.98	10563.3	6.66631
130	4325	684	64.4305	0.00856998	-0.0314782	405.542	0.181167	7140.42	3917.61	10274.9	6.93441
131	4493	483	55.0033	-0.0361772	-0.0345669	405.355	0.181167	7512.61	3469.35	10008.3	6.53225
132	4463	401	52.6891	0.0364299	-0.0993726	409.534	0.244582	3431.19	10596.8	14147	12.7597
133	5404	571	45.6784	0.0926198	0.0913852	407.448	0.17397	4553.83	7067.27	11632.3	6.70819
134	4977	571	51.0664	0.0214534	0.0168238	408.967	0.189499	3520.58	9733.87	13570	7.13342
135	4708	394	51.6111	-0.00913641	0.0124685	409.281	0.189929	3260.14	9959.46	13528.5	7.62823
136	5639	604	53.9183	0.0546564	0.0585846	407.116	0.162554	4903.64	6742.47	11640.3	7.15453
137	5033	466	46.6868	-0.00895296	0.0189391	406.136	0.134855	6017.97	5482.68	11323.4	6.39406
138	4627	404	47.6151	-0.110317	-0.00383553	406.159	0.173944	6187.78	5107.49	10845.7	6.41835
139	5263	683	57.5872	0.060411	-0.0684134	406.663	0.16686	5586.4	5765.35	10983.2	7.20773
140	5552	464	36.3522	-0.0986974	-0.11959	406.485	0.169629	5898.7	5347.86	10688	6.20502
141	4748	543	57.3669	0.00138423	-0.0274224	407.792	0.26127	4743.77	9538.99	14426.1	7.28235
142	5438	356	33.2981	-0.00225728	-0.0134806	407.965	0.25999	4738.7	9691.68	14534.9	7.13006
143	4754	390	51.0171	0.00435854	0.0110925	408.061	0.260714	4683.47	9878.81	14626.5	7.23892
144	4834	314	42.0283	-0.00145991	0.0249951	408.243	0.144619	4172.57	9294.88	13760.8	7.36753
145	5185	626	48.0691	0.0128387	0.00777378	408.924	0.216089	3705.62	9932.86	13882.1	8.27907
146	4915	976	57.2177	0.0146403	0.0110395	408.793	0.194243	3706.77	9676.52	13682.2	7.40222
147	4914	428	38.9743	0.0279756	0.0474294	406.918	0.167578	5230.92	6216.51	11229.6	7.23648
148	4250	814	57.9884	-0.000768599	-0.0561113	407.097	0.168839	5150.87	6164.06	10903.5	6.98875
149	5409	32	22.9226	-0.041567	0.0207226	406.516	0.115572	5440.5	6388.97	11916.7	6.37908
150	4398	622	62.8265	0.00881503	0.0105787	410.86	0.13827	3731.06	12908.7	16090.1	7.20378
151	5146	139	23.7096	-0.152147	-0.0194307	411.462	0.0795767	3528.29	13475	16353.3	6.63537
152	4389	747	44.1694	0.0293838	-0.0520977	411.332	0.0901472	3378.51	13180.2	16044.1	6.80511
153	4236	155	36.8663	0.0164671	0.013175	411.224	0.134888	3310.11	13031	15882.1	7.31283
154	4780	677	60.7236	-0.0102836	0.00617732	409.773	0.20549	4308.19	11853.1	15680.9	8.72155
155	5471	999	59.8172	0.0272791	0.0141104	410.024	0.198777	4005.96	11885.7	15479.5	8.12224
156	5499	302	32.1304	0.0324926	0.0239043	410.346	0.196977	3698.19	12055	15392.3	7.77145
157	4778	973	49.2475	0.0352695	-0.0202861	410.949	0.197434	3411.97	12624.1	15650.7	7.13533
158	4686	730	51.6324	0.0220858	0.0191229	410.692	0.197434	3379.63	12232.8	15301.1	7.44193
159	5183	838	47.3428	0.053662	0.0420022	408.148	0.186624	3851.81	8204.04	12343.3	8.51998
160	4749	471	50.7576	0.0507952	0.0162273	408.321	0.191174	3663.59	8260.71	12185.4	7.30544
161	4652	740	49.8608	0.0366376	0.0528819	408.002	0.183714	3983.59	7901.45	12101	6.70784
162	4892	897	36.6878	0.0256594	0.101497	407.932	0.181805	4075.99	7749.78	12007.5	6.91883
163	4892	635	50.4561	-0.00881294	-0.0108706	407.772	0.174776	4317.41	7130.89	11308.1	10.6323
164	5146	399	47.7139	0.0532871	-0.00226849	408.38	0.191846	3611.18	8209.34	12043.3	9.03503
165	4693	518	47.4937	0.0276657	0.038889	407.281	0.142184	4724.77	7381.95	12331	7.4662
166	5111	486	41.0724	0.0457429	0.0314682	407.852	0.181827	4145.83	7625.2	11914.3	7.69232
167	4194	309	57.4362	0.0292432	-0.0291182	407.487	0.1708	4486.94	7226.2	11793.9	7.95885
168	5214	418	56.8099	0.0175528	0.128103	407.343	0.17241	4906.96	6402.44	10901.4	6.72074
169	4464	264	55.2698	-0.178447	0.0530344	407.104	0.16437	5330.86	5853.45	10461.4	6.0609
170	4283	438	39.1694	0.0399554	-0.080415	407.45	0.172879	4761	6528.54	10855.4	8.2859
171	5214	534	36.4441	-0.158192	0.0702029	411.945	0.052803	3230.09	13766.3	16332	6.11492
172	4814	741	45.4576	0.0123277	0.0287886	409.457	0.244582	3386.61	10420.8	13983	7.22233
173	4971	524	46.3332	0.0605429	0.034617	409.894	0.229128	3059.46	10735	13940	8.23871
174	5182	557	44.0442	0.0402289	0.00888991	408.425	0.188355	3625.55	8489.21	12427.7	8.31483
175	4979	684	59.9792	0.0110572	-0.0115765	408.077	0.174776	4000.18	7495.79	11447.2	10.2874
176	4677	573	42.985	0.0496089	0.0277982	410.078	0.208571	3107.05	11052.1	14192.7	6.98305
177	4978	317	44.7936	-0.065702	-0.0547281	405.938	0.181167	7165.57	3797.48	9449.92	6.63248
178	4810	122	32.224	0.0101816	0.0170403	408.714	0.186165	3556.19	9283.89	13206.7	6.70042
179	5125	806	54.2286	0.0122674	0.0150109	408.758	0.18614	3447.27	9155.79	12973.3	7.73287
180	4526	547	55.361	0.0194061	0.0325936	408.502	0.185617	3614.41	8882.39	12863	7.32958
181	5109	777	53.6044	0.0647417	0.0167307	408.948	0.188579	3319.12	9414.73	13107.9	7.16171
182	4865	766	47.7046	-0.00555675	-0.010495	408.494	0.175461	3567.12	7919.7	11480.4	10.8828
183	4889	487	44.1951	0.015046	0.0027003	408.312	0.174776	3801.14	7612.02	11288.8	9.49137
184	5534	365	37.3138	-0.0125143	-0.00111828	410.934	0.197434	3000.52	12205.2	14982.1	6.57261
185	4871	289	41.6649	-0.0770419	0.011847	411.115	0.199608	2735.04	12173.8	14739.1	6.26712
186	4796	354	39.7642	0.0224457	0.0440506	410.918	0.197434	3195.08	12453.9	15350.6	7.68077
187	4190	559	63.6901	-0.0363176	-0.0589513	411.178	0.198862	2783.67	12366.3	14956.5	6.4753
188	4439	459	58.0927	0.0167437	0.0215938	410	0.210027	3538.37	11325.7	14704.5	7.1732
189	4646	618	56.1357	-0.0373434	0.116978	410.598	0.197434	3211.17	11879.8	14849.1	6.3021
190	4640	684	55.5924	-0.00649371	0.0237532	410.289	0.202215	3093.77	11350	14369.6	7.48623
191	4863	768	50.7613	-0.0195489	-0.0597605	410.573	0.199152	3103.37	11662.6	14588.1	6.78435
192	5027	486	39.1445	-0.0204268	-0.0278342	409.136	0.192354	2915.51	8978.95	12207.6	9.74547
193	5104	636	31.2184	0.00763312	-0.00162614	409.733	0.244582	2841.32	10280.8	13418.2	9.77501
194	5171	661	58.8613	0.0381053	0.056881	410.115	0.230192	2764.28	10771.8	13717.5	7.7486
195	4143	206	47.0074	0.0469414	-0.000196676	410.407	0.217453	2487.05	10840.3	13537.1	8.02512
196	5204	715	46.3332	-0.00822526	0.0452727	409.868	0.234975	2642.54	10262.8	13231.7	7.9612
197	4438	593	49.6638	0.00529134	-0.00568259	408.738	0.192354	3290.19	8461.32	11972.7	11.8105
198	4655	816	59.3572	-0.00495291	0.0197385	408.502	0.182281	3520.62	8069.75	11684	7.86868
199	5194	784	62.4584	0.0847584	-0.035612	408.833	0.192354	3216.53	8348.29	11675.6	10.7574
200	5546	354	39.4498	-0.0671742	-0.152222	404.984	0.18796	7972.91	2080.62	8394.28	6.53046
201	4893	603	46.9006	0.00412629	-0.0763335	405.209	0.177766	7825.33	2388.38	8350.32	6.9168
202	4851	559	49.4607	0.0289533	0.0527302	411.478	0.126094	3080.4	13073.6	15749.5	6.74331
203	5108	658	55.4521	-0.0858237	-0.0762215	411.895	0.0650442	2956.33	13522.4	15978	6.45251
204	4895	925	38.6158	0.0192166	-0.0297404	411.283	0.199436	2866.49	12615.5	15233.5	6.93554
205	5049	379	69.9511	-0.0229513	-0.110867	411.884	0.0879609	2730.22	13302.3	15660.4	6.70652
206	4473	604	54.0472	-0.10591	-0.042124	411.764	0.189519	2509.16	12963.7	15246.6	6.47752
207	4856	898	51.6851	0.0454662	0.0816214	408.078	0.174325	4141.38	7156.62	10932.5	6.86509
208	5408	589	52.043	0.0611233	0.0236115	408.286	0.173386	3960.35	7303.11	10851.9	7.71971
209	4979	357	42.4729	-0.000263405	0.0120823	405.917	0.177211	7467.66	3396.96	8793.77	7.5076
210	5049	850	62.9424	-0.0121747	-0.0220513	406.132	0.159701	7293.46	3546.05	8555.61	7.4333
211	4773	545	46.8859	0.0278126	0.0139972	410.666	0.212669	2378.5	11141.5	13652.2	7.24076
212	4441	119	32.8238	-0.0472452	-0.0628114	411.065	0.2141	2464.18	11752	14130.1	6.61221
213	4511	316	27.916	0.00344323	0.0404803	408.715	0.185073	3639.01	9441.17	13426.7	7.06214
214	4660	332	49.4836	0.025873	0.00735451	409.348	0.200206	3135.32	10002.8	13454.3	7.70965
215	5225	920	48.4823	0.0317544	0.00551983	409.382	0.190865	3045.6	9858.29	13254.8	8.22242
216	4603	719	47.8023	-0.0344175	0.0347183	409.227	0.192354	3016.33	9578.61	12974.3	7.21003
217	5113	364	39.1666	0.025591	0.00682558	409.531	0.192354	2813.38	9830.24	13016.4	8.34478
218	4706	563	39.7846	0.014562	-0.00219285	409.91	0.196707	2548.25	10148.6	13050	8.80915
219	4420	245	44.9031	-0.104332	0.0426585	405.944	0.181763	6823.46	4191.21	10018	6.41902
220	4981	355	41.1728	0.0185119	0.0541772	406.37	0.173241	6774.12	4188.72	9257.53	6.77175
221	4758	828	40.9214	0.00953242	-0.0459148	406.488	0.177473	6510.42	4462.23	9459.56	6.8499
222	5048	776	49.268	0.00118774	-0.0111579	410.09	0.1957	2354.06	10267.2	12978.5	10.354
223	4652	575	48.5798	0.0477404	0.0353948	410.36	0.210535	2166.52	10490.3	12994.2	8.06261
224	4974	600	53.4754	0.0735182	0.0997528	406.523	0.163409	6738.44	4211.24	8932.79	6.26886
225	4660	567	43.3669	0.00293704	-0.0484369	406.482	0.16357	6859.52	4076.01	8829.69	6.84097
226	4504	346	45.0744	0.0273561	0.0808541	407.605	0.170991	4790.49	6403.39	10520.2	6.22195
227	4096	19	19.3118	0.0317937	-0.023076	407.983	0.174189	4247.94	7047.89	10892.3	9.39209
228	5314	907	53.2632	-0.100551	-0.172862	407.847	0.16862	4717.39	6337.66	10009.2	6.53286
229	5368	904	65.123	0.0671312	-0.059412	408.074	0.172483	4397.11	6742.7	10312.6	6.83026
230	5245	659	65.1532	-0.0631586	-0.166039	408.114	0.172483	4426.39	6633.43	10027.6	6.3916
231	4130	518	56.5133	-0.0524503	0.122447	406.25	0.184505	6358.13	4722.23	10240.3	6.41625
232	4752	695	59.0621	-0.0226409	0.00616566	406.447	0.17348	6242.51	4789.39	10020	6.67556
233	4332	464	52.4098	-0.0269749	0.0449521	406.657	0.17494	6311.67	4671.44	9486.55	6.47014
234	4613	937	49.566	0.0297475	-0.0218511	406.931	0.167126	6051.12	4918.28	9351.82	7.55936
235	4810	956	56.4663	0.0697965	0.0224714	407.075	0.153233	6268.99	4671.49	8612.71	7.86098
236	4919	605	58.4609	-0.0232579	0.0532853	409.244	0.192354	2899.96	9362.68	12641.1	7.28592
237	4363	289	44.8276	0.0141907	0.014808	409.445	0.192354	2761.07	9594.16	12736.8	8.10933
238	4476	819	69.3312	0.00456574	0.00662335	409.94	0.192354	2394.64	9967.24	12745	9.44778
239	4452	312	49.0261	0.0632846	0.00604556	409.713	0.192354	2437.05	9542.94	12332.2	8.07395
240	5055	414	58.8635	0.045586	0.0538164	409.939	0.192354	2237.16	9739.19	12332.7	7.96361
241	4706	827	60.2801	0.0817541	-0.0315357	408.667	0.174451	3542.84	7728	10944.2	8.75871
242	5147	1327	64.3353	-0.0354606	0.0889107	405.84	0.149889	7393.11	3060.23	8081.68	6.20106
243	4349	366	57.3485	-0.100677	-0.185451	405.62	0.155213	7539.33	2810.87	8162.36	6.80891
244	5178	1119	70.6415	-0.0759769	-0.0582498	405.801	0.146749	7323.13	2919.23	7898.54	6.48152
245	4638	129	48.5629	-0.0064972	-0.0579375	409.21	0.192354	2885.24	9174.95	12416.3	10.8332
246	5266	648	51.1642	0.0305645	0.0105027	408.742	0.19153	3314.55	8752.65	12396.7	7.51041
247	4676	652	51.1184	0.0270652	0.0106043	409.473	0.192354	2615.8	9310.88	12266.1	8.29914
248	4771	643	45.7211	0.0118971	0.0263004	409.608	0.194372	2465.73	9250.05	11994.1	7.49099
249	5037	606	53.5367	0.0841889	-0.00469994	409.368	0.192354	2685.64	8968.96	11885.6	7.49695
250	5054	705	45.8624	0.0105762	-0.000534901	409.716	0.208293	2349.89	9171.61	11699.2	7.0132
251	4442	649	62.7668	-0.0228389	0.0220545	409.717	0.202671	2383.79	9055.69	11551.3	6.31628
252	4807	808	38.1257	0.0629737	0.00995995	409.315	0.19257	2748.53	8822.11	11739.2	7.84053
253	4737	558	66.4672	-0.024897	0.0663729	409.048	0.189331	3045.76	8476.88	11564.5	7.75076
254	4509	112	42.7958	-0.0045587	0.0110204	409.379	0.198764	2755.09	8590.6	11272	6.6727
255	5035	766	46.3332	0.0482375	0.0564679	408.476	0.172483	3903.78	7267.72	10498.6	6.95547
256	4778	482	56.1681	-0.0673504	0.188205	408.349	0.172483	4153.91	6937.21	10144.3	6.19322
257	5122	636	52.7447	-0.0336167	-0.127893	408.668	0.179544	3872.83	7186.96	10035.8	6.62393
258	4705	647	48.9782	-0.135794	0.012354	408.388	0.172483	4199.88	6831.51	9916.65	6.09647
259	4651	684	53.5305	-0.0951176	-0.116442	411.579	0.2141	2306.04	12470	14663.3	6.52975
260	4819	850	47.5639	-0.107594	0.0387902	411.412	0.2141	2376.1	12244.1	14504.4	6.59775
261	4710	262	49.2826	0.0155271	0.0361032	411.901	0.192662	1933.54	12592.3	14466.6	6.86904
262	4778	515	58.6577	-0.0241359	0.0470892	411.484	0.211669	2198.74	12127.9	14227.7	6.28838
263	4240	854	62.0579	-0.031325	0.0427491	411.678	0.199755	1928.92	12150.2	14004.6	6.8782
264	4903	717	54.6205	-0.0169958	-0.0238545	411.157	0.213332	2084.34	11594.3	13715.1	6.51527
265	4475	667	47.5119	-0.049372	0.0317568	411.183	0.2141	2209.92	11675.1	13865.5	6.37283
266	4536	577	56.5103	0.00879634	0.000249332	410.746	0.211372	1881.76	10755	12951.2	8.73632
267	4089	521	60.749	-0.00363601	0.00758734	410.991	0.207791	1928.35	11206.6	13330.3	7.47446
268	4782	634	40.5369	0.12377	-0.0343722	408.897	0.180578	3220.52	8154.43	11262.7	7.66925
269	5597	742	51.8429	0.00815155	0.0620827	408.821	0.176633	3345.81	7955.39	11054.2	6.96251
270	4664	698	50.1951	-0.227882	0.130143	409.399	0.216707	2947.18	8219.98	10664.9	5.9182
271	5075	508	53.6907	0.00140858	-0.00641035	409.063	0.195641	3298.71	7867.47	10568	6.39969
272	4469	560	42.8334	0.0465853	0.0337648	410.826	0.240826	1665.39	10697.2	12712.1	7.29711
273	4330	278	57.8608	0.0340271	-0.0239976	410.935	0.245141	1510.77	10715.4	12584	7.52851
274	4525	548	54.0957	0.0598994	0.0508904	410.251	0.213249	1942.78	9955.69	12257.9	7.65234
275	5554	822	56.0775	0.0231406	-0.00849521	410.64	0.223408	1776.86	10545.5	12674	10.5939
276	4515	568	51.9615	-0.100704	0.0721358	410.38	0.236343	1797.84	9872.8	11991.6	6.93354
277	5235	462	43.9548	0.0102577	0.024782	410.256	0.244509	1825.6	9733.01	11826.8	6.57462
278	4487	445	51.7383	-0.015639	-0.103431	408.912	0.18719	3492.11	7651.85	10403.2	7.01867
279	4402	792	58.2189	-0.078208	-0.0930228	408.93	0.191934	3555.73	7543.37	10207.8	6.71275
280	4460	440	54.8291	-0.0891375	0.213332	409.262	0.201555	3235.4	7853.69	10194.4	6.24336
281	5058	44	23.6334	0.00390596	-0.0642637	406.57	0.157871	6840.68	4045.15	8509.98	7.10626
282	4503	960	52.1949	0.0128588	0.0487011	406.979	0.162901	6437.16	4468.57	8403.88	7.11269
283	4469	524	58.8661	-0.0856751	0.03058	412.407	0.0827454	2455.17	13723.3	15716.5	6.28147
284	4705	813	69.4811	0.143568	-0.200347	412.713	0.0876675	2207.11	13902.4	15620.6	6.98366
285	5429	753	49.6243	0.00231755	-0.0463793	413.097	0.143508	2040.83	14190.1	15620.7	6.8617
286	5191	833	48.9632	0.0266749	0.0414897	412.029	0.207083	2093.11	13013.7	14965.7	6.30646
287	4422	658	56.5441	-0.0702962	0.0972523	412.142	0.173167	1993.27	12974	14850.3	6.51373
288	4632	825	55.7772	0.025639	0.0682877	412.104	0.149762	1799.55	12783.6	14521.8	6.40067
289	5181	738	53.173	0.149359	-0.129653	412.248	0.12636	1554.6	12734.2	14263.4	8.53307
290	5233	503	46.1977	0.0247376	4.62117e-05	411.788	0.1933	1800.18	12191.8	13927.3	7.17076
291	4220	881	51.458	-0.0229974	0.0356446	406.791	0.161165	6685.24	4163.93	8209.76	6.79702
292	5110	782	45.7925	-0.0215588	-0.0543803	406.975	0.17591	6513.01	4298.82	7884.31	7.32021
293	4621	611	50.8145	-0.0127834	-0.00220143	407.29	0.18572	6210.6	4599.63	7685.44	8.22237
294	4504	682	57.3502	0.0372943	0.0474613	410.494	0.244018	1645.4	9867.64	11772.4	7.12451
295	4233	793	59.9426	-0.0210857	0.0393431	410.276	0.242836	1841.69	9510.93	11463.2	6.56548
296	4602	836	57.3854	-0.0756009	-0.223749	406.912	0.16437	5589.84	5549.02	10333.9	6.08116
297	4582	796	53.4325	-0.14581	-0.0177233	406.753	0.166309	5785.41	5341.71	10310.7	6.56555
298	4759	941	45.4943	-0.00754327	0.00983213	406.815	0.166867	5836.82	5205.47	10010.3	6.91119
299	4853	873	43	0.0181504	0.012478	407.283	0.165667	5759.63	5214.66	9229.62	7.0077
300	4235	376	65.631	0.0390314	-0.0391579	407.324	0.166799	5517.53	5485.47	9505.78	7.93385
301	4067	484	51.9796	0.0106917	0.0176876	407.578	0.177934	5708.94	5230.04	8504.89	8.39483
302	4510	481	51.8877	0.0975946	0.0313768	407.334	0.174074	6073.04	4849.59	8345.51	8.04347
303	5214	586	43.1139	0.0261948	0.0157485	407.535	0.180487	5860	5066.13	8325.46	8.40494
304	4165	241	50.0995	0.0275409	0.0151952	407.48	0.189263	6019.59	4837.48	7851.29	7.14355
305	4480	717	60.5104	0.00970774	0.0164417	407.613	0.189018	5896.94	4960.82	7790.82	7.91961
306	4187	871	51.6998	0.110776	0.0174975	406.368	0.158402	6923	3539.55	7654.58	7.78105
307	4031	347	50.745	-0.0110534	0.0554233	406.272	0.163089	6939.86	3355.81	7575.47	6.83206
308	4366	724	57.549	0.0488972	0.0276626	406.6	0.171175	6661.67	3661.95	7336.05	7.2574
309	4727	1122	49.7666	-0.0472665	-0.0548423	407.584	0.16437	5093.48	5915.35	9788.57	6.40497
310	5055	1093	63.6917	0.0153537	0.0318146	407.576	0.167418	5364.21	5611.21	9292.19	6.98691
311	4282	642	57.0279	0.0135852	-0.00643483	407.987	0.170732	4953.92	6012.72	9207.82	6.76966
312	5749	603	47.1256	-0.0264328	-0.0291167	408.16	0.182554	5067.07	5903.22	8615.11	7.42529
313	4435	512	51.7213	0.0465732	0.0275798	408.129	0.183431	5260.55	5672.64	8170.65	7.0975
314	5186	882	60.7014	-0.0177053	-0.0518374	406.163	0.150344	7176.78	3380.47	7942.63	7.06187
315	4648	891	49.9595	-0.0200877	-0.0310358	406.683	0.170489	6794.79	3913.17	7758.29	7.2533
316	4449	657	58.2871	-0.0222551	0.0226832	406.537	0.161552	6885.83	3686.5	7689.77	7.73266
317	4002	213	40.7631	0.0107857	-0.0213131	407.103	0.182524	6373.63	4247.77	7303.61	7.78357
318	4118	479	50.0208	0.0595828	0.0544056	406.133	0.17369	6899.21	2923.42	7188.82	6.79977
319	4278	511	52.5682	-0.00984995	-0.0191092	407.211	0.173676	6165.95	4270.4	6955.56	9.2855
320	4273	658	57.752	-0.110987	-0.0231954	405.217	0.156004	7745.63	2220.15	8114.25	6.57448
321	5280	931	56.2424	-0.0147006	-0.025436	405.716	0.15459	7272.66	2604.36	7593.01	7.06211
322	5446	588	49.7358	-0.0238695	-0.0191557	405.817	0.155985	7219.27	2786.46	7647.67	6.96795
323	4154	300	58.5214	-0.000648789	-0.00417613	408.927	0.179004	4081.7	6899.74	8994.67	6.48213
324	4291	132	37.9181	-0.258017	0.067086	408.281	0.172759	4390.84	6600.86	9708.42	6.14508
325	4445	616	51.2569	-0.0876945	-0.060534	408.276	0.168735	4468.76	6503.44	9549.42	6.25853
326	4119	385	49.3114	0.000162238	-0.0168548	408.469	0.174021	4520.44	6456.37	9053.97	6.79443
327	4075	84	35.1742	0.0104641	-0.00188157	408.58	0.173886	4263.73	6702.78	9337.06	6.45199
328	4986	1080	56.4481	0.00558415	-0.000588693	407.966	0.187215	5549.47	5323.03	7714.48	9.49662
329	4376	815	56.228	0.0857465	0.0684626	407.883	0.18733	5661.33	5185.64	7578.93	8.80352
330	4617	531	35.2484	-0.00441842	0.00235179	406.253	0.171553	6843.39	3170.32	7298.96	6.88772
331	4111	339	52.1677	-0.0211794	0.0135061	412.655	0.090974	1747.29	13548	15055.3	6.50038
332	5635	905	42.3429	-0.0384402	-0.0121485	413.013	0.0997738	1657.84	13857.7	15159.2	6.67957
333	4262	394	47.186	-0.046378	-0.00804146	412.16	0.141178	2183.54	13228.5	15194.4	6.20488
334	4912	632	49.651	0.0317317	-0.0718349	412.483	0.0969555	1761.64	13326.6	14922.1	7.32015
335	4664	637	50.4357	0.0302337	-0.0154453	412.793	0.0952482	1330.35	13341.1	14579.8	7.7602
336	5312	698	59.5593	-0.0340287	0.00469188	413.45	0.0920791	1369.71	14128.8	15046.3	6.48841
337	5547	590	38.8716	-0.00623598	-0.0134981	413.579	0.0825044	1147.23	14101.3	14848.2	7.12973
338	4475	727	56.9332	0.0297834	-0.00231538	413.006	0.0936482	1266.56	13535.2	14661	7.49931
339	4123	486	55.1302	-0.0159308	0.0522644	406.885	0.175619	6283.08	3760.51	6801.62	6.15848
340	4609	923	52.2742	-0.00450559	0.108663	406.81	0.175619	6412.5	3738.97	6997.67	6.50273
341	5767	1004	52.0646	0.143563	-0.226808	407.117	0.175619	6090.32	3965.88	6633.06	8.00053
342	4798	860	55.0067	0.18806	-0.0300474	406.876	0.175619	6258.51	3553.96	6583.77	10.0711
343	4190	47	32.8537	-0.0499788	0.014836	412.548	0.0942966	1323.86	12965.7	14268.8	6.62348
344	5431	1253	54.5103	0.0187186	0.00760748	412.77	0.101043	1111.05	13129.7	14222	7.17519
345	5314	782	64.2917	0.0363696	0.0123641	412.015	0.192583	1552.78	12288.7	13789	7.28787
346	4198	472	61.2663	0.0359904	0.0032475	412.524	0.145892	1167.97	12796.6	13962.7	7.72304
347	5151	595	43.9548	0.052607	0.0267933	410.99	0.201028	1143.18	10156.9	11491.4	7.44858
348	4243	284	50.5871	-0.0111819	0.0664195	410.801	0.204705	1377.75	9861.22	11287.7	6.5374
349	4550	495	60.2565	0.0203158	0.0848932	410.568	0.20921	1622.68	9570.67	11062.1	6.77826
350	4627	656	39.2317	-0.0700122	0.0139385	408.545	0.185528	4854.95	6080.62	8016.71	6.9236
351	5206	880	53.7048	-0.000803765	-0.0378408	408.443	0.18927	5010.97	5902.03	7821.89	7.13152
352	4926	823	58.0295	-0.0461551	0.041387	407.323	0.184807	6209.87	4549.19	7423.51	7.06697
353	4731	756	42.9772	-0.0661542	-0.0612159	407.556	0.184807	6017.52	4716.05	7193.12	7.4243
354	5366	1278	68.0292	0.00842099	-0.000293609	407.649	0.184971	5898.72	4901.71	7415.13	6.80174
355	4689	659	40.5369	-0.00724478	-0.0239996	407.885	0.184807	5690.29	5068.93	7076.66	7.6861
356	5436	799	68.3495	-0.027136	-0.0065599	407.351	0.184807	6173.25	4511.1	7191.69	7.28953
357	4707	970	63.3837	0.000103201	0.0741773	407.263	0.184267	6221.25	4374.4	7127.9	6.72161
358	4551	661	51.7059	-0.0364964	-0.0436981	407.572	0.184454	5946.33	4641.84	6883.75	7.39949
359	4339	839	71.1195	0.0258382	0.0228453	405.947	0.169528	7086.94	2681.48	7298.17	6.67126
360	5100	560	36.765	-0.00447731	-0.0649711	406.544	0.177017	6558.71	3139.12	6712	7.47339
361	4068	733	54.8145	-0.0297156	-0.0109842	408.859	0.183504	4381.93	6595.39	8532.7	7.25539
362	4628	587	29.1241	0.0163522	0.0266403	409.267	0.185924	3918.46	7082.94	8644.15	6.61989
363	5379	468	35.4307	0.0334689	0.0207705	411.147	0.198103	1040.05	10160.5	11240.8	7.90981
364	4862	979	63.3648	-0.474655	0.102505	409.464	0.2212	2977.54	8153.93	10401.2	6.24757
365	4976	675	34.91	0.00431341	-0.048475	409.964	0.191221	2560.13	8489.11	10100.4	6.69325
366	5417	609	61.1892	-0.140906	-0.0581904	409.493	0.196307	3082.64	7934.82	9924.92	6.22743
367	4240	658	65.9169	-0.0502656	-0.0947101	409.598	0.195725	2955.83	8077.75	10011.9	6.29106
368	5004	289	31.3977	0.0225181	-0.0268646	409.787	0.185685	2856.14	8118.53	9700.89	6.71581
369	4374	408	42.9141	0.0269434	-0.00539047	408.981	0.183986	4322.98	6627.76	8257.69	6.91575
370	5231	544	49.0883	-0.0486523	-0.067976	408.951	0.182882	4408.82	6531.65	8019.32	6.68861
371	5257	244	51.1283	0.0469136	-0.0395062	410.813	0.245141	1367.85	10338.8	12070.5	12.2184
372	4685	920	62.2958	0.00937408	0.0520228	411.195	0.243715	1175.31	10832.4	12368.3	7.63524
373	4050	757	56.658	0.0434539	-0.0160298	410.788	0.2378	1348.28	10118.6	11728.8	8.04307
374	4987	205	27.3693	0.014804	0.0106888	411.112	0.243686	1362.32	10858.6	12567.4	7.64267
375	5423	750	35.2766	0.0731862	0.0471721	411.388	0.203602	932.114	10881	12184.6	7.44438
376	5366	763	42.5276	0.0139606	-0.00250031	411.246	0.203486	944.039	10469.8	11722.6	10.5746
377	4692	804	39.2464	0.00691429	0.116791	411.613	0.197103	736.888	11039.2	12133.9	7.74529
378	3994	844	56.039	0.0490598	0.00238706	408.378	0.186871	5166.72	5702.74	7503.69	8.29902
379	4912	590	48.6608	0.0231745	0.0501521	411.895	0.196976	622.341	11349.7	12312.8	6.8408
380	4137	751	59.3115	0.00940677	0.00940677	411.419	0.224946	797.993	10357.1	11142	8.21639
381	4561	81	23.9456	0.0147187	0.00731133	408.6	0.192473	5022.52	5768.9	6802.27	8.50174
382	4669	750	49.9755	0.0248349	0.00578726	408.3	0.184963	5293.86	5500.99	6997.73	8.65275
383	4247	694	59.4801	0.00433197	0.041369	413.025	0.103065	936.548	13425.1	14313.8	7.20825
384	4945	920	43.5964	0.0167118	0.0460328	413.197	0.118693	663.716	13315.5	13990	6.78312
385	5243	642	42.2229	0.0342757	-0.0304557	413.582	0.119696	664.412	13848.4	14339.2	7.45467
386	5569	1112	53.004	0.00751568	-0.0295214	413.195	0.165516	464.378	13174.3	13669.1	9.225
387	4517	627	47.8531	0.0112514	0.0393098	412.664	0.219167	691.307	12327.5	12900.5	6.60519
388	4050	635	63.7894	-0.036199	0.00906853	411.57	0.192583	1502.37	11617.2	13257	6.3768
389	4964	313	33.1451	-0.00430751	-0.0124094	411.799	0.192583	1501.38	11884.4	13405.3	6.8876
390	4698	821	41.749	-0.0152961	0.0228633	411.725	0.198688	1153.53	11549	12921.1	6.92492
391	5138	545	53.8073	-7.36605e-05	-0.0099502	412.211	0.192583	1041.76	12053.7	13096.8	7.03821
392	5342	760	52.2265	0.0428912	-0.0023763	412.064	0.214428	710.233	11688.2	12611.4	8.11595
393	4467	541	36.7735	0.0125311	0.0529975	406.567	0.175619	6555.09	3474	7041.74	7.02474
394	5240	631	47.5934	0.00689842	-0.00133203	406.462	0.175619	6641.91	3352.88	7097.69	6.84797
395	4044	587	53.8656	0.0642846	0.0528207	406.835	0.175619	6291.8	3675.45	6750.82	7.63679
396	5004	418	40.9034	-0.0206806	0.0842577	407.19	0.180227	5977.59	3782.53	6254	6.63054
397	5403	413	63.1378	0.0859626	-0.0846322	407.258	0.184013	5919.55	3868.25	6235.97	7.52456
398	5295	659	49.3268	0.0409614	0.103513	406.983	0.171498	6304.49	4025.78	7015.49	6.57033
399	4210	564	41.2396	0.031468	0.0378279	407.143	0.174638	6129	4108.16	6798.46	7.13542
400	5037	416	50.1678	0.0373074	0.0191138	407.593	0.18691	5718.4	4439.26	6371.31	7.52332
401	5177	628	72.0101	0.011643	0.0039802	407.684	0.180064	5751.91	4685.87	6594.14	7.61322
402	4760	860	41.5897	0.0125215	-0.0436514	407.938	0.188222	5494.1	4863.64	6312.02	8.3699
403	4436	674	66.5495	0.0324824	-0.00332012	407.042	0.178641	6106.82	3622.08	6332.49	7.14589
404	4662	638	49.5816	-0.0334579	0.00716333	406.937	0.180056	6212.58	3469.68	6367.06	6.8186
405	4922	828	51.6749	-0.0801766	-0.0508556	407.332	0.189077	5879.97	3780.88	6019.15	6.69256
406	5605	1011	51.1045	0.0135857	5.4766e-06	412.393	0.192112	1171.16	12506.8	13640.7	7.47184
407	4101	784	56.2195	0.0090382	0.0301558	412.935	0.210982	615.053	12844.2	13439.2	7.43693
408	5526	1188	64.9729	-0.00684555	-0.00684556	409.039	0.182867	4428.7	6494.81	7710.84	6.9327
409	4532	1016	54.5604	0.0031609	0.0987608	408.77	0.187803	4782.98	6094.9	7410.34	6.65873
410	5247	903	49.3373	0.012103	-0.0728643	409.038	0.191181	4546.6	6321.22	7212.98	7.43544
411	5182	625	46.4044	-0.0608298	0.0527505	412.548	0.192583	921.768	12443.3	13282.3	6.94469
412	4533	478	50.4711	-0.0501455	-0.0347134	412.699	0.205979	732.179	12443.1	13071.2	6.64108
413	3967	936	66.2648	0.06757	0.0300581	412.911	0.236074	516.449	12599.6	13020.7	8.8786
414	4630	845	50.4773	0.0348032	0.0551736	412.494	0.212005	725.052	12167.6	12858.8	7.10238
415	4101	585	68.9751	0.0118428	-0.0251942	412.685	0.25119	270.613	12115.7	12416.5	12.8276
416	4996	387	44.0682	-0.0261285	0.146711	407.348	0.182377	5842.26	3970.52	6188.48	7.12756
417	4820	894	52.0646	0.140754	-0.217271	407.602	0.199936	5629.2	4125.84	5922.96	7.45402
418	3917	888	62.666	-0.12302	0.182535	413.991	0.055381	1420.67	14702.5	15351.9	6.55803
419	3917	166	44.2641	-0.106072	-0.0798376	413.931	0.055381	1377.45	14565.2	15181.6	6.37545
420	4755	683	44.9831	0.0156868	0.0410836	413.946	0.0772823	829.837	14276.7	14621.7	6.61442
421	4992	653	49.4944	0.0134723	-0.0539285	414.203	0.068909	890.792	14552.9	14753.1	7.05145
422	4870	870	50.2261	-0.151887	0.00331538	408.936	0.18248	3690.97	7306.32	9761.26	6.45461
423	5420	760	45.8436	-0.0319656	-0.0740861	408.763	0.17369	3946.4	7025.33	9553.32	6.47564
424	4752	905	57.6941	0.00622415	-0.0127353	409.47	0.187173	3328.03	7646.28	9381.32	6.83133
425	5373	640	47.3396	0.0125971	0.00642421	409.505	0.184668	3578.86	7408.09	8836.96	7.0922
426	4726	755	40.6299	0.0256668	0.0380125	410.053	0.190942	3071.54	7937.47	8772.35	7.37839
427	5123	746	45.2597	0.0105291	0.00700176	411.954	0.270128	221.198	11046.7	11590.5	11.1583
428	5129	599	44.1318	0.0133891	0.00798784	411.551	0.255367	727.98	10415.4	11070.1	9.21461
429	5281	828	59.3959	0.0103526	0.00958104	411.902	0.274863	455.612	10684.6	10990.8	9.30429
430	3970	723	59.3733	-0.000855595	-0.00983427	412.097	0.27029	112.414	11098.9	11480	10.7182
431	4148	898	56.3414	0.0282998	0.0245012	410.111	0.195288	2676.52	8285.64	9414.43	7.10895
432	3981	709	64.5708	-0.0798494	0.0106855	410.437	0.176815	2183.92	8791.81	9807.74	6.4087
433	4837	627	45.6213	0.0522196	0.0505361	410.607	0.227982	2191.75	8780.42	9437.83	7.17114
434	3897	243	52.3819	-0.0205883	-0.000747047	409.411	0.188373	4034.96	6899.09	7781.36	6.89128
435	4348	731	53.4089	0.0314254	0.0393129	409.661	0.188316	3646.88	7307.56	8182.96	7.9627
436	5242	1006	45.6712	0.0150141	0.00394551	409.838	0.190014	3639.66	7290.91	7658.41	7.72761
437	5320	823	40.7697	0.0621093	0.0726913	407.409	0.17778	5815.85	4199.21	6349.71	7.17916
438	5035	547	51.3404	0.0748213	0.0433959	407.731	0.194203	5577.21	4516.19	6193.99	7.49095
439	3861	81	48.1483	0.0695835	0.0336688	407.998	0.215348	5270.04	4705.86	5818.8	8.91803
440	4953	724	51.4144	0.0590553	0.0576308	407.789	0.206323	5444.72	4468.45	5924.36	7.54136
441	4590	880	63.1762	0.0224803	0.0572026	413.896	0.130443	229.281	13933	14011.4	7.37011
442	3870	724	57.0897	0.089753	-0.0985186	414.213	0.084855	227.288	14169.7	14001.1	11.6296
443	5482	1185	56.2873	0.0590901	0.0507568	408.274	0.23218	5129.95	5090.01	5889.58	8.04994
444	5212	748	50.0531	0.0772779	0.0363422	408.22	0.2215	5091.44	4928.76	5696.05	7.93047
445	5207	709	49.6815	0.0438126	0.0499855	408.351	0.217721	4959.83	4988.62	5514.31	7.36608
446	4280	1034	62.3691	0.0128137	0.025931	407.637	0.206063	5578.6	4224.97	5939.17	6.80944
447	5518	1193	53.6692	0.0219334	0.0358222	407.921	0.212311	5348.23	4494.18	5768.23	7.18352
448	5089	628	57.0382	0.013826	-0.139934	408.076	0.209723	5186.81	4599.75	5560.46	6.77475
449	4876	352	43.93	-0.0597073	-0.0120882	407.938	0.209723	5317.86	4417.89	5617.66	6.34766
450	3917	371	54.4503	-0.00742618	0.0324167	414.535	0.0630908	794.033	14897.8	14927.8	6.55195
451	4686	647	38.1414	-0.0410441	-0.0368353	414.683	0.0667377	705.753	15155.4	15200.6	6.66991
452	5326	725	48.5094	0.039505	0.0239105	409.179	0.191628	4480.8	6337.04	6710.99	8.37586
453	4110	683	62.3198	0.0164648	0.0164648	409.009	0.193655	4661.32	6104.63	6439.91	8.13406
454	3917	211	49.3935	0.0757839	0.0342576	412.371	0.265544	141.692	11316.6	11423.1	7.63208
455	5327	575	39.1914	-0.031478	0.0574109	410.692	0.19965	1924.58	9065.7	9929.85	6.72411
456	4426	932	53.3961	0.0550289	0.0179919	411.035	0.23284	1821.88	9172.66	9370.85	6.92645
457	4708	770	55.3215	0.0177252	0.0569094	411.016	0.228207	1748.16	9228.13	9572.67	7.45374
458	4127	844	49.3776	-0.0213084	0.0747877	409.443	0.193275	4190.31	6658.49	6877.03	6.91705
459	5259	868	54.1279	0.0804481	-0.0947062	409.598	0.19814	4027.39	6830.07	6892.22	8.00117
460	4614	718	51.7485	-0.0178531	0.027579	408.412	0.206027	5078.38	5299.18	5964.75	6.83346
461	5129	376	38.2148	0.00211989	-0.021657	408.638	0.195242	4943.91	5537.95	5937	7.13405
462	3958	17	7.0614	0.00272479	-0.00303652	408.885	0.213224	4632.46	5692.86	5545.14	7.59914
463	3909	642	55.7678	0.00877124	0.114395	408.459	0.216606	4872.71	5043.99	5404.54	6.27408
464	4819	743	48.7584	0.0456777	-0.0174225	408.592	0.229021	4763.91	5277.87	5422.48	9.26523
465	4994	1322	53.2675	0.0184319	0.109481	414.646	0.0865654	548.177	14816	14593.3	6.51871
466	5057	949	64.2513	0.0127344	-0.0531092	414.88	0.136121	320.662	14952	14484.7	8.96461
467	4951	821	48.0861	0.0756124	0.101333	413.722	0.25119	94.0954	13645.6	13752.9	6.97206
468	5425	959	56.7551	0.0284941	0.0249668	413.96	0.227503	236.051	13694.8	13475.1	8.10386
469	4881	203	41.9985	0.050308	-0.0114204	413.396	0.25119	158.588	13188.3	13357.7	9.39282
470	3975	387	52.2626	0.0925043	-0.0380071	413.521	0.25119	224.932	13480.2	13743.2	8.58347
471	3867	453	56.2051	0.0351724	-0.063593	413.666	0.248711	85.1132	13425.8	13413.7	11.6362
472	4708	313	52.6828	0.0494207	0.0102366	413.677	0.238539	164.328	13326.5	13182.3	8.63546
473	4353	849	57.3826	0.036752	0.0169989	413.033	0.256384	154.373	12376.4	12365.7	8.93255
474	4596	803	57.5872	0.0775604	0.0610995	411.841	0.215013	415.126	11072.3	11851.2	9.03261
475	5168	684	45.4684	0.0378369	0.0449844	412.524	0.25119	285.759	11565.4	11625.5	7.81415
476	4936	530	42.1074	0.0320411	0.0275517	411.464	0.253347	1049.42	10003.3	10351.2	7.42106
477	4708	774	57.1951	0.0297439	0.000937333	411.738	0.259085	760.749	10230.2	10207.3	8.04049
478	4708	153	44.645	0.0260212	-0.00792944	408.838	0.233937	4627.58	5532.03	5404.66	11.2716
479	4029	940	62.4232	0.0628777	0.127693	414.479	0.0894932	497.799	14565.6	14368.3	6.42352
480	5299	600	53.1955	0.0136706	-0.00114422	414.596	0.129939	251.189	14528.9	14114.7	8.86833
481	4731	161	42.0527	0.0334526	0.0252222	412.958	0.260159	169.401	12153.5	12103	8.08029
482	5132	739	45.9133	0.0259662	0.00891737	412.106	0.204185	581.16	11647.2	12489.4	7.32257
483	5219	743	47.2407	0.0675162	0.0110788	412.24	0.239646	290.25	11536.5	12145.4	11.0884
484	3861	224	41.1695	0.0220425	0.0631947	412.638	0.25119	289.778	11690.9	11702.3	8.45565
485	3917	647	59.0445	0.0587144	0.00192431	412.613	0.25119	196.529	11762.8	11871.7	7.68574
486	5146	703	47.5312	-0.292479	0.208755	409.573	0.2212	2728.33	8432.09	10672.2	5.58119
487	5490	1109	58.4855	-0.119215	0.294365	410.028	0.2212	2130.76	9154.96	11246.9	5.90816
488	5109	800	48.3768	-0.0687076	0.0473418	409.967	0.2212	2185.25	9070.88	11146.3	6.54111
489	5198	65	31.7943	-0.0403799	-0.0691865	409.851	0.220732	2383.17	8817.76	10917.8	6.45463
490	4992	1325	51.1933	0.023014	0.0090222	410.222	0.191389	2181.6	8949.55	10552.2	6.94784
491	3867	410	55.2437	0.0116052	0.0495919	411.04	0.211135	1435.31	9673.07	10466.5	7.70587
492	4043	212	31.3546	0.0320574	0.00233636	410.594	0.196986	1698.31	9467.5	10881.6	7.56587
493	3853	715	56.3717	0.0142599	0.0148772	410.72	0.176815	1770.59	9329.78	10400.3	7.17446
494	4523	642	44.3079	0.00880383	0.0107032	411.697	0.277095	777.544	10369.5	10688.5	9.33003
495	4907	662	33.9205	0.0170782	0.00555554	411.814	0.279391	675.361	10393.9	10429.1	9.45568
496	4251	707	61.5227	-0.0158292	0.0245316	410.936	0.217627	1650.46	9342.62	9998.95	6.75809
497	4157	785	61.2917	0.031598	0.0357133	411.607	0.230097	1005.9	9974.74	10003.9	7.4099
498	4051	860	41.5236	0.0363134	0.0288312	411.565	0.230097	1169.76	9816.28	9750.89	8.12805
499	4842	469	51.152	0.0253439	-0.00305115	414.675	0.13153	127.134	14509.1	13961.9	9.13267
500	3983	631	45.8694	0.0381309	-0.0324158	414.114	0.213809	134.395	13905.8	13627.5	9.18044
501	4985	367	45.8577	-0.0162216	0.0455068	414.269	0.11111	158.029	14179.8	13903.7	7.47074
502	5499	530	46.2923	0.0181876	0.0421931	414.332	0.178143	177.752	14037.9	13549.3	7.87014
503	5042	434	39.8454	0.0683219	0.0179895	410.657	0.244498	2492.21	8551.39	8802.23	8.63976
504	3886	744	52.5259	0.02394	0.00199216	410.859	0.265455	2397.13	8572.04	8304.15	8.26908
505	3853	425	61.4724	0.0517881	0.0468498	410.067	0.190014	3240.45	7709.88	8134.33	7.89563
506	4711	600	45.8348	0.0459451	0.0194901	410.553	0.213012	2912.53	8024.98	7680.41	7.9673
507	4093	774	57.5234	0.0210979	0.0125509	409.797	0.202385	3923.06	6866.39	6196.3	8.54307
508	5139	642	45.5015	0.00957223	0.0162199	409.602	0.201695	4131.08	6590.18	5915.61	9.4753
509	4805	475	61.6632	0.00301162	0.0491022	415.156	0.0999068	240.246	15486.7	15140.8	6.96344
510	4837	380	39.2024	0.0266868	-0.155649	415.376	0.123345	173.184	15497.9	14873.9	8.30308
511	4862	418	51.9141	0.0767386	-0.00419422	411.459	0.244498	1509.88	9535.78	9291.49	9.06128
512	5020	392	48.0226	0.0695361	0.018178	411.54	0.244498	1630.3	9461.62	8941.49	8.02952
513	4049	280	32.7554	0.00493827	-0.00740741	412.158	0.260218	544.34	10428.1	10011.7	11.3326
514	4622	1097	59.7844	0.0237915	0.00418362	411.936	0.230097	769.454	10223.4	9900.5	9.8156
515	4841	482	56.8043	-0.0103704	0.00691358	412.225	0.230097	625.747	10418.8	9718.23	9.04077
516	5049	539	59.7784	0.0167643	0.00304691	411.452	0.237141	1395.74	9601.74	9529.82	7.85768
517	4788	120	34.91	0.0350709	-0.0118427	411.78	0.233239	1178.73	9889.98	9398.46	9.74264
518	3867	487	53.4771	0.0462152	0.0626761	411.916	0.246082	1272.14	9880.68	9140.07	9.83385
519	3853	811	55.2552	0.0135704	0.0228297	410.468	0.230571	2886.2	8059.42	7993.54	7.41847
520	3855	570	58.3573	0.0455262	-0.0090005	410.696	0.235512	2769.26	8166.59	7640.79	7.88956
521	3853	253	46.0093	0.0278372	0.0388111	410.845	0.228586	2665.96	8263.22	7478.66	6.97831
522	3903	666	56.6738	0.0411792	-0.0232927	410.442	0.213814	3059.37	7866.48	7480.98	7.63537
523	3853	348	47.8836	-0.0416793	0.0867158	410.718	0.216692	2885.7	8014.71	7103.26	6.38511
524	4803	771	33.5465	-0.00115813	0.00752956	410.117	0.203353	3406.25	7512.85	7424.49	7.16685
525	4015	662	57.6563	-0.0493882	-0.0335152	410.376	0.216692	3207.22	7692.69	7151.2	7.36913
526	5151	324	51.6923	-0.00752799	-0.0220523	409.875	0.205909	3753.97	7108.73	6851.79	7.71637
527	4823	651	44.1642	-0.0223875	0.0475713	409.734	0.202213	3880.81	6970.44	6770.99	7.28935
528	4702	782	38.7947	0.028123	0.00739989	410.129	0.216624	3555.41	7286.23	6544.73	7.57007
529	4002	484	56.8443	0.00799687	0.0172561	409.998	0.198215	3756.8	6993.7	5850.96	8.46018
530	5482	430	45.2107	-0.0134695	0.0363541	415.367	0.128868	171.784	15440.2	14671.6	7.08374
531	5075	736	48.2473	0.0672207	-0.0738728	415.335	0.135489	138.227	15292.1	14474.4	7.21678
532	4329	571	60.5979	0.00181225	0.0228725	412.962	0.248553	445.856	12029.1	11739.9	7.70132
533	4104	121	34.1434	-0.0566098	-0.0411777	413.364	0.24696	768.938	12251.8	11509	6.75969
534	4513	853	63.91	-0.021973	-0.053719	413.281	0.270704	529.682	12293.9	11747.6	6.61682
535	5609	732	57.1951	0.00482954	0.113472	410.067	0.202617	2774.2	8196.44	9252.37	6.40477
536	4695	905	37.7862	0.0222903	0.031269	410.414	0.231616	2607.2	8403.62	9065.58	7.63586
537	3959	807	51.2506	0.0494227	0.0329618	410.984	0.237122	2023.64	9007.55	9152.21	7.32903
538	4861	333	40.2748	0.0330675	-0.0157784	411.291	0.248428	1927.46	9082.76	8570.51	8.81888
539	4104	781	38.2187	-0.0349653	0.00207175	409.873	0.205391	3858.32	6815.03	5569.68	8.41077
540	3853	507	47.0618	-0.00960516	-0.00848282	408.81	0.217643	4548.9	5320.51	5064.01	7.37951
541	3870	722	50.5954	0.0698003	0.0303738	412.575	0.316377	198.776	11339.2	11072	8.33553
542	3855	658	65.808	0.0191326	0.00925606	412.158	0.292071	331.895	10794.9	10707.4	9.5359
543	4199	831	43.116	0.00434054	0.00434054	412.234	0.290338	327.493	10640.3	10195.4	10.689
544	3894	557	53.6199	-0.0719315	0.187328	412.922	0.257891	585.195	11761.5	11320.4	6.18675
545	5651	798	60.313	-0.00221777	-0.00864781	412.999	0.285037	501.481	11673.9	10947.9	7.36172
546	4238	1005	55.4785	-0.00044795	0.00572489	412.352	0.285582	318.419	10663.6	9998.13	12.5356
547	4776	774	53.8627	-0.0316716	0.0856124	413.364	0.199228	839.188	12019.1	10970.8	6.42793
548	5251	493	45.4413	0.0317999	0.00823091	412.614	0.304925	180.745	11100.8	10490.7	12.1645
549	5355	1205	34.3943	-0.0278378	0.0462363	411.199	0.252684	2149.02	8801.18	7998.64	7.2899
550	4150	514	38.8801	-0.0161272	-0.0329622	411.339	0.252601	2024.08	8921.4	7980.84	7.11462
551	4931	1160	35.212	0.00564168	0.012226	411.292	0.258526	2017.82	8940.47	8205.96	7.62531
552	5254	1126	35.8528	0.0771091	0.0462449	410.457	0.244498	2675.22	8368.4	8809.23	6.76441
553	5066	1205	35.0129	0.0449535	0.0466681	410.374	0.199324	2829.24	8169.24	8522.16	7.90391
554	3975	620	56.7409	0.00759811	0.00759811	410.776	0.23513	2557.78	8407.04	8278.37	8.61318
555	4088	587	57.0547	0.0130192	0.00838956	411.177	0.261433	2259.29	8683.41	7870.62	7.84234
556	4592	1150	51.3551	-0.00500139	0.00610973	410.336	0.215226	3331.42	7529.3	6687.3	7.3077
557	4066	777	57.5435	-0.032352	-0.0261791	410.537	0.214509	3121.92	7750.15	6772.11	6.9954
558	4120	633	43.6293	0.00907193	0.0985781	410.335	0.211902	3345.33	7490.77	6410.02	7.48343
559	3964	517	51.3757	-0.0175635	0.0991593	410.89	0.208199	2734.03	8160.1	6985.8	6.48899
560	4349	1087	61.0852	0.0128357	-0.0749558	410.761	0.205083	2922.33	7945.36	6671.82	7.87822
561	4130	14	10.8493	0.0019264	0.0142721	407.632	0.194459	5646.82	3912.7	5739.68	7.42094
562	3853	238	43.7547	-0.0700061	-0.00637835	407.809	0.194279	5473.69	4157.18	5597.78	6.9232
563	4717	1101	41.401	-0.0464081	0.0124713	408.236	0.206463	5083.21	4581.69	5289.34	6.63732
564	4198	171	33.5817	0.00345067	-0.0600933	408.396	0.193881	4987.63	4589.14	5093.3	7.48888
565	4740	667	45.0229	-0.031198	-0.0188524	408.628	0.216779	4725.2	4953.04	4986.68	7.09
566	4991	806	45.5729	0.00412535	0.00503985	412.27	0.381812	891.442	10302.4	9333.86	11.5327
567	3853	470	41.6859	0.0290631	-0.0203196	410.571	0.256755	2752.02	8196.75	8101.01	11.4938
568	3967	680	63.736	-0.0344564	0.00103747	411.246	0.241493	2170.24	8771.26	7712.13	7.30263
569	5168	891	55.9452	-0.00589575	0.000277085	411.162	0.24679	2332	8605.56	7652.09	8.08575
570	4146	19	11.3386	-0.0371814	0.0684427	411.227	0.205834	2330.65	8583.68	7194.84	6.60333
571	3927	532	52.0382	0.00115844	-0.00548923	411.022	0.226797	2501.95	8423.97	7395.39	7.34757
572	5272	347	52.5061	0.0179099	0.0426012	413.641	0.244114	273.491	13158.5	12908.9	8.06245
573	3932	1165	62.313	0.0239679	0.0106346	413.528	0.248164	254.246	12872.1	12588.4	8.8557
574	4708	699	49.7133	0.0222594	0.0135717	414.132	0.231091	745.579	13379.7	12519.6	7.6354
575	5317	212	37.207	-0.0036324	-0.0197768	414.354	0.207211	665.765	13777.4	12973	7.41596
576	4673	659	57.88	0.0174264	0.0281618	412.766	0.285702	187.5	11199.7	10426.6	8.34943
577	3932	293	49.0392	0.0235507	0.0011742	413.017	0.223281	368.037	11428.3	10326.5	7.56684
578	5240	640	50.1525	0.0177967	0.00924973	412.823	0.218783	136.733	11105.8	10008.9	8.865
579	4785	373	32.1333	0.028343	0.0686723	411.902	0.297785	1342.41	9660.77	8549.18	7.38804
580	4887	749	68.2009	0.00496562	-0.000325387	412.253	0.319373	982.99	10053.7	8743.68	10.7039
581	4791	1094	37.9777	-0.0090535	0.0238683	410.3	0.206696	3486.02	7181.86	5341.49	8.80308
582	4028	678	62.1167	0.094384	0.0954128	410.223	0.206696	3545.42	7083.71	5234.72	9.43914
583	4737	476	35.4168	0.0147539	0.0133822	409.179	0.216113	4360.21	5925.91	5283.78	7.33303
584	4528	836	57.5426	0.0372241	0.0140292	409.252	0.232389	4175.18	5822.76	4867.84	7.8954
585	3883	728	46.4326	0.0419597	0.0395855	409.59	0.223215	3962.97	6220.84	4860.76	8.07294
586	3964	1035	57.5085	0.016831	-0.0016875	409.086	0.228645	4330.19	5646.84	4977.52	7.66815
587	5059	574	40.5495	0.0383819	0.0405605	409.663	0.2352	3813.94	6172.58	4548.65	9.07095
588	4721	126	24.5951	0.00730434	0.0226782	409.113	0.233224	4292.54	5390.99	4597.86	7.26728
589	4253	1174	37.6148	-0.00478571	-0.0245388	414.755	0.197895	869.564	14043.6	12854.7	7.70826
590	3853	806	61.2958	-0.00473251	0.0117284	412.396	0.300099	500.21	10581.3	9744.32	12.0943
591	4978	547	46.71	0.0327367	0.0283794	413.058	0.21487	141.876	11282.9	9915.47	8.1601
592	4808	1269	48.8581	0.00967552	-0.00267016	412.663	0.301994	384.477	10815.3	9687.93	10.032
593	4678	749	60.6783	0.0322318	-0.0125213	410.812	0.201791	2953.58	7855.51	5972.88	7.76311
594	5317	418	55.5433	-0.0484403	-0.0067736	411.132	0.201791	2536.9	8344.66	6775.84	6.49343
595	4241	114	23.2661	0.0332002	-0.0185341	410.85	0.201791	2860.99	7988.89	6434.55	7.93541
596	4251	36	23.8492	0.0264753	0.0388209	410.353	0.209248	3418.86	7383.23	6066.95	7.50407
597	3969	875	48.8464	0.00194364	-0.0042292	410.717	0.201791	3051.85	7738.76	5817.33	8.39693
598	4062	337	42.2169	0.0227573	0.00756262	410.404	0.204542	3390.47	7360.11	5688.35	9.01002
599	4859	641	31.0371	0.00280428	0.0157522	415.58	0.136245	187.985	15476.8	14377.8	7.54308
600	3930	388	54.0032	-0.0114147	-0.00812253	416.223	0.136323	484.287	16044.6	14147.3	6.44766
601	4165	217	35.1577	0.0142861	0.0537923	413.909	0.235615	679.013	13108.3	12258.8	7.78762
602	4536	430	50.3658	-0.0229377	0.000381936	414.375	0.200079	1170.21	13312.7	11960.8	7.02433
603	4249	986	36.7286	0.0182093	0.00625553	413.646	0.247152	636.599	12673.4	11891.8	7.38462
604	4200	938	38.0143	-0.0700167	0.0975318	413.619	0.198798	1052.01	12425.2	11339.4	7.02264
605	4088	468	50.1474	-0.0504846	0.0482808	414.286	0.204597	1464.07	12994.4	11339.1	6.83012
606	4644	945	57.9856	0.0132603	-0.0451759	414.236	0.198677	1132.17	13148.6	11831.1	7.4727
607	5025	688	41.4509	-0.07678	-0.0915948	414.021	0.197895	1159.18	12830	11507.6	6.95092
608	4003	985	54.1307	-0.0601424	-0.0519119	414.297	0.200207	1313.18	13126.1	11620.3	6.8585
609	4607	1192	65.145	0.00119587	-0.0146771	412.796	0.352845	427.564	10622.9	8813.73	12.4282
610	3970	1010	54.0185	-0.00350286	0.00225846	412.615	0.297162	633.921	10352.2	8571.22	11.9871
611	3853	503	65.435	0.0141691	0.00182341	412.357	0.313599	939.386	10020.8	8362.25	11.6909
612	4865	584	37.9459	-0.0433488	0.141836	411.832	0.313599	1482.68	9465.11	8119.44	6.76226
613	3902	889	38.4522	0.0576068	0.0164546	412.196	0.305406	1187.87	9758.99	8043.66	9.42657
614	4248	951	60.4252	-0.0287756	-0.0304217	411.877	0.313599	1515.72	9426.14	7899.41	6.55006
615	4959	465	46.5502	-0.0394314	0.0317379	411.952	0.260494	1508.48	9432.83	7724.14	6.96847
616	4924	441	46.0249	-0.172736	-0.0171802	411.403	0.211618	2315.55	8548.92	6493.19	6.40907
617	4284	393	43.9749	-0.223888	-0.00989622	411.379	0.203927	2303.24	8569.38	6606.78	6.65677
618	4808	592	53.2887	0.0194088	-0.0625665	411.158	0.204543	2582.74	8264.5	6325.92	7.80301
619	4631	305	41.8234	-0.0331698	0.129088	409.476	0.248172	3930.4	5883.3	4456.64	6.58456
620	4285	518	43.3145	0.0565655	0.075084	409.897	0.235707	3598.69	6354.44	4332.52	7.66618
621	4130	637	43.752	0.0276774	-0.00250088	410.05	0.23794	3464.73	6474.9	4201.96	9.39069
622	4194	300	38.3053	-0.013267	0.0443461	409.744	0.248172	3705.98	6084.68	4233	6.85509
623	4498	1150	69.8776	0.0275344	0.00207146	414.509	0.198398	1153.17	13612.5	12346.1	7.03391
624	5368	925	56.4942	0.00478699	0.02066	414.752	0.203551	1403.55	13787.3	12256.5	6.86679
625	5451	425	38.1708	-0.0103519	0.0114346	412.668	0.425658	597.323	10623.2	9169.6	8.8563
626	4190	711	43.5531	0.00852195	-0.00283607	412.795	0.398449	476.874	10672.9	9033.57	10.5031
627	5527	1039	68.1394	-0.0211855	0.0179092	410.987	0.201791	2770.56	8036.83	5891.68	7.88277
628	4898	545	50.0587	0.0264789	0.000141433	411.167	0.207999	2606.32	8214.6	6016.89	7.29029
629	4370	779	38.3982	-0.00494115	0.0490712	411.399	0.229814	2374.42	8464.12	6159.43	6.26953
630	5306	725	41.393	0.0247642	0.0388735	410.616	0.206644	3185.06	7537.3	5426.13	7.33115
631	4239	141	37.0438	-0.0246219	0.00829988	410.804	0.214701	3030.33	7667.07	5241.49	7.15026
632	4205	312	32.6882	-0.015932	-0.0200472	408.258	0.188991	5354.52	5317.99	6555.36	7.73823
633	4478	1126	53.1445	-0.0019945	0.00586184	408.838	0.197648	4809.71	5807.92	6039.3	7.42727
634	4285	22	21.4133	-0.00957774	0.00396268	409.425	0.206696	4259.33	6275.86	5485.46	7.59727
635	4284	542	45.7441	0.0319067	0.0290774	410.056	0.20905	3666.45	6793.02	4933	7.47635
636	3853	1087	62.4004	0.00769475	0.000171606	409.225	0.20029	4473.2	6183.47	5928.25	8.42441
637	4103	1062	60.0268	0.00932733	0.037546	409.708	0.207135	3892.5	6374.48	4883.54	7.31113
638	4762	226	33.5674	-0.00427446	0.00278021	410.362	0.230781	3267.01	6880.62	4266.03	8.68025
639	4757	357	39.4435	0.030075	0.0231108	410.075	0.212286	3553.61	6721.49	4626.28	8.31444
640	4932	388	47.6151	-0.0657007	0.0138603	409.474	0.248172	3952.98	5764.19	4345.86	6.29732
641	4195	856	67.8631	0.0395258	0.0226908	409.841	0.235855	3684.5	5927.67	3901.41	8.11968
642	5557	940	67.9999	0.109001	0.0678491	409.804	0.246807	3688.22	5991.05	4045.31	7.75968
643	4877	654	57.684	0.031815	0.0177057	409.643	0.233926	3890.97	5659.43	4021	7.32838
644	4158	583	41.0334	0.0605741	-0.0359467	411.793	0.23536	1898.44	8988.4	6753.08	6.93581
645	6014	1416	63.9204	0.0394031	-0.0479663	411.754	0.23688	1934.58	8941.35	6603.14	6.81684
646	4057	1024	61.9355	-0.412615	0.0709243	411.635	0.233817	2086.75	8780.89	6494.81	5.9842
647	4149	632	67.9119	0.0260518	0.0468851	408.568	0.198359	4815.34	4630.15	4910.97	6.78917
648	5162	929	60.729	0.0633408	-0.0354246	408.908	0.215796	4485.3	4832.75	4582.78	7.83508
649	4291	949	39.9715	0.0358008	-0.0143081	409.402	0.23147	4094.38	5435.41	4201.85	8.38317
650	4228	1132	43.1394	-0.0199729	0.0195333	409.438	0.222691	4059.91	5346.09	4153.06	7.03758
651	5267	918	57.4502	-0.0573922	0.177176	413.423	0.21389	602.034	11795.3	10344.8	6.78647
652	5310	1054	61.3203	0.0282985	0.00658711	413.534	0.212745	809.618	12003	10563.6	7.17188
653	4604	475	64.6096	0.0407788	0.0476375	413.342	0.220335	191.461	11556.1	9905.81	7.14766
654	4436	980	53.9873	0.00908755	0.0291493	413.263	0.262322	293.761	11406.9	9755.43	8.40408
655	4201	952	38.1943	0.027253	0.00487646	413.811	0.240363	566.972	12019	9960.31	8.38117
656	4764	239	31.1582	0.00536171	-0.0100704	413.135	0.298408	276.108	11196.9	9480.1	9.97232
657	4297	881	33.9613	-0.00284668	-0.00490429	412.926	0.266472	303.551	10683.2	8595.25	9.96711
658	4266	1267	35.9847	0.00349478	0.00843305	413.109	0.256857	116.585	10891.3	8672.12	9.19008
659	3853	727	58.917	-0.0745205	0.0321013	411.557	0.214602	2089.72	8803.46	6879.27	6.69777
660	3909	940	73.8065	-0.0138345	-0.0282378	411.877	0.227391	1744.21	9165.64	7110.59	7.12086
661	4239	217	36.2067	-0.00844675	0.00221542	415.328	0.240766	1129.69	14482	12741.6	7.21637
662	4469	1214	41.5023	0.00143213	-0.0710987	415.109	0.22538	1189.4	14260.6	12638.1	6.93322
663	3853	1093	57.4466	-0.0224769	0.125671	415.599	0.256656	1339.65	14647.2	12529.7	7.23897
664	5702	959	68.9542	0.00653175	-0.0192819	412.101	0.242437	1420.89	9520.81	7588.31	8.21329
665	4752	238	38.0025	0.0243837	-0.0118818	412.399	0.262136	1109.2	9829.38	7501.64	10.4525
666	5135	524	41.5991	-0.00259044	0.0133561	415.013	0.225232	1287.99	14120.3	12510.6	7.21147
667	4289	5	4.26591	-0.0745012	-0.0374642	414.973	0.210645	1493.28	13946.4	12271.6	6.50603
668	4306	1255	64.6401	-0.0619769	-0.0767918	415.282	0.22913	1634.19	14202.5	12219.6	6.83635
669	5903	1316	67.9052	-0.0432078	0.0467393	413.663	0.198649	1123.38	12305.5	10996.1	6.82969
670	3853	1101	52.2496	-0.0328845	-0.0320615	414.092	0.205043	1451.22	12731.2	11099.9	7.11243
671	4101	1118	53.3073	0.0300388	-0.056381	414.309	0.215367	1464.11	12775.3	10767.9	7.76256
672	3853	835	59.7998	0.0232395	-0.00286283	413.93	0.212279	1143.03	12396.2	10654	7.60402
673	4658	142	36.7136	0.00584081	0.036705	413.936	0.239902	799.735	12203.6	10208	6.92124
674	5117	739	55.3527	-0.00858994	0.0133579	413.593	0.254781	197.954	11635.4	9507.07	8.65156
675	4268	964	37.2776	0.00226108	-0.00082534	413.757	0.253089	388.949	11839.4	9538.53	10.856
676	4513	1185	68.7592	0.0115046	-0.0099379	414.231	0.226455	1125.03	12546.9	10328.5	8.18068
677	5516	559	39.5371	0.000678792	0.0359522	410.576	0.240063	3116.08	7195.6	4327.33	9.18667
678	5399	649	44.7385	-0.00107656	0.00098105	410.979	0.2389	2797.78	7579.75	4199.77	11.1866
679	4303	715	43.1564	-0.00970252	0.0314497	415.187	0.135868	77.5584	15060.1	14188.7	7.9396
680	4761	466	39.6942	-0.00960037	-0.0151084	416.049	0.127367	342.702	15721.8	13888.6	6.86123
681	4809	494	33.4615	0.0202587	0.00297473	415.662	0.148884	234.107	15257	13726.3	7.61668
682	4614	311	46.2325	-0.0889156	-0.143047	416.413	0.118044	750.697	15875.5	13391.4	6.35365
683	4299	186	37.7993	0.123321	-0.0927283	412.489	0.24983	1191.23	9704.29	6884.03	8.7334
684	4292	624	67.6024	0.0264573	0.0221	412.199	0.24983	1489.62	9392.69	6658.75	7.09395
685	4162	819	58.8938	-0.00209688	0.0158043	414.852	0.188875	456.938	14366.2	13338.6	7.47713
686	5247	681	44.0788	0.0183978	-0.00712775	415.403	0.190794	381.191	14926	13525.5	7.13546
687	4228	391	34.6194	-0.0282773	0.00648556	415.627	0.223184	918.378	14852.7	12950.4	6.50838
688	4429	897	39.1519	-0.099193	-0.160272	416.135	0.199717	926.769	15357.6	12936.1	6.48935
689	4742	839	43.6955	0.00782453	-0.00246354	413.21	0.268883	176.863	10868.6	8430.29	10.2674
690	4140	1129	45.6183	0.00825081	-0.0102677	413.315	0.277092	76.7433	10922.6	8285.46	10.524
691	4746	251	42.5379	0.00894946	0.0152658	410.79	0.223346	3016.13	7483.36	4592.18	9.33099
692	4955	1181	54.8241	0.0286045	0.0275967	410.876	0.224302	2948.21	7674.07	4907.58	8.4423
693	4628	1160	72.4883	0.0749333	0.0394395	411.296	0.231703	2554.75	7983.43	4444.98	9.32856
694	4350	256	36.8248	-0.107872	0.0110366	414.96	0.215367	1777.88	13776.1	11831.7	6.71519
695	4255	999	44.7455	0.0937788	-0.131187	415.191	0.256273	2127.73	13832.5	11504.6	8.57584
696	4426	867	68.548	0.0060286	0.0492385	415.005	0.23269	2010.38	13625.8	11398.1	6.7428
697	4648	173	33.4563	-0.00291024	0.0270721	414.636	0.215367	1717.87	13304	11380.1	6.72378
698	3853	876	69.0429	0.0624057	-0.00734744	414.913	0.252092	1980.57	13430.7	11099.5	8.34224
699	4784	726	42.8334	0.00242294	0.0099377	414.624	0.231436	1756.76	13136.3	10964.9	7.46903
700	4356	481	36.4648	-0.00324801	0.00662854	413.162	0.289751	382.376	10561.8	7591.68	9.89234
701	4639	853	43.9086	0.0348776	0.0464517	412.599	0.274053	1009.17	9905.08	7158.33	8.43804
702	4939	1113	62.0751	0.0012665	-0.000791117	412.913	0.277002	661.364	10271.2	7413.41	13.1644
703	4476	721	43.2914	0.0607491	0.0607491	409.94	0.248172	3526.37	6184.27	3957.36	7.37803
704	3853	937	72.8912	0.0547423	0.0289287	410.144	0.233555	3404.74	6228.8	3700.7	8.13472
705	4961	463	41.6399	0.030403	0.00262521	410.511	0.243819	3050.42	6600.24	3421.63	8.72332
706	4361	392	38.6993	0.0045483	0.0395277	415.261	0.296715	2228.77	13861.1	11378.7	7.89395
707	4368	17	9.73414	-0.00309365	-0.0468647	415.396	0.256575	2049.81	14151.4	11815.2	6.91423
708	4340	344	36.3873	0.036113	0.0018194	414.727	0.285781	1585.64	13028	10496.3	9.06209
709	4256	946	63.9511	0.0114671	0.0240458	414.322	0.26684	995.8	12457.9	9926.71	9.44432
710	5032	1183	59.9341	-0.00251411	-0.0117734	414.694	0.319868	1335.5	12815.5	9991.45	12.5417
711	4785	260	34.8679	0.0335051	-0.00353191	411.201	0.246887	2408.58	7283.39	2981.56	8.20024
712	4421	370	51.5375	0.0948712	0.00139681	415.752	0.329407	2100.94	14461.8	11778.3	8.12382
713	4797	881	75.2486	0.0116316	-0.0101204	415.494	0.311139	2340.29	14081.7	11421.4	9.83507
714	4319	22	13.2973	0.0217932	0.0777602	415.624	0.318584	2127.26	14330.9	11740	7.37815
715	5261	767	67.5495	0.00264491	0.00306341	413.044	0.280854	452.278	10524.6	7836.04	8.96729
716	4949	368	54.6929	0.00194055	0.00605577	413.07	0.327865	564.711	10334.3	6940.83	10.8585
717	4221	1270	43.6375	0.0314005	0.00362275	413.117	0.341573	602.754	10289	6792.89	15.2606
718	4442	129	31.6104	0.0500031	0.0363579	410.941	0.24768	2625.37	7101.7	3223.62	8.19515
719	3853	884	49.284	0.0335841	0.0361259	410.839	0.247126	2769.72	6871.33	3156.76	7.77232
720	4540	607	61.2043	-0.0562872	-0.00227481	415.742	0.258452	1441.58	14717.1	12439	6.90734
721	5202	791	61.1468	-0.0261819	-0.0261819	415.764	0.309969	1837.68	14574.6	12046.4	7.68419
722	5266	1037	50.1934	-0.00063455	-0.0360255	415.96	0.326915	1733.51	14809.7	12149.5	7.33768
723	4938	939	56.1261	0.00647721	0.00746486	413.564	0.269816	289.566	11326.7	8802.91	8.81498
724	5431	816	40.8111	0.0589421	0.0260203	412.587	0.271803	1178.15	9686.82	6362.78	7.27421
725	4740	383	47.4116	0.033417	0.0244384	412.679	0.303727	1063.72	9813.01	6551.35	8.18725
726	4845	785	57.6325	-0.0071372	0.027585	412.1	0.250227	1685.46	9167.39	6222.59	6.31339
727	4356	349	33.7938	0.0390773	-0.00581607	412.551	0.267435	1259.83	9595.34	6231.04	8.00921
728	5070	925	59.2031	-0.000778844	0.000764367	412.561	0.27753	1234.82	9612.94	6073.58	7.33945
729	3788	587	61.3281	0.0150265	0.00782486	411.777	0.231342	2111.9	8318.47	3937.2	10.441
730	4980	475	43.5187	0.00876192	-0.00769899	414.285	0.313909	849.467	12290.5	9547.81	11.7061
731	3853	1093	48.8091	0.000270672	0.000270672	414.378	0.3144	941.895	12291.6	9296.89	9.3377
732	6028	701	56.5553	-0.00325529	0.00714107	413.242	0.256857	146.291	11147.1	9083.89	10.7864
733	4291	440	41.9189	0.0182273	-0.0126369	414.104	0.307946	729.019	11877.7	8907.8	8.25535
734	4888	482	44.6756	0.000551627	-0.00932492	413.771	0.278935	434.294	11584.1	8941.58	9.98844
735	4720	210	47.2381	0.00902676	0.00302075	413.357	0.283098	250.827	10885.9	8062.77	8.66236
736	4990	514	34.331	0.0003663	0.0109483	412.695	0.274484	633.487	10316.5	8281.54	9.71604
737	4379	794	38.7249	0.00763717	0.0236865	410.381	0.248538	3202.52	6827.76	4091.03	8.61302
738	4327	803	46.5859	0.0440127	0.0197961	410.211	0.248172	3303.16	6473.18	3866.53	7.82886
739	5555	1210	60.5355	-0.00123457	0.0111111	411.268	0.233024	2535.02	7839.76	4029.89	8.95502
740	5053	412	42.3459	0.0266728	0.00985404	411.451	0.234923	2323.65	7885.79	3660.19	8.63277
741	4854	527	39.3057	0.030937	0.0354954	410.931	0.248364	2730.29	7320.41	3749.77	8.50753
742	4967	346	33.1811	0.00918062	0.0105916	410.85	0.248556	2730.22	7143.17	3532.84	8.22568
743	5867	1271	67.8205	0.0167071	0.0179416	410.852	0.248545	2728.06	7061.47	3416.08	8.7627
744	4248	524	38.6946	-0.00748084	-0.00624627	415.006	0.329407	1863.9	13326	10567.4	11.6453
745	4858	963	50.7613	0.0164784	-0.000276444	415.406	0.329407	2346.43	13796.2	10856.5	9.96339
746	4995	374	52.2036	0.0167972	0.0106244	413.111	0.278638	696.25	10156.5	6147.53	13.9688
747	4714	816	59.3421	0.0489972	-0.0152003	411.953	0.231342	1932.56	8456.17	3743.08	9.38899
748	4232	1588	52.1582	0.00684072	0.00684072	414.714	0.314203	1297.89	12588	9190.32	11.3528
749	4797	942	70.4916	0.0231719	-0.020038	413.431	0.306057	279.802	10615.9	6829.29	10.2532
750	5018	631	45.0775	-0.00882282	0.0238569	411.31	0.243594	2392.2	7194.12	2676.36	7.24548
751	4671	1498	70.8193	-0.0260232	0.0196558	412.47	0.275871	1436.8	9334.37	5202.5	6.64905
752	4318	443	36.3522	0.00423366	0.0269757	412.621	0.252821	1335.22	9412.86	4988	7.59874
753	4856	511	32.3788	0.0595638	0.0396208	411.588	0.231402	2292.9	8386.68	4857.03	6.62568
754	4500	475	42.6473	0.0307707	0.0334545	411.525	0.231566	2355.59	8211.56	4445.62	8.85458
755	4045	913	67.0014	0.0432282	0.0423464	411.799	0.231424	2112.4	8480.63	4437.78	8.46574
756	5006	1023	50.7185	0.00441068	0.00441068	412.223	0.231342	1719.44	8791.38	4005.52	10.2041
757	4797	793	62.3096	0.00705962	0.0152901	411.809	0.231208	1928.03	8092.49	3136.3	7.05053
758	4696	359	42.0595	-0.288146	0.0883976	411.997	0.219219	1723.18	8197.41	2861.72	6.59199
759	4289	570	43.5572	0.0139494	-0.0295545	411.571	0.224123	2151.39	7444.62	2504.97	8.15615
760	5979	914	65.6525	0.0435807	-0.00991727	411.506	0.246568	2123.24	7542.14	2699.07	7.54715
761	4268	628	29.3089	0.0112717	-0.006218	415.268	0.318608	1868.42	13332	9970.47	10.1016
762	4669	624	29.9053	-0.0241125	0.0261216	412.003	0.255481	1817.98	9009.28	5900.84	6.80582
763	4447	706	42.4922	0.0313033	0.0220441	412.427	0.276093	1457.17	9338.34	5416.75	7.00467
764	5164	1056	58.142	0.0339282	-0.0305437	412.734	0.278638	1162.62	9630.79	5394.49	9.08497
765	5072	1377	67.6119	-0.0845591	0.0424251	411.776	0.240405	1927.05	7896.52	2865.34	7.19725
766	4797	942	69.4435	-0.00308944	-0.0292332	411.561	0.243611	2097.63	7649.86	2856.88	7.37269
767	4745	1083	68.3774	0.0129902	-0.0487382	411.667	0.24258	2002.59	7713.87	2726.8	8.22584
768	3850	855	51.8025	0.0488375	0.0334055	416.715	0.262964	2051.72	15490.7	11809.9	7.87491
769	4705	58	30.0252	0.00602052	0.00301752	413.602	0.292523	286.507	10934.6	7429.13	8.75294
770	5821	739	61.0456	0.0139477	-0.000227003	413.497	0.29243	387.341	10804.1	7229.02	9.4927
771	4701	904	52.3152	0.036888	0.0414605	412.871	0.278638	986.442	9829.28	5634.03	8.02292
772	4568	128	32.4947	-0.00557734	-0.00310821	413.21	0.278638	683.929	10129.3	5563.39	13.6696
773	4713	562	51.0807	0.0138889	-0.0138889	413.324	0.278638	608.402	10189.9	5344.46	15.0864
774	5105	836	54.0185	0.00823045	-0.00411523	412.653	0.231342	1302.81	9199.5	3827.33	14.2554
775	5036	1083	62.9271	-0.00438862	0.0162715	410.296	0.226489	3308.19	6243.65	3464.49	7.45098
776	5605	796	41.5591	0.00245777	-0.00684622	411.166	0.231032	2573.33	6901.2	2693.35	7.64702
777	3737	894	53.6135	0.00766586	0.00413853	413.946	0.292738	411.241	11381.9	7610.38	8.36352
778	4309	615	42.4211	0.011548	0.014397	414.199	0.292738	613.791	11589.7	7696.91	7.79524
779	4410	231	31.0598	0.0257485	0.0289231	412.755	0.24328	1187.86	9514.88	4663.2	8.67815
780	4637	481	42.316	0.00070159	0.102553	411.348	0.235479	2468.94	8341.03	5841.38	6.23089
781	4593	608	31.7943	0.0256766	-0.0162987	411.675	0.239406	2154.08	8646.35	5644.03	6.95303
782	4705	354	50.0484	-0.027223	-0.013149	411.365	0.226262	2487.65	8258.23	5303.75	7.26081
783	4296	632	34.695	-0.106142	0.171635	411.641	0.24983	2151.49	8676.85	5989.42	5.84198
784	4699	790	68.0983	0.00113169	0.00730453	412.518	0.231342	1469.44	9068.48	3993.72	11.9204
785	4967	441	51.07	0.0128823	-0.00393334	412.022	0.237606	1879.4	8834.41	4926.55	7.83442
786	4934	873	63.2212	0.0323196	0.014095	412.362	0.231955	1570.51	9019.61	4231.04	10.2415
787	4936	478	62.3082	0.0269268	0.0186964	412.45	0.231342	1501.43	8894.15	3589.33	9.09022
788	4461	16	7.43711	0.0178413	0.0294387	412.154	0.229172	1720.69	8540.43	3366.55	8.1865
789	4323	609	45.8207	-0.0346673	0.0461969	416.328	0.194542	1197.05	15443	12674	6.72606
790	5022	885	46.9885	-0.00430965	0.0269661	416.634	0.123835	1154.65	15904.6	12934.5	6.73092
791	4471	865	70.4879	-0.00124873	0.0582751	416.186	0.29845	1593.74	15095.6	12247.4	6.74835
792	4524	422	48.8972	0.0394922	-0.0162069	416.877	0.181413	1734.57	15863.3	12282.4	7.49604
793	4797	846	67.4317	0.0458143	0.0320162	417.555	0.196628	2046.42	16601	12212.4	7.12396
794	5379	335	39.8146	0.0370235	-0.0226473	413.962	0.292738	274.902	11189.2	6862.34	11.1301
795	5219	1209	65.8267	-0.00938635	0.0140704	413.897	0.292738	208.196	11131.8	6972.23	8.99682
796	5460	1016	55.8849	0.00297666	0.0153223	413.008	0.341573	735.022	10141.7	6533.44	10.2933
797	4677	296	45.7689	0.011781	-0.00337054	413.545	0.302525	279.514	10642	6427.89	9.46322
798	4752	223	40.0585	0.017167	-0.0152404	413.569	0.278638	332.246	10488.2	5541.5	11.3658
799	3853	1074	61.9867	0.0158952	-0.00703245	413.403	0.278638	545.103	10239.3	5173.35	10.9091
800	3716	969	73.4516	0.00839665	0.000166197	412.982	0.24147	1013.9	9631.01	4328.45	10.4479
801	4593	418	41.0529	0.0380925	0.0155798	412.799	0.239678	1191.3	9433.7	4276.92	9.16594
802	4598	261	54.1726	0.0119295	0.0464974	412.693	0.233839	1293.57	9308.3	4198.59	9.34081
803	4270	1134	53.1901	0.00172248	-0.0369607	412.35	0.219396	1476.64	8629.4	2980.19	8.11716
804	4623	648	52.7152	0.0135237	-0.00705241	412.378	0.219219	1375.33	8528.81	2616.01	7.54618
805	4292	737	39.7031	0.00154321	-0.00154321	413.151	0.24147	835.331	9766.25	4098.64	13.6374
806	4803	791	45.2517	-0.00043573	-0.00455096	412.953	0.231342	1040.02	9436.38	3663.15	13.16
807	4398	710	35.5096	0.00166411	0.0420682	411.962	0.219416	1715.23	7970.81	2452.97	7.15623
808	4503	1163	57.0783	-0.000818635	-0.0472965	412.156	0.215353	1573.31	8054.97	2189.17	7.65372
809	3651	1145	69.7753	-0.0206592	0.0287235	411.795	0.198313	2026.87	7492.99	2194.27	7.03259
810	3651	124	52.6692	-0.0318093	-0.00958709	411.999	0.194521	1859.13	7627.72	1994.41	7.15209
811	3651	490	62.2471	0.0234189	-0.0722601	412.139	0.19698	1751.38	7743.7	1897.62	7.37858
812	5098	979	48.0691	0.0136707	0.0249876	417.472	0.160027	2281.14	16337.8	11889.4	7.11244
813	4581	336	29.165	-0.00150172	0.0175312	415.794	0.339678	2622.28	14167.7	10806.2	8.16817
814	4464	364	48.5995	0.0205163	0.0129718	415.066	0.305781	1644.7	12789.8	8922.13	9.01107
815	4428	578	39.24	0.0413113	0.00427431	415.047	0.302095	1668.49	12673.7	8620.31	7.84386
816	5205	739	54.4863	0.00841302	0.0042978	414.358	0.292738	799.142	11775.3	7801.93	8.41437
817	4361	381	43.6457	0.00556709	0.022851	414.66	0.292738	1046.99	12020.5	7638.01	6.7362
818	5789	1005	70.1555	-0.0195218	0.0474976	411.928	0.24983	1849.15	8997.05	6144.1	6.93565
819	4700	365	40.685	0.0169209	0.0132898	412.94	0.278436	884.809	9953.96	5930.64	10.4955
820	4491	43	14.7074	0.0449161	0.0387432	412.594	0.277501	1217.34	9615.81	5900.95	8.14722
821	4708	833	72.0681	0.013094	-0.00277897	413.479	0.278638	423.732	10401.8	5709.37	10.3572
822	4387	373	36.4921	-0.000181554	0.00907771	413.099	0.239327	924.596	9588.97	3755.22	11.9457
823	4769	640	34.3894	-0.00107022	-0.0134159	412.22	0.213615	1555.17	8036.19	2031.49	7.25866
824	4655	851	37.3283	-0.00391175	-0.0211307	412.084	0.212601	1703.68	7863.97	2033.14	7.9258
825	4444	561	56.7632	-0.00380458	-0.0390779	416.976	0.286221	2336.96	15666.6	11548.3	9.83853
826	4348	532	36.7735	0.00657464	0.031266	417.274	0.140878	2522.29	15962.1	11437.9	7.89843
827	5006	747	54.2439	0.00613565	-0.00526036	414.448	0.312579	1042.37	12240.8	8988.81	10.2038
828	5197	754	68.2987	0.00520209	-0.000970748	414.367	0.295894	1004.96	12144.2	8855.83	9.28273
829	5604	516	41.1639	-0.0130114	0.00344953	413.983	0.295243	645.158	11984.9	9241.14	10.6628
830	4530	1299	65.0626	0.0134629	0.0546152	412.798	0.231342	1155.84	9148	3209.44	7.15866
831	4684	197	41.7023	0.0220606	0.0316628	413.07	0.257022	908.044	9428.83	3199.06	7.34589
832	4401	314	30.7226	0.0215159	0.0122567	413.09	0.244211	907.409	9503.12	3420.37	10.6767
833	3651	155	48.9234	0.00646284	-0.000799329	413.764	0.292738	278.484	11056.1	7161.51	9.14874
834	4723	520	53.8732	0.00593088	0.00951511	414.573	0.294341	924.877	11883.1	7377.3	7.83207
835	4477	775	67.2027	0.0125723	0.00434186	413.637	0.292738	209.649	10776.2	6968.35	9.45565
836	4942	435	52.6947	0.00146605	-7.71605e-05	413.364	0.258312	661.21	9860.15	3719.18	10.2862
837	5550	1173	73.6812	-0.00208262	0.00902849	414.2	0.297284	872.555	11855.7	8416.52	8.03025
838	4943	783	64.8716	0.00445723	0.0164864	414.66	0.296142	1189.94	12167	8173.13	8.29645
839	4867	1389	65.0766	0.0097711	0.0064041	414.086	0.300501	626.814	11600.8	8149.13	8.54011
840	5339	1009	54.5025	0.00469406	0.00794293	414.504	0.298121	989.644	11964.2	8101.56	8.29892
841	4881	649	45.0837	0.00911797	0.0047088	414.674	0.295592	1134.61	12109.2	7985.47	8.46976
842	4888	609	55.3368	-0.00363734	0.0062392	413.101	0.278638	841.358	9931.81	5115.38	10.9824
843	4541	347	31.4497	0.00198113	0.00472462	413.375	0.280009	582.766	10167	4888.48	10.5402
844	5076	1034	71.389	0.0183715	-0.00631987	413.381	0.254751	652.493	10026.6	4434.66	15.5514
845	4663	908	67.8527	0.00540316	0.00428083	413.498	0.279727	487.968	10227.9	4622.63	9.68177
846	4646	718	52.4123	0.00670123	0.000528395	416.573	0.306927	2482.73	15191	11393.9	8.13565
847	5102	763	55.0411	0.0217504	0.0124911	415.631	0.318711	2201.55	13266.9	8725.35	8.88362
848	4553	499	58.0408	-0.00520988	0.00466667	413.513	0.259957	488.402	9938.83	3364.45	12.893
849	5139	923	48.9646	0.00051565	-0.00565719	416.052	0.343546	2543.7	13722.4	8984.77	11.2819
850	3651	1263	63.2045	0.000476579	0.00973584	413.582	0.260285	477.283	10020.5	3599.96	10.0697
851	4349	710	47.6625	0.0048216	-0.00928775	413.753	0.259957	310.809	10166.4	3491.29	10.4741
852	4870	757	43.0143	0.0255645	0.0838361	417.167	0.135267	2202.64	15964.1	11789.5	6.5783
853	4795	511	41.3843	-0.0386078	0.0354663	417.42	0.135864	2360.39	16215	11730	7.41252
854	4789	1485	74.369	0.0266621	-0.00296755	418.012	0.155138	2958.09	16649.3	11222	7.09659
855	4713	710	49.5874	0.0102374	-0.0240562	417.692	0.149548	2738.58	16434.7	11381.4	8.01722
856	4495	1185	60.0216	-0.00266786	-0.00487244	416.545	0.328546	2273.27	15239.5	11590	8.78003
857	5032	1040	55.9191	0.00518955	-0.000508453	417.601	0.153926	2861.24	16186.6	11162.1	7.89377
858	5051	724	47.5975	-0.110616	0.213458	412.675	0.226038	1211.2	8960.95	2948.67	7.17292
859	5508	1030	64.9864	0.021796	0.00173428	413.061	0.241068	852.318	9270.42	2689.89	7.57566
860	4921	852	43.928	0.0234829	0.0211681	413.234	0.259151	719.117	9470.95	2771.76	9.73567
861	4622	1402	73.1309	-0.000154321	0.0121914	413.557	0.254746	407.675	9700.93	2484.31	11.9002
862	5059	1373	66.857	-0.00553078	0.020613	412.726	0.224174	1070.81	8837.78	2452.55	6.81881
863	4481	948	61.7654	0.00520322	-0.0103171	412.861	0.226192	931.427	8882.26	2219.53	7.39258
864	5048	1592	70.392	-0.0656795	-0.0580821	417.644	0.192054	2334.79	16539.9	11883.9	6.93551
865	4650	515	37.3468	-0.0108919	-0.0283211	418.3	0.136225	2789.13	17234.9	11507.4	7.62295
866	5209	1182	58.5575	-0.0139966	-0.0294287	417.923	0.162427	2612.78	16742.7	11617.3	8.32367
867	4641	364	34.2949	0.00365345	0.00639693	413.867	0.295509	470.067	11441.1	7986.21	8.47977
868	5150	520	62.6785	0.0059493	0.00124619	414.354	0.295307	843.929	11817.7	7930.93	8.75154
869	4663	791	62.5338	0.021785	0.00635294	415.172	0.297955	1530.09	12503.1	7689.27	8.09636
870	5085	182	19.375	0.0442173	-0.0360296	415.352	0.297955	1763.69	12733	7640.19	7.61928
871	4915	590	34.645	0.0691358	0.00740741	413.214	0.259957	773.266	9579.71	3201.92	8.97952
872	5228	1299	55.5126	0.0583982	0.0337068	413.363	0.259957	654.539	9680.61	3117.45	7.72993
873	4668	379	33.9486	0.010753	-0.00159268	413.738	0.259957	320.287	10046	3121.47	11.778
874	4910	574	41.2468	0.0216965	-0.0304297	415.804	0.331571	2618.43	14297.3	11251.6	9.94509
875	4524	10	8.5501	-0.00155132	0.0103371	416.443	0.334784	2599.82	14971.3	11263.8	7.78584
876	4992	798	54.4629	0.0198588	-0.0154145	417.328	0.180909	2899.55	15771.6	10995.4	8.32495
877	4593	429	33.8656	-0.00120967	0.00249403	416.501	0.357788	3021.89	14286.7	9274.8	8.78678
878	4725	594	60.4502	0.00979951	0.0147378	416.305	0.34543	2822.49	14025.8	9069.35	9.22796
879	4692	350	35.2437	0.0528869	0.0594228	413.478	0.259957	524.948	9738.74	2889.75	8.55021
880	5152	517	36.4964	0.00163061	0.00427611	413.882	0.259957	183.076	10083.2	2797.17	10.3042
881	4956	954	47.6923	-0.0733457	-0.00263863	412.515	0.222058	1254.83	8358.83	1926.09	6.97366
882	4472	205	25.4663	-0.0114462	0.0136434	412.819	0.226283	958.271	8717	1947.15	6.98869
883	4578	12	5.89194	-0.0857104	0.00688223	412.581	0.223018	1254.73	8327.37	1769.18	6.94481
884	4517	226	35.1837	0.0121899	-0.0640888	413.021	0.226738	808.738	8795.85	1622.76	7.61538
885	4495	126	17.935	-0.00485674	0.0148963	416.133	0.340757	2611.42	13948.4	9474.42	8.34072
886	4575	62	10.8806	0.00693713	-0.00173821	416.425	0.351459	2950.82	14269.6	9405.69	8.78118
887	4893	752	60.7089	0.00682308	0.00888069	413.98	0.259957	161.522	10323.7	3202.88	10.0144
888	4481	799	61.0491	0.0114963	-0.00633639	413.871	0.259957	155.318	10035.8	2585.66	11.8943
889	5074	1066	64.1734	0.00466693	0.00242226	413.745	0.254846	226.384	9851.71	2359.58	11.5805
890	5117	862	50.406	-0.0201509	0.00691465	412.69	0.209355	1267.78	8202.36	1425.94	7.29784
891	4476	455	56.6091	-0.0244023	-0.0239766	412.851	0.203558	1108.71	8239.65	1230.75	7.13892
892	5379	1111	66.6555	-0.0833887	0.00527574	412.076	0.195122	1762.52	7521.21	1854.79	6.94404
893	4491	501	60.4636	0.0290289	0.00466241	412.781	0.20134	1145.95	8014.52	1237.65	7.04672
894	4564	249	54.2178	-0.0131204	-0.00172444	418.216	0.148458	2933.25	16987.5	11307.1	7.71845
895	4770	704	56.4277	0.0247594	-0.0137591	418.269	0.129051	3029.38	16973.5	11198.2	7.45898
896	4544	314	47.3964	-0.0110649	0.01871	416.136	0.342829	2741.05	14547.2	11148.2	8.25606
897	4644	32	15.482	0.0159433	-0.0255029	417.066	0.268348	3062.61	15430.6	10782.6	8.85378
898	4663	972	64.3881	0.0046434	-0.00488041	416.647	0.279748	2889.88	15096.8	10952.4	8.6921
899	4804	515	39.0698	-0.0132812	0.0253662	417.929	0.196044	3354.15	16339.3	10690.8	7.35964
900	4502	238	21.583	-0.102424	0.0704152	418.322	0.138088	3523.88	16806.6	10649.5	6.86234
901	5179	727	40.8004	0.0460783	-0.0230575	417.478	0.355961	3539.27	15730.8	10323.6	8.03041
902	4577	273	42.1316	0.0062826	0.139616	417.879	0.370767	3678.21	16168.5	10272.9	6.25788
903	5321	727	47.2158	-0.0017739	0.0188022	415.666	0.316089	2269.2	13733	10066.2	8.20407
904	4987	80	18.3299	0.00410745	-0.00247691	415.724	0.336551	2288.17	13720.1	9787.6	9.27142
905	4718	705	59.6505	-0.00145954	-0.0288944	417.38	0.370767	3610.31	15578.6	10233.7	7.62849
906	4660	1145	52.3748	0.0209873	0.0564811	417.752	0.370767	3739.9	15969.2	10157	6.68571
907	4772	684	53.8605	0.00330345	-0.000708893	416.026	0.33934	2561.88	13967	9736.85	8.62845
908	5107	196	31.42	0.0108493	-0.00835509	416.075	0.337886	2599.91	13972.8	9601.24	8.66567
909	5422	687	71.7316	0.000904627	0.00131615	417.339	0.370767	3775.56	15419.3	9979.78	7.87428
910	4554	17	6.47148	0.000691986	0.00686482	417.069	0.373377	3544.63	14858.7	9290.24	10.5072
911	4553	23	9.81836	0.028619	-0.0130477	415.973	0.311284	2507.13	13517.4	8513.29	7.63241
912	4478	294	46.0787	-0.00578496	-0.0592829	416.122	0.266645	2554.81	13532.9	8086.27	6.88221
913	5210	783	61.0867	-0.0164284	0.0558821	416.023	0.27835	2471.19	13447.1	8140.82	6.59579
914	4659	290	38.1708	0.00762989	-0.000226448	413.717	0.274619	361.461	10334.5	4314.96	9.36098
915	5032	91	26.0586	0.000933977	0.00587225	414.388	0.301112	314.813	11044.5	4393.52	8.07189
916	4493	40	29.5201	-0.0582548	-0.0355387	412.812	0.223018	1097.84	8433.13	1407.69	7.02014
917	5668	518	42.7152	0.0139688	0.00458612	413.245	0.223018	719.015	8811.94	1167.9	7.07645
918	4711	394	24.0669	0.0646567	0.129472	413.458	0.223018	582.354	8874.27	846.594	9.45963
919	5260	641	34.4487	-0.0436499	0.104498	419.292	0.0585597	3744.7	18090.7	10616.5	6.69467
920	4754	873	61.0461	-0.00703591	-0.0164421	418.678	0.0971721	3311.51	17481.7	10965.9	7.482
921	5317	549	41.6117	-0.0171034	0.0199337	418.81	0.0891023	3314.24	17641.9	11000	7.12348
922	4511	228	24.4255	0.00532221	0.0226062	418.209	0.163941	3606.28	16595.3	10521.6	6.78581
923	5096	907	68.3319	0.00776836	0.00386972	417.581	0.306297	3407.12	15928	10512.8	7.62517
924	4775	62	34.1811	-0.0143956	0.163735	417.714	0.370767	4003.86	15800.8	9856.61	6.6645
925	4836	719	64.7108	0.0103426	0.0176729	417.258	0.371308	3780.92	15159.7	9481.39	8.09647
926	4650	366	30.7427	0.00392671	-0.0384013	417.863	0.370767	3998.49	15965.1	9888.64	7.67627
927	4468	305	21.3554	-0.0739769	0.0371343	415.356	0.301209	1948.88	12989.6	8718.74	7.49993
928	4692	502	39.9059	0.0131384	0.0182824	415.597	0.299144	2140.8	13136.8	8451.08	7.29516
929	4879	237	29.791	-0.00904886	0.0265357	415.936	0.277244	2379.16	13353.6	7949.3	7.64153
930	5336	35	14.7207	0.0128859	0.0190587	414.656	0.303883	1419.97	12415.7	8583.39	7.57583
931	5512	1332	57.2289	0.00794443	3.05303e-05	414.284	0.292487	915.877	11910.4	8493.3	8.83056
932	5162	1043	58.579	-0.00542421	-0.00953944	415.139	0.300601	1652.2	12628.9	8351.18	9.21727
933	3641	1194	59.9916	0.008519	0.0146918	415.566	0.297955	1925.44	12898.3	7749.34	7.36544
934	4471	492	36.7254	-0.0142279	0.0160751	415.885	0.278103	2243.29	13213.6	7772.61	7.53046
935	4906	936	66.0536	-0.0016838	0.0135109	414.892	0.297891	1208.61	12157.2	7292.33	8.10154
936	4870	983	60.643	0.00198014	-0.00860187	414.879	0.295601	1093.47	12028.6	7077.2	8.46936
937	4950	707	56.3332	0.00622595	0.0182085	415.502	0.284038	1821.98	12771.8	7383.9	7.32156
938	4979	1098	62.7406	0.00641812	0.0037175	414.062	0.295701	302.386	10864.3	5050.02	8.59366
939	4648	406	28.322	0.00363265	0.0117048	414.529	0.300846	547.37	11369.7	5153.95	7.99837
940	4622	402	37.9549	0.02206	0.053399	413.405	0.206981	625.344	8681.89	767.673	8.269
941	4920	55	19.6373	-0.00350344	-0.00813307	417.851	0.154346	2940.63	16534.6	11206.6	8.32775
942	4660	417	30.4336	-0.0164585	-0.00523515	417.993	0.150668	3071.41	16542.7	11079.1	8.64779
943	4752	530	28.2826	-0.0117506	0.0527213	418.363	0.138088	3442.17	16874.9	10740	7.03501
944	5500	719	57.9259	0.0177271	-0.00653852	418.522	0.0925784	3400.2	17153.7	10827.9	7.38299
945	4444	927	67.9592	-0.0222075	0.0784572	418.909	0.0814185	3681.57	17506.2	10568.4	6.71548
946	5448	1399	63.211	0.0126413	-0.0155774	416.209	0.323566	2731.22	13754.5	8508.55	8.55715
947	4947	697	69.7126	0.0455041	-0.0149897	416.49	0.356803	3008.04	14041.3	8580.52	8.00445
948	4598	492	49.8017	-0.0724437	0.0806427	416.377	0.263514	2753.95	13728.3	7916.74	6.57224
949	5219	538	46.0649	-0.0107599	0.0674294	416.74	0.361833	3244.69	14297.6	8646.9	8.16977
950	5270	1642	67.1441	-0.00113685	-0.00319446	414.89	0.300069	1130.41	12053.4	6804.87	8.8686
951	5452	1308	43.2865	0.0104012	0.00175925	415.456	0.273734	1670.63	12594.9	6907	7.66163
952	5108	766	57.9952	-0.00613403	0.0110751	415.504	0.279488	1743.87	12678.5	7127.35	7.72821
953	4257	632	67.5422	0.0305668	0.0213076	415.825	0.259833	2050.37	12981.3	7089.63	7.40057
954	4493	1011	62.2439	0.010757	-0.00607803	414.218	0.259957	168.193	10499.2	2998.57	10.0279
955	5446	1085	53.0488	0.00620325	0.00188226	413.006	0.226609	858.268	9148.8	2516.74	7.45178
956	3613	462	45.3103	0.059382	0.0525706	413.398	0.227128	437.534	9296.96	1816.95	8.29039
957	5187	173	21.3222	0.00475069	-0.000630761	413.763	0.227008	172.962	9637.09	1745.72	10.7254
958	5283	1255	74.3961	0.0448062	0.0694976	413.433	0.223911	459.586	9117.65	1298.63	8.15918
959	5073	875	47.7615	0.0249019	0.00391427	413.866	0.223018	90.4454	9501	1139.96	11.2115
960	5030	426	53.8728	-0.00265619	0.00598578	415.779	0.257792	2003.56	12926.2	6873.07	7.22
961	4648	413	55.3602	0.00692968	-0.0010587	414.467	0.284306	794.455	11542.9	6406.54	8.71929
962	5225	2034	70.1878	0.00198025	0.00778999	417.807	0.370767	4096.77	15849.8	9686.05	7.6803
963	5120	764	39.2326	0.0106444	-0.0148186	417.876	0.375935	4191.21	15869.9	9552.89	8.67451
964	5114	677	56.0029	-0.00803227	0.0022558	418.177	0.372101	3864.35	16416	10158.4	6.71751
965	4549	584	65.4806	0.00792084	0.00127316	414.394	0.29094	495.615	11296.2	5788.6	8.92425
966	4192	1015	56.3638	-0.0156583	0.00491786	415.434	0.30566	1358.92	12180.3	5132.13	7.21998
967	4123	778	56.3975	0.000793442	0.00673766	414.177	0.298217	336.569	10920.2	4876.09	9.79125
968	4838	761	54.0338	0.00345066	0.00489099	414.821	0.301872	735.465	11518.4	4727.18	8.67122
969	4686	1061	71.0184	0.0176486	-0.0235037	414.295	0.300387	212.011	10957.8	4534.07	11.0807
970	4838	736	34.5619	-0.00172942	0.0126739	414.123	0.253443	104.414	10133.6	2153.75	11.2597
971	4397	856	66.6196	0.0140407	-0.00447777	414.383	0.268945	330.434	10403.7	2169.72	9.63715
972	4872	765	49.8883	-0.00202279	-0.00449193	414.311	0.253359	306.639	10258.5	1956.53	10.6839
973	5095	102	20.547	0.0842682	0.0508622	413.593	0.202267	466.187	8679.67	564.421	7.20404
974	5465	1249	71.1641	0.0129122	-0.00560631	413.886	0.227923	186.363	8947.67	290.276	12.9022
975	4100	733	49.7943	-0.0134271	0.0318404	413.419	0.278638	473.579	10333.9	5472.18	9.8483
976	4231	508	56.6864	-0.00786611	0.0115342	414.522	0.303557	513.391	11366.8	5458.37	9.12
977	4636	18	7.74018	0.0116725	-0.00922017	414.334	0.296352	508.282	11189.3	5324.19	9.31369
978	5097	720	42.2177	0.0079234	-0.0278791	415.318	0.30566	1267.06	12115.2	5369.36	8.20143
979	4923	528	51.4549	0.0102496	-0.00494506	414.203	0.27979	302.89	10687.7	3995.36	8.49323
980	5051	507	59.6641	0.00735477	0.00957066	414.135	0.267713	219.112	10654.6	3837.46	8.39037
981	4045	991	65.154	0.0394824	0.0353672	414.905	0.302097	751.888	11380.3	3762.29	7.82016
982	3613	1076	67.1907	0.0293122	-0.0126631	414.813	0.267322	649.972	11258.7	3686.48	8.19755
983	4729	1100	58.2154	0.0128137	0.00392482	414.413	0.267531	310.911	10833.8	3592.78	8.28106
984	5419	1392	72.5128	0.0288983	-0.012254	415.3	0.302097	1201.56	11991.5	4738.67	8.92674
985	5241	792	56.98	0.00547639	-0.0123563	415.374	0.302097	1261.88	12027.7	4547.45	8.31476
986	5327	532	46.8401	-0.00450444	0.0201869	414.872	0.288091	690.627	11127.3	2999.41	8.26877
987	4753	334	24.4709	0.00546961	0.00401718	414.114	0.234067	165.548	10029.7	1871.34	9.85166
988	4731	1103	65.8802	0.00260741	0.00458272	414.104	0.24215	216.661	9955.43	1679.92	9.87323
989	5331	464	38.9659	0.094147	0.078274	413.685	0.212316	328.63	8635.15	420.591	8.23826
990	3613	1020	59.4305	0.00280752	-0.00568014	417.845	0.352607	4356.43	15722.5	9200.75	9.38206
991	5327	371	43	0.0342161	-0.0447963	418.015	0.395065	4492.47	15938.5	9316.61	7.56304
992	4786	8	17.2425	0.0421299	0.0723768	417.049	0.365097	3563.38	14574.5	8534.42	8.58937
993	4450	714	52.4194	0.00918777	-0.00809618	417.331	0.335871	3820.73	14927.5	8609.04	8.13324
994	4748	406	30.0139	0.0401363	0.0208461	413.55	0.223018	421.452	9104.35	979.524	9.29166
995	5574	478	37.6148	0.00482674	-0.00196338	414.059	0.244459	157.28	9556.9	774.047	10.9014
996	5411	27	12.115	0.0106573	-0.0310093	418.416	0.399007	4263.9	16505.5	9754.66	8.24619
997	3613	1118	59.7809	-0.0156673	0.0326419	418.25	0.382966	4170.73	16373.4	9814.01	7.81226
998	5288	596	33.7062	0.028759	0.028759	418.48	0.387195	4098.53	16700.5	10017.8	7.62043
999	5535	1284	60.494	-0.00666204	-0.0101894	418.282	0.399007	4490.73	16274.1	9439.76	8.54907
1000	4969	907	58.8596	0.00257643	0.00283911	417.043	0.369331	3535.66	14792.7	9115.3	8.90817
1001	4606	1041	64.5626	0.00907152	-0.0261365	417.446	0.351011	3918.06	15160.6	8936.32	9.72048
1002	5452	1612	65.6654	0.00853304	0.0713838	416.893	0.351926	3349.89	14328.3	8288.72	6.90036
1003	4837	813	40.3958	0.0144892	-0.0373626	416.967	0.355343	3431.16	14409.7	8216.23	8.48778
1004	5560	720	36.2155	0.0237198	-0.0112596	417.029	0.344948	3446.23	14422.3	8123.44	8.26818
1005	5569	40	15.6604	0.0101986	-0.00523352	416.932	0.293472	3340.72	14314.3	7985.78	7.86479
1006	4757	413	39.7315	-0.00880596	-0.00989529	416.671	0.263514	3006.15	13970.1	7699.56	7.43119
1007	4263	1043	63.3328	0.0243369	-0.0074091	415.201	0.302097	1041.73	11755.4	4183.09	7.68675
1008	4550	689	46.0943	0.0151412	-0.0109219	415.252	0.302097	1126.67	11862	4313.9	7.78091
1009	5076	234	40.183	0.00592086	-0.00215131	413.749	0.269822	364.923	10321.5	4039.04	10.2695
1010	5315	647	53.4434	0.0199469	0.0190955	414.413	0.295037	556.049	10998.8	4037.58	8.49586
1011	4546	1051	64.4692	0.00299242	0.032622	415.014	0.302097	877.538	11583.8	4154.85	7.18602
1012	5350	750	44.4341	-0.011105	0.0517457	415.057	0.302097	934.28	11603.7	3950.66	7.57215
1013	4821	483	25.2432	-0.00611424	0.0213206	415.124	0.302097	969.449	11656.8	4041.22	7.58959
1014	4729	247	53.5941	-0.0039432	0.0223942	418.719	0.108577	3843.76	17125.5	10354.3	7.45587
1015	4937	486	34.9304	0.0082186	-0.0194122	418.801	0.151451	4138.56	17083.6	10037.7	8.7793
1016	4730	544	52.3264	0.00154359	-0.0548938	419.05	0.0820171	4386.63	17332.3	9794.07	9.03254
1017	4352	799	61.0525	0.031955	0.00520607	414.798	0.281891	646.972	11198.8	3497.46	8.01542
1018	5191	1290	66.8007	-0.095588	0.117375	415.498	0.302097	1297.12	11913.1	3666.87	6.69731
1019	4561	192	14.0932	2.55641e-05	0.0466024	419.549	0.0635361	4100.89	18237.4	10228.4	7.67204
1020	4844	842	68.0657	0.00199896	0.00905363	419.505	0.0643386	4128.52	18140.1	10170	7.73924
1021	4908	1049	71.4605	0.00342262	-0.0192111	419.63	0.066521	4347.34	18185.4	9932.42	7.61049
1022	4969	1007	63.0455	0.00801004	0.00266025	417.653	0.332837	4173.53	15284.6	8465.09	8.67322
1023	5219	1639	56.5905	0.0211597	0.0252749	418.389	0.398403	4647.04	16313.9	9263.23	8.22045
1024	5306	888	59.918	-0.00603127	-0.0471835	418.459	0.399007	4789.22	16382.5	9139.41	10.4072
1025	4393	1279	58.7689	0.000733036	-0.00235338	415.873	0.30566	1787.27	12614.9	5170.27	7.03341
1026	5248	1850	71.6055	0.0119323	-0.00967264	416.085	0.303617	2000.35	12828	5135.47	8.88029
1027	5064	543	49.4422	-0.011372	0.00920413	416.013	0.30566	1894.14	12693.8	4822.34	10.5723
1028	4562	1104	50.9583	0.000612658	0.00417919	414.443	0.263865	438.299	10079.9	1135.42	9.60598
1029	5537	645	37.6016	0.00127188	-0.00490096	414.426	0.256642	294.787	9955.28	891.717	10.3893
1030	4516	611	30.5358	-0.0161081	0.0394475	417.598	0.343103	4073.07	15291.8	8800.79	8.02365
1031	5282	942	46.1461	0.0067348	-0.00835436	417.719	0.335496	4216.34	15422.9	8708.36	9.44794
1032	4594	179	26.6221	0.0287206	0.00814447	418.373	0.372951	4867.52	16171.3	8791.53	8.35984
1033	4561	792	66.6828	-0.0173544	0.000752616	415.455	0.30566	1439.18	12291.7	5443.71	8.73539
1034	4545	612	32.376	0.0136658	-0.0121479	416.223	0.277191	2165.72	13020.4	5467.92	8.12046
1035	5397	707	57.9305	0.0298595	0.0360323	415.586	0.303487	1468.47	12268.9	4862.77	9.05603
1036	5710	403	42.2958	-0.0678974	0.00463345	415.704	0.30566	1631.82	12455.5	5154.55	7.92345
1037	4609	878	43.9139	0.004995	-0.00999619	415.9	0.303218	1754.1	12538.6	4713.82	8.49818
1038	4453	924	65.5071	-0.00231	0.00574153	414.18	0.255275	156.49	9538.7	543.802	10.4311
1039	4654	1007	59.8452	0.00584276	-0.00150586	414.264	0.257715	113.93	9445.95	275.26	11.597
1040	5470	558	63.9855	0.00785252	-0.00912279	415.898	0.305514	1766.02	12525.2	4505.28	8.0366
1041	4405	333	71.4445	0.00246646	-0.00258404	414.59	0.274871	503.288	10720.8	2471.78	7.97371
1042	4652	664	27.115	0.0146069	-0.00335046	414.521	0.271127	405.153	10585.2	2383.16	9.18111
1043	5177	635	57.7352	0.0310084	0.0152957	414.672	0.286134	547.108	10715.1	2326.31	8.42466
1044	5004	1088	61.2904	0.0265995	0.0667229	415.378	0.281078	1201.17	11426.3	2236.36	6.97843
1045	5368	626	37.0312	0.01709	0.0448678	415.475	0.276243	1275.52	11547	2353.91	6.58785
1046	5088	963	56.0876	0.00743941	0.0080273	414.875	0.288719	765.551	10878	2114.11	7.77563
1047	4367	229	44.8346	0.0342439	0.0805402	415.365	0.278045	1208.85	11393.1	2124.15	7.33583
1048	4562	488	52.6367	0.0372714	-0.0275434	414.911	0.288093	788.361	10842.4	1988.26	8.41465
1049	4862	430	42.6473	0.0241333	0.0333925	418.512	0.138088	3645.1	16977	10537.3	7.09652
1050	4610	180	22.0785	-0.0495991	0.077973	418.38	0.138088	3721.41	16756.8	10448.1	6.74853
1051	5080	1045	60.4374	0.0153988	-0.0247246	418.557	0.162872	3936.75	16866.1	10234.6	7.72056
1052	4669	874	61.838	-0.0126237	0.00826902	418.643	0.388291	4309.32	16791.7	9820.86	7.3854
1053	5462	1172	67.0117	0.00322744	0.0526102	418.59	0.399007	4495.97	16625.9	9543.97	6.63429
1054	4922	681	26.7822	0.0175782	-0.0799527	418.797	0.383741	4711.42	16806	9372.2	9.40047
1055	4786	609	61.3004	-0.0101129	-0.0320608	419.031	0.319571	4681.43	17083.4	9476.33	9.42657
1056	4757	1216	54.363	-0.000737778	0.0424721	415.967	0.254245	2100.13	13010.5	6560.83	7.65048
1057	5523	711	30.4604	0.0191432	0.0242872	416.27	0.258983	2437.16	13355.7	6765.23	7.2686
1058	4657	868	70.6733	0.000678624	-0.0296244	415.975	0.254332	2081.65	12980.5	6321.37	8.8435
1059	5004	1035	51.2944	-0.000543044	0.0246851	416.466	0.263514	2695.42	13622.1	6996.45	7.60098
1060	5657	411	36.3247	0.0146962	0.0137465	416.884	0.274839	3074.24	13993.6	6824.36	7.10608
1061	5074	536	39.9059	0.0609168	-0.0270462	416.816	0.275981	2906.98	13819.8	6630.19	7.9755
1062	4920	1097	65.3679	0.0259008	-0.0305366	415.384	0.291539	1179.32	11616.5	2915.18	7.89572
1063	4933	830	60.9077	-0.00299714	-0.00574062	415.309	0.292687	1133.86	11631.8	3142.25	8.3278
1064	3594	1224	64.5199	-0.059572	0.0291625	415.628	0.283193	1349.23	11797.1	2937.8	7.25257
1065	3568	1240	64.1459	0.0156484	0.00913265	414.841	0.279185	700.318	11076.4	2829.46	7.92695
1066	4389	1358	71.784	0.00359875	0.0110062	414.567	0.270899	413.514	10698.7	2643.6	8.79406
1067	4602	444	38.6282	0.0188074	0.0126346	415.366	0.285239	1159.46	11468.5	2481.18	7.37861
1068	4684	1193	66.8439	0.0280227	-0.0151872	414.609	0.272439	463.068	10788.1	2739.41	7.77822
1069	4965	48	25.7537	0.0222223	0.0360204	415.32	0.283913	1104.99	11448.4	2611.11	7.12907
1070	5052	437	65.3171	0.0129171	0.000571442	417.726	0.332007	4196.48	15240.4	8282.31	9.09234
1071	4627	619	32.6442	0.0209906	-0.00180144	417.842	0.408285	4301.06	15280.7	7932.78	8.6315
1072	5408	476	57.2737	0.00511962	-0.00400545	417.445	0.364747	3841.81	14810.9	7865.71	8.7278
1073	5139	566	34.3832	-0.0222296	0.0172765	417.525	0.363704	3952.69	14929.5	8049.18	8.03553
1074	5504	209	39.6942	-0.00597469	0.00769374	415.877	0.286215	1893.22	12751.9	5645.67	8.31938
1075	5321	1019	57.8555	0.0129232	0.0136091	416.499	0.301492	2516.24	13376.1	5646.5	7.94776
1076	4730	1025	66.9594	-0.00208798	-0.0114537	415.976	0.311866	1785.24	12503.2	4222.98	8.15204
1077	4883	1314	54.4773	-0.000818748	0.0115269	416.007	0.31617	1802.12	12479.8	3992.45	7.04215
1078	4992	744	70.3043	0.00999868	0.0141139	415.096	0.26896	806.188	10723.1	1164.68	8.45556
1079	5115	1434	59.5998	0.00279592	0.00567658	415.049	0.264424	531.946	10554.9	874.666	9.19767
1080	4901	710	51.9511	0.00618493	-0.00451466	415.076	0.262444	378.948	10534.2	740.814	9.98985
1081	4670	953	42.9979	-0.0139627	-0.0157264	420.117	0.0569367	4841.27	18580	9450.01	7.74305
1082	5025	496	73.4337	0.000158738	0.0125044	420.118	0.0591665	4754.72	18652.5	9566.5	7.68676
1083	3553	829	63.0438	0.0075992	0.00203154	419.045	0.0734346	4062.94	17481.3	10160	7.64927
1084	5116	769	48.922	0.00452897	0.00761539	419.408	0.0678294	4189.46	17923.2	10073.5	7.56623
1085	5658	455	43.2809	0.0181996	-0.00431316	420.01	0.0651826	4791.63	18412.7	9479.64	7.46466
1086	3809	789	64.5144	-0.00349722	-0.0144712	419.854	0.0727553	4774.01	18204.7	9481.14	7.73461
1087	4727	896	68.4682	0.00608872	0.00634592	419.6	0.082641	4788.09	17900.3	9434.78	7.6153
1088	4312	755	50.569	-0.0367854	0.0693875	420.036	0.0785047	4987.5	18372.2	9267.61	7.49842
1089	5705	541	50.1951	-0.0161498	0.0233564	416.774	0.270073	2853.34	13759.4	6495.18	8.05227
1090	5361	440	44.7967	0.0219709	0.0180026	417.26	0.334509	3338.43	14241.5	6482.23	7.27796
1091	4609	691	44.7233	0.0170216	-0.0289317	417.069	0.325764	3111.83	14002.9	6197.25	8.98078
1092	4312	1530	69.4112	-0.00951569	0.0381835	416.093	0.262533	2145.23	13031.3	6074.69	7.71961
1093	5038	565	33.692	0.00765167	-0.0249409	416.254	0.272428	2283.01	13157.7	5863.02	8.72088
1094	5324	1635	61.1445	0.00216489	0.00357582	416.85	0.307671	2875.35	13758.5	6012.22	8.3192
1095	5013	1132	71.2193	-0.0447695	0.0638724	416.246	0.323689	2045.57	12775	4253.25	7.70413
1096	4899	1021	63.3867	0.0138108	-0.0338082	416.406	0.324771	2195.21	12922.9	4201.18	8.83781
1097	5359	651	36.0832	0.0138406	0.00598426	416.344	0.325912	2181.33	12937.6	4422.17	8.45194
1098	5659	913	34.5263	0.00221033	0.0762844	415.567	0.302097	1421.93	12154.1	4294.73	6.95806
1099	5319	309	45.6362	-0.022336	0.0074994	415.687	0.302097	1505.13	12183.6	3987.65	8.10566
1100	5266	665	71.8415	0.00411982	-0.00429768	416.091	0.32026	1860.4	12491.1	3745.68	7.83094
1101	5581	545	53.1834	0.024869	-0.0343902	415.714	0.270573	1497.77	11581.6	1811.97	9.33849
1102	5396	537	30.5608	0.0115875	0.030106	415.805	0.270573	1565.08	11736.2	2029.49	8.18294
1103	4622	402	36.5149	0.016865	-0.00165352	415.911	0.270002	1656.85	11891.8	2225.22	8.24246
1104	4935	41	22.6353	0.0108697	0.0100083	415.103	0.278043	991.347	10943.7	1685.51	8.73407
1105	4609	10	8.38644	0.00661508	-0.00326146	414.96	0.274695	853.132	10657.3	1352.57	9.59033
1106	4874	1122	35.3644	0.00163362	0.0615983	415.619	0.270573	1408.57	11617.6	2160.78	6.93848
1107	4791	895	71.7662	0.00555556	-0.0438272	415.655	0.270573	1417	11519.5	1769.08	12.0104
1108	5233	582	37.5558	0.00893078	-0.0182297	415.676	0.267905	1237.18	11385.6	1289.49	7.98101
1109	4391	820	72.0394	-0.00447992	0.0229549	419.406	0.0910144	4746.72	17576.9	9443.36	7.56067
1110	4726	882	58.1087	-0.000659186	0.0218851	419.549	0.149875	4877.92	17649.5	9317.03	7.72824
1111	5601	493	43.5194	-0.0169148	0.0365831	419.838	0.103687	5130.02	17991.9	9077.3	6.90642
1112	4738	1401	65.282	0.016508	0.0160142	416.632	0.263514	2904.7	13845	7319.88	7.68709
1113	4312	201	52.8243	0.0398232	0.00166384	417.123	0.283004	3341.75	14271.7	7178.24	7.96948
1114	4608	403	39.6373	0.066429	0.0528488	416.986	0.280264	3218.63	14143.8	7038.58	8.0181
1115	4723	860	52.3321	-0.0925565	0.114851	417.505	0.336098	3648.43	14561.4	6730.21	6.81483
1116	4305	116	37.26	0.00398361	0.00127358	417.3	0.302353	3541.6	14480.3	7336.79	8.22437
1117	4732	429	57.3024	0.0116414	0.00194118	414.614	0.272158	431.206	10875.7	3360.35	8.81741
1118	5192	374	46.8701	0.00185499	-0.00187742	414.935	0.281949	788.126	11296.4	3314.44	8.6732
1119	4127	1317	49.3772	-0.0172022	-0.00691409	416.041	0.319401	1814.61	12400	3524.36	7.97222
1120	4367	817	67.0262	0.0112305	-0.0258065	415.896	0.270573	1589.32	11671	1566.07	9.36403
1121	4877	1104	70.9283	0.00472604	0.0122083	419.471	0.139913	5036.51	17539.1	9134.17	7.35294
1122	5622	746	47.0999	0.0101358	-0.0170247	418.982	0.178241	4901.54	16936.3	9210.71	9.13915
1123	4519	1899	69.0959	0.0121193	0.0194352	419.196	0.313687	5316.21	17016.1	8769.69	7.48908
1124	3553	820	66.2662	0.0069024	0.0377666	418.079	0.332007	4573.98	15768.1	8516.85	7.74265
1125	5839	710	56.469	0.000985137	0.00221971	418.365	0.390598	4823.11	16065.1	8584.09	8.84303
1126	4519	909	62.2381	0.00430462	-0.00614173	418.401	0.403416	4858.32	16024.1	8343.69	8.2493
1127	4856	1618	71.6968	0.00436372	0.00819514	418.839	0.409001	5236.63	16586.2	8568.57	8.48459
1128	4359	862	77.5682	0.00438821	0.00967922	416.417	0.316586	2334.51	13171.2	5198.49	7.55148
1129	4608	602	45.592	0.00302989	0.0107459	416.723	0.341618	2636.51	13482.3	5288.05	7.50549
1130	4519	4	3.47845	0.0237409	-0.0611356	416.891	0.340405	2759.55	13584.8	5051.07	10.1964
1131	4738	1093	58.1031	-0.00391927	-0.0697629	415.652	0.289754	1418.21	11947.6	3246.51	9.56217
1132	5072	1134	65.2866	-0.0103756	-0.0141743	416.1	0.282418	1839.72	12339.9	3127.45	7.54953
1133	5467	866	58.5755	-0.00635496	-0.00223973	416.054	0.316683	1811.42	12358.2	3340.52	7.37015
1134	5082	740	57.4601	-0.0021234	0.0200988	415.995	0.270553	1495.66	11729.9	1455.68	7.52144
1135	4611	1601	72.2084	0.00643762	-0.0030032	415.687	0.259713	836.126	11254.1	951.103	9.19157
1136	5294	416	46.0718	-0.00156815	-0.00251782	414.895	0.285294	754.082	9337.64	564.192	8.42317
1137	5599	50	13.4313	0.000438181	0.00208427	414.848	0.278589	590.127	9276.48	447.714	8.88074
1138	4268	547	46.2394	-0.0232356	0.00145579	418.137	0.349485	4636.95	15959.4	8938.7	8.83791
1139	4250	1369	70.2827	0.0154866	-0.0131872	419.104	0.241805	5033.67	17020.4	9046.99	7.9801
1140	4904	1615	64.62	-0.00315185	-0.00764119	418.978	0.298643	5154.69	16880.5	8887.57	7.69979
1141	4519	1899	65.5152	-0.0411015	0.0354417	419.914	0.136722	5397.76	17905.5	8780.03	6.78948
1142	4519	719	58.2195	-0.0159605	0.0231341	419.492	0.17725	5282.59	17480.9	8885.93	6.98328
1143	5629	853	57.0897	0.00735942	-0.0159602	416.408	0.328224	2278.68	13067.4	4675.93	12.0019
1144	5601	1168	64.4013	-0.00932812	-0.0148151	416.775	0.364631	2609.22	13380.2	4492.74	10.8355
1145	5156	1162	58.4448	0.0215785	0.0215785	414.493	0.267777	504.344	8902.47	213.6	9.86082
1146	4955	1211	60.7114	0.00992148	-0.00242419	414.84	0.281954	736.281	9224.4	485.516	8.90021
1147	4878	216	55.5575	0.00348986	-0.0150287	418.917	0.424389	5369.35	16564.9	8235.26	8.27346
1148	4087	1285	63.6066	-0.00546412	0.00470291	418.955	0.428317	5400.58	16524.5	8003.43	7.94681
1149	4187	336	42.1331	0.0258129	-0.00573718	418.914	0.421417	5376.47	16427.6	7778.08	7.43753
1150	5101	831	55.3022	0.00456152	0.00153808	418.365	0.437544	4820.27	15894.8	8083.36	8.47253
1151	4339	1469	69.8081	0.0257784	0.0134327	418.653	0.427722	5079.82	16054.4	7497.38	7.7407
1152	3530	885	59.9549	0.0140201	0.0152863	416.289	0.268973	2022.26	12302.9	2342.41	7.86604
1153	5501	513	36.6134	0.0106549	0.013124	416.316	0.270299	1871.62	12178.7	1975.39	8.24796
1154	4616	797	52.6943	0.0084747	0.0272872	416.554	0.269088	2061.14	12476.9	2242.77	7.43898
1155	4784	1151	67.1637	-0.0349599	-0.0221885	417.059	0.225398	5861.98	826.029	14309.4	7.27116
1156	5250	282	42.8889	0.00226383	-0.00173036	417.522	0.228645	5346.1	996.768	13862.7	8.12893
1157	5082	401	57.4914	0.0477085	0.00714415	416.051	0.248328	114.373	11156.9	137.986	8.74229
1158	5045	909	57.4466	0.021675	0.00109888	416.092	0.247495	253.244	11299.7	237.567	8.9935
1159	4721	873	38.5901	0.0476835	0.0476835	416.062	0.248582	558.28	11426.1	524.925	9.16453
1160	4683	940	37.6056	-0.0174201	0.0257898	414.745	0.267483	165.961	9927.67	181.028	10.421
1161	3955	1089	69.6246	-0.00139299	0.00577547	415.186	0.25914	222.425	10560.6	596.568	9.05044
1162	5192	1044	39.4345	0.0301369	0.0272219	415.411	0.253889	272.933	10491.1	181.03	9.04302
1163	5730	1073	63.6922	-0.0830049	0.0148109	416.636	0.214038	6306.67	735.868	14710.4	7.09385
1164	5651	66	21.9275	-0.0234913	-0.0287824	416.957	0.225849	6041.57	730.765	14455	7.20678
1165	4679	579	71.0304	0.00436709	-0.0349848	417.374	0.229794	5998.62	398.413	14322.3	7.59873
1166	5356	773	67.4498	-0.017035	-0.0139486	415.987	0.268883	1723.27	12018.2	2413.09	8.12381
1167	5098	549	38.5213	-0.026423	-0.0198387	416.227	0.278236	1940.95	12399	2964.69	7.8395
1168	5141	1325	73.7153	0.0198693	-0.0654281	416.237	0.268089	1931.14	12283	2603.92	9.35766
1169	5190	410	51.213	-0.0293168	0.0653334	416.555	0.2878	2244.99	12701.8	2912.04	7.10998
1170	4595	345	61.5144	0.0434707	-0.0281342	416.824	0.324771	2501.35	12994.7	2977.73	7.41829
1171	5090	893	37.8543	-0.0244905	0.0866206	416.71	0.27017	2308.19	12757.2	2520.38	6.3325
1172	4772	948	40.2722	0.00940572	0.00792424	416.798	0.271906	2202.74	12757.7	2326.9	8.26693
1173	5417	774	67.2949	0.00758852	0.012672	415.841	0.257888	834.378	11372	878.797	9.04543
1174	5057	848	68.7377	0.0139115	0.0193985	416.074	0.250806	755.092	11529.3	727.963	9.50877
1175	5898	688	50.9743	0.0291402	0.00650647	415.922	0.248144	112.517	11090.8	204.364	7.93975
1176	4744	179	46.8357	0.036028	0.010349	415.966	0.24775	257.041	10966	229.248	7.80435
1177	4897	745	62.0018	0.00382161	-0.00407963	414.591	0.26747	400.647	9275.41	339.032	9.15617
1178	4970	795	59.1985	0.0131928	-0.00185352	415.237	0.284785	980.248	9653.25	847.754	10.1403
1179	4509	792	56.3828	-0.00269329	-0.00269329	415.662	0.280158	1391.16	9782.07	1114.02	9.29572
1180	4941	590	37.6462	-0.0085772	-0.0270957	415.916	0.280158	1551.52	9972.82	1302.6	7.23443
1181	5782	1210	65.1568	-0.0112996	0.0257375	416.397	0.324771	2152.05	12798.2	3762.69	7.93358
1182	5082	385	67.3088	-0.0105964	0.0740597	416.807	0.324771	2475.99	13002.2	3136.14	7.32094
1183	4541	910	59.4401	0.0308068	-0.0276295	416.753	0.324771	2465.5	13025.7	3296.81	8.00751
1184	4787	895	66.9774	-0.00504486	0.00219227	416.845	0.332561	2569.22	13185	3549.07	7.86647
1185	5597	1078	56.6911	-0.00171712	0.0106286	416.844	0.324771	2542.37	13118.5	3357.63	7.53199
1186	4723	762	60.8996	0.00829345	0.00237781	415.021	0.281414	982.779	9183.66	564.498	9.08188
1187	4938	205	37.7913	0.0220041	-0.0140833	416.014	0.280158	1725.89	9890.63	1368.23	8.67223
1188	4723	309	65.9098	-0.00956045	0.0288483	419.333	0.415542	5767.96	16950.2	8052.71	7.03378
1189	4519	400	59.7577	0.0120504	-0.00338172	419.538	0.415756	5886.99	17164	8009.67	8.20031
1190	5059	421	39.7607	0.00591621	0.0169623	417.773	0.413939	4115.58	15077.1	7573.59	7.97335
1191	3550	1246	66.5413	0.0222984	-0.00609666	418.105	0.437501	4445.02	15407.3	7435.88	8.38508
1192	4128	996	60.2537	0.00947157	-0.0250112	418.232	0.417428	4481.55	15420.5	7007.69	7.67163
1193	5246	466	47.4069	0.0148752	0.00341132	417.586	0.331218	3853.64	14794.6	7356.59	8.38054
1194	5417	735	60.3244	0.00598486	-0.0283683	416.9	0.273836	1870.79	12743.5	1987.06	9.06597
1195	5784	829	49.0303	0.0120047	-0.00698863	417.115	0.215003	6512.14	145.844	14739.1	7.23527
1196	5067	791	51.8025	-0.053515	-0.0139059	416.904	0.206825	6773.54	218.848	14731	7.97492
1197	4550	1398	37.8643	0.0423967	0.0591516	417.444	0.229165	6087.9	261.294	14372.9	7.53502
1198	4849	605	70.2034	0.00475297	0.00104926	417.123	0.222634	6224.24	303.048	14514.1	7.14013
1199	5168	303	43.339	0.0163666	-0.00879964	418.035	0.244698	5612.47	240.285	13906.1	8.46995
1200	6037	999	57.3045	0.00378364	0.0202445	417.989	0.243331	5290.53	617.401	13708.6	7.30099
1201	4989	603	55.7439	0.00932455	-0.0103163	418.173	0.242369	5156.7	570.456	13570.1	7.48579
1202	4695	1586	71.4735	0.0049823	0.0204144	419.825	0.421056	6042.09	17511.7	8045.36	8.38117
1203	4170	1181	60.0717	0.00673876	0.019496	419.127	0.416921	5566.69	16582.6	7579.39	8.26858
1204	4837	595	50.1264	0.0130759	-0.00279712	419.403	0.421109	5792.85	16765.9	7179.85	9.05289
1205	5709	939	46.8226	0.0183085	0.00695043	419.172	0.409208	5459.08	16408.8	6789.5	8.68964
1206	5521	1272	62.4856	-0.052143	0.102864	418.494	0.427565	4832.35	15796.5	7286.15	6.78227
1207	5640	253	39.2134	0.0169803	0.00926425	417.205	0.425709	3022.75	13807.7	4608.67	8.21535
1208	4751	782	69.6777	0.00674964	0.00674964	417.705	0.441879	3480.4	14253.1	4520.51	7.10617
1209	4953	1055	48.9656	0.0183024	0.0360802	417.601	0.433816	3383.63	14126.5	4276.55	7.35795
1210	5161	34	21.5639	0.00310183	-0.00554014	416.622	0.333422	2410.4	13172.4	4435.37	9.03921
1211	5584	461	43.5256	0.0146843	0.00182426	416.93	0.359372	2677.54	13348.5	3829.17	8.04441
1212	5694	99	22.3736	0.00279591	0.00103224	417.391	0.371541	3083.37	13703.2	3509.61	6.88993
1213	4939	582	72.078	-0.0460543	-0.0553136	417.389	0.341757	3070.53	13624.8	3189.42	7.25236
1214	4770	695	58.081	0.000215016	0.00897647	416.477	0.268974	1315.27	12116.7	1401	7.81549
1215	4270	1328	61.0301	0.0584266	-0.065716	416.524	0.263611	931.789	12048.1	1001.92	8.82514
1216	5206	1288	53.1955	0.00485048	0.0256618	419.995	0.408263	5989.47	17773.4	8174.97	7.86993
1217	4623	130	32.6387	-0.0345389	0.045708	419.983	0.42788	6286.67	17610.6	7831.82	7.55728
1218	4519	231	41.0919	0.00342676	0.012686	419.57	0.422608	6022.34	17031.5	7402.29	9.2578
1219	5417	42	28.8991	0.0128363	-0.011855	419.66	0.438695	6132.95	17130.1	7326.43	9.69358
1220	4910	364	50.1337	0.0589208	-0.0120669	419.462	0.39914	5775.48	16739.8	6914.6	10.4912
1221	5100	665	62.7901	0.0344723	-0.00873753	417.981	0.368086	3968.93	14851	6042	7.81587
1222	4645	788	68.8123	0.0144981	-0.00772414	417.955	0.364219	3961.16	14848	6148.52	8.19077
1223	5768	1025	58.5811	-0.0130781	0.00955563	417.065	0.341995	3032.19	13889.7	5556.69	7.75519
1224	4892	648	61.4984	0.0167746	0.0332355	417.662	0.364221	3686.01	14565.1	5977.94	8.07337
1225	5396	828	52.8811	0.0108417	-0.0089114	417.594	0.362119	3567.98	14434.5	5786.69	7.61228
1226	4723	694	45.008	0.00383092	0.0105649	417.311	0.382722	3041.34	13721.8	3843.56	7.77312
1227	4910	446	46.9489	-0.00398467	0.0573455	417.9	0.179031	6960	1164.36	14416.9	6.35386
1228	5481	1090	70.8425	0.0269013	0.0369322	420.476	0.0772056	5546.14	18739.9	8707.5	7.33809
1229	5127	966	56.7821	0.0105642	0.0319634	420.807	0.069723	5941.67	18933	8309.26	7.81243
1230	5698	656	63.5482	-1.32145e-06	-1.32166e-06	419.73	0.433795	6122.56	17099.5	7107.95	9.24717
1231	5252	57	18.3197	0.0495533	-0.0504467	417.683	0.371144	3590.47	14439.7	5355.27	8.35724
1232	5553	1124	62.0616	0.0212366	-0.0164178	417.607	0.37029	3476.57	14314.3	5185.88	7.75224
1233	4718	1604	71.3595	0.0068223	0.0115427	417.208	0.360403	3053.6	13865.1	4926.8	7.80323
1234	4723	1228	70.5465	-0.0817817	0.0367368	416.378	0.242334	593.279	11058.2	592.469	6.89208
1235	5222	484	57.9674	0.0107052	0.00658996	416.5	0.249697	265.019	11332.3	369.318	7.36968
1236	5722	1282	59.6403	-0.0101813	-0.00753577	417.943	0.178509	7255.19	1475.51	14044.9	6.97113
1237	3498	1251	73.2336	-0.0874003	0.0607478	417.343	0.178408	7554.08	1317.69	13855.8	6.64847
1238	4751	833	47.3175	0.0418827	-0.00926364	418.255	0.184824	6465.08	991.686	14496.5	7.74186
1239	5417	796	68.0653	-0.0476533	-0.0353076	420.2	0.134281	5457.83	18295.2	8770.66	6.70454
1240	5267	621	36.5518	-0.00272405	-0.00142451	420.211	0.15658	5639.44	18200.6	8553.13	7.10022
1241	4154	580	56.265	0.0139475	0.0113288	417.621	0.386352	3344.28	14031	3868.49	8.72982
1242	5417	454	64.5221	-0.0343786	-0.0405515	417.973	0.331947	3682.22	14366.6	3884.72	9.25117
1243	5636	413	38.2382	0.0385488	0.00592092	416.71	0.261447	237.99	11648.2	220.561	8.89821
1244	5304	400	49.3114	0.00143035	0.0401135	416.708	0.269579	579.2	12029.2	677.854	7.13496
1245	6169	344	46.7089	-0.0329952	-0.0141828	416.539	0.28336	2181.49	10212.5	1827.94	8.86317
1246	4625	311	43.3578	0.0362934	-0.0995091	418.413	0.179985	6626.03	1289.21	14537	10.572
1247	5627	754	52.6146	-0.0367439	0.0342437	418.492	0.184824	6236.5	933.379	14285.4	6.43854
1248	4519	619	55.1786	-0.0177605	0.024327	418.744	0.241128	4570.48	741.972	13062.6	7.20655
1249	4458	899	63.3494	0.014277	0.00810414	418.893	0.241128	4671.45	519.687	13091.6	7.52623
1250	4659	870	51.2694	0.00863798	0.0148108	419.297	0.39914	5539.35	16478	6570.49	8.08666
1251	5613	526	45.7689	0.0068158	-0.012792	419.422	0.39914	5668.57	16606	6485.02	8.39587
1252	5417	760	49.4427	0.00931828	0.0340096	419.008	0.401162	5173.55	16096.5	6371.8	6.6601
1253	5766	499	52.8632	-0.000702217	0.0253609	416.981	0.264425	1656.38	12739.7	1786	8.16522
1254	5762	440	41.4881	0.0199333	-0.0213772	417.08	0.280847	1065.32	12645.3	1254.95	8.12119
1255	4617	892	41.1728	0.0113463	0.015863	417.094	0.182841	7186.98	665.505	14487.3	7.04673
1256	4571	178	27.5748	0.0151336	-0.0112317	417.837	0.191083	6582.66	717.668	14479.2	7.44506
1257	3498	967	64.4586	-0.0175933	0.0266454	417.747	0.209989	6356.58	397.336	14441.4	8.39426
1258	4629	996	55.0411	-0.0251676	-0.0102894	418.872	0.243438	4312.82	912.633	12867.5	6.90539
1259	5777	149	26.0812	0.0144974	-0.0385891	419.527	0.250294	3973.61	681.327	12488.2	7.68142
1260	4625	331	53.7228	-0.0824375	0.0978095	419.934	0.252372	3663.43	672.358	12196.4	6.3687
1261	4468	646	68.8389	-0.0157981	-0.00915044	419.505	0.256967	3763.77	1003.71	12381.3	7.3191
1262	5676	720	43.2008	0.00117841	-0.00190801	420.03	0.440479	6468.12	17492.2	7289.26	8.83328
1263	4881	706	38.2353	-0.0110406	-0.0233862	419.965	0.440479	6358.7	17331.3	7032.24	12.8614
1264	5807	686	58.8393	0.0114733	-0.0152756	419.654	0.39914	5909.83	16851.5	6506.82	9.34057
1265	4557	891	55.4366	0.033718	0.0934711	418.691	0.227956	5869.07	718.364	13974	7.36256
1266	4625	487	53.4178	0.00513452	-0.101347	418.85	0.184824	6059.93	1070	14078.6	9.31148
1267	4713	1420	55.0251	0.0110194	-0.0204059	419.105	0.233745	5658.19	885.867	13729.8	8.5905
1268	4836	750	60.9761	0.0214584	-0.0114634	418.85	0.244698	5336.8	284.369	13543.3	9.28923
1269	4728	749	48.7774	-0.00951073	0.00348472	418.832	0.244698	5496.46	447.251	13667.3	8.41289
1270	5624	857	44.405	0.00501309	0.0394046	418.669	0.24459	5201.22	164.329	13477	7.01465
1271	5260	499	29.8531	0.0546763	-0.0354471	418.923	0.244136	5092.6	251.777	13356.9	8.68432
1272	4876	749	45.4268	0.024976	-0.0136043	419.358	0.375195	5473.93	16389	5952.55	8.37213
1273	5707	799	57.7352	-0.000329971	0.0504245	417.808	0.178408	7643.55	1757.22	13602.2	6.92769
1274	5807	171	39.7004	-0.00511285	-0.0309265	418.196	0.178408	7227.94	1662.53	14004	7.43452
1275	3622	578	59.3346	-0.0320563	-0.0559246	418.412	0.178408	7410.84	2010.74	13723.7	7.51223
1276	4120	626	51.8044	0.0115559	0.0291926	418.605	0.181453	6526.55	1333.04	14424.3	7.10893
1277	5867	917	61.0433	0.0142607	-0.0389207	418.727	0.180012	6673.55	1567.49	14335	8.90693
1278	5279	555	28.1112	-0.0128366	-0.00254849	418.655	0.178408	7203.2	2007.5	13911.7	7.17513
1279	4519	238	46.6768	-0.00423218	0.0358913	419.381	0.244698	5397.47	827.261	13488.8	7.73705
1280	4984	276	48.2768	-0.0121209	0.0166856	419.507	0.245339	5148.11	689.119	13278.5	11.0184
1281	5838	1369	62.8656	0.0028763	0.0187493	419.546	0.39914	5738.88	16667.4	6290.53	7.51213
1282	4940	615	67.4777	0.000577103	0.012273	419.23	0.386549	5412.95	16333.4	6172.35	8.14822
1283	4702	662	48.0281	-0.00643665	-0.036419	419.822	0.404965	6034.11	16963.6	6217.29	9.34706
1284	4388	563	65.0519	-0.00897252	-0.0105157	419.64	0.400694	5769.41	16687.8	5960.58	9.78025
1285	4819	655	73.9205	-0.0616276	0.113681	416.874	0.246295	611.448	11446.3	707.692	6.45043
1286	5048	649	52.3898	-0.00722613	-0.00552327	417.112	0.248104	748.888	11587.8	738.161	7.03446
1287	4373	895	72.7687	0.00333695	0.0251234	418.662	0.242403	4941.03	387.02	13308.9	7.50646
1288	5209	727	49.3063	0.00766752	0.0113712	419.123	0.242993	4779.97	376.274	13101	7.55504
1289	5182	772	53.4486	0.00989262	-0.0022473	420.569	0.227015	5937.79	18555.2	8283.95	7.82299
1290	5921	593	49.979	0.00400904	-0.00910824	420.967	0.277949	6334.2	18918.1	7907.42	7.95534
1291	5901	581	57.9692	0.0122756	-0.0543911	420.918	0.440479	6526.19	18728.3	7668.59	11.2368
1292	6139	660	67.2141	-0.00456676	0.0228681	421.339	0.300977	6742.35	19221.1	7509.18	8.0073
1293	5726	624	56.9989	-0.0381128	0.150159	418.602	0.346579	4541.5	15406.6	5547.4	6.67912
1294	5673	1188	57.4258	0.00485253	-0.0207207	418.778	0.353826	4518.25	15334.2	4603.63	9.76944
1295	5545	174	22.1495	0.0276699	-0.0141154	417.338	0.299168	115.9	12375.3	359.033	10.1727
1296	4487	645	63.6705	0.0347444	0.0251422	417	0.293643	268.627	12207	570.419	9.03758
1297	4760	801	51.5925	0.000390932	-0.00372429	417.139	0.283837	173.39	12074.9	217.188	9.27147
1298	6136	1143	68.5182	0.0549358	0.000804709	417.283	0.283621	226.142	12181.4	211.21	8.70381
1299	5126	872	42.6356	0.00769015	0.0110572	419.405	0.245464	5024.47	445.532	13208.2	8.13588
1300	5837	417	54.4743	0.0394969	-0.0330339	419.72	0.247996	4890.26	561.214	13054.5	8.84718
1301	4625	533	44.8729	-0.0527067	0.00902169	417.317	0.253729	1185.15	12919.3	1242.4	7.327
1302	4519	476	45.9605	-0.000570852	0.04793	417.621	0.231998	1759.96	13367.3	1713.4	6.93803
1303	4725	285	49.0619	-0.0587705	0.0276492	417.899	0.195478	1765.98	13667.9	1749.39	6.91545
1304	5356	845	45.7518	0.0220753	-0.0213815	417.522	0.215425	1419.83	13174	1380.1	7.15553
1305	4636	370	46.2434	0.00441019	-0.0618075	417.927	0.161368	1620.02	13644.1	1596.23	6.91268
1306	4631	657	56.3067	0.0105432	-0.000567887	414.612	0.266758	378.694	9425.49	287.472	9.74583
1307	4197	1007	40.2722	0.00799489	0.00182205	415.263	0.282771	921.722	9823.62	751.303	9.48039
1308	5126	426	47.7308	0.022553	0.0120228	416.489	0.280552	1513.52	10635.8	1407.19	7.65638
1309	5134	1161	44.8245	0.0223416	0.0923005	416.966	0.28049	1426.72	11039	1457.2	6.60391
1310	5301	925	44.8194	0.00548455	-0.0583015	417.283	0.307698	2735.28	10550.2	2474.86	9.05923
1311	4628	324	46.8701	0.0331846	-0.0532351	417.159	0.285722	2570.19	10547.4	2356.62	11.5253
1312	5622	1591	68.3241	-0.0115708	0.0226173	418.893	0.179355	6682.7	1708.56	14319.5	6.91343
1313	5324	1477	67.5558	0.0101556	0.0157673	419.097	0.186142	6468.34	1675.67	14208.8	7.7898
1314	5142	551	47.0419	0.0481222	-0.0845938	419.122	0.185043	6022.41	1253.62	13993.4	9.427
1315	5638	1512	67.2715	0.017323	0.0364027	418.892	0.185026	7285.29	2267.01	13765.1	6.59701
1316	4624	701	52.9758	0.006248	0.00213277	420.154	0.434282	6478.57	17441.7	6708.19	9.86016
1317	4889	564	43.1564	0.0076383	-0.0191107	419.979	0.421735	6299.28	17259	6683	9.26304
1318	5669	447	55.2395	0.00338312	0.00832139	420.089	0.411899	6385.02	17333.9	6482.92	9.96431
1319	5878	455	54.8276	-0.00888745	-0.0023515	419.876	0.403592	6147.25	17098.8	6591.19	9.0332
1320	4561	828	56.3401	-0.0218032	0.00288818	420.005	0.250894	4731.64	665.672	12877.4	8.44058
1321	4181	822	65.3584	-0.00786576	0.0335804	419.569	0.243283	4307.77	258.833	12666.2	7.38279
1322	4395	460	45.4745	0.00800131	0.00954452	419.687	0.243504	4575.59	177.212	12833.5	8.02752
1323	5968	712	55.637	0.0201993	-0.0305551	419.883	0.244089	4328.01	149.802	12610.6	7.76584
1324	5585	636	36.797	0.00325971	0.0118067	421.161	0.440479	6766.4	18954.2	7439.74	7.87222
1325	5864	1048	64.3958	0.0130927	-0.0066604	421.445	0.440479	6958.88	19318.9	7293.34	7.66761
1326	4452	837	58.6595	-0.0082368	0.0102817	420.435	0.440479	6628.07	18037.1	7545.51	8.25631
1327	4292	874	63.5355	0.00642688	-0.0118233	420.79	0.440479	6879.74	18404.6	7295.23	9.3204
1328	4051	191	43.1564	0.0245019	-0.0150043	420.774	0.440479	6929.78	18347.8	7259.9	8.46812
1329	5967	1312	64.3208	0.0103997	-0.00154345	419.281	0.36913	4907.53	15903.9	4627.13	8.53609
1330	4369	1019	69.511	0.000961919	0.0573993	417.006	0.272341	223.904	11839	205.541	6.69987
1331	4603	1109	43.7112	0.041333	-0.0322662	417.302	0.277845	460.757	12009.1	307.78	8.61852
1332	5845	933	51.424	0.00780165	0.00941196	414.972	0.274025	627.369	9792.86	372.734	10.2753
1333	4734	1171	65.2896	0.0256559	0.00314323	415.504	0.271107	954.053	10196.2	590.886	7.75419
1334	4801	680	45.1208	0.0115863	0.0115863	415.059	0.253494	486.915	9972.19	241.772	8.85752
1335	5028	1260	72.0517	0.00275891	0.070099	415.95	0.24551	656.599	10612.3	358.874	7.62984
1336	5835	181	20.3653	-0.0210948	0.0498929	416.202	0.242236	825	10806.6	658.692	6.4488
1337	4519	517	44.321	-0.0166594	0.0157481	416.147	0.265022	1104.28	10614.6	883.727	7.63822
1338	3375	898	62.3794	-0.0211719	-0.010198	416.525	0.263567	1095.09	10876.3	1057.34	7.79132
1339	3760	574	63.6344	0.0322529	-0.00405794	416.946	0.27548	1258.09	11132.3	1316.56	7.52483
1340	4183	688	67.691	-0.0276348	-0.00199375	417.006	0.246299	1069.48	11297.2	1131.6	7.04773
1341	6011	997	63.7191	-0.0279062	0.00295795	417.327	0.274904	1433.75	11385.4	1421.94	6.95054
1342	5591	502	55.8506	-0.0174017	-0.0141811	417.213	0.317343	2877.65	10396.5	2470.66	7.28958
1343	5678	289	41.9189	-0.00387095	0.0137657	418.73	0.34284	4318.04	15209.6	4313.39	8.16029
1344	4000	368	39.6141	-0.00244536	-0.0218457	418.815	0.335872	4375.45	15330.9	4354.82	8.59123
1345	4770	1029	52.4379	0.00833391	-0.0212957	418.928	0.335872	4318.52	15419.3	4287.18	8.97849
1346	5408	712	62.3209	-0.00152838	-0.0336271	417.757	0.344492	3059.68	13940.4	3098.29	6.99178
1347	4519	726	45.9611	0.0207138	-0.022496	417.461	0.263207	1938.06	13311.2	1905.05	8.03661
1348	4390	302	48.3728	0.00399347	-0.0093205	418.115	0.274472	2698.29	14162.7	2778.06	7.68945
1349	4203	673	43.1684	-0.0202303	-0.00090667	418.163	0.207569	2418.33	14182.5	2493.79	7.59341
1350	4944	655	47.6177	-0.0131269	-0.00633679	417.978	0.213017	2091.49	13831.3	2116.62	7.67737
1351	5670	683	62.5061	0.00594677	-0.0224483	418.383	0.131344	2169.7	14255	2283.63	7.14006
1352	5437	433	53.5344	0.0127557	0.0114786	420.185	0.248748	5091.15	1177.88	13095.9	8.88662
1353	4740	610	48.1259	0.0138585	-0.0247218	420.238	0.250623	4568.47	664.141	12718.8	8.87491
1354	3375	1305	61.8537	-0.0567417	0.0173324	420.389	0.259819	3034.23	1131.16	11725.7	6.81135
1355	4740	91	36.6609	-0.0127637	-0.0118818	420.833	0.240565	2849.83	993.305	11498.2	7.20444
1356	4156	921	67.1395	0.0164673	0.0089851	421.084	0.440479	6857.66	18784.4	7325.59	8.328
1357	5830	742	64.1653	-0.0205953	0.00162697	421.406	0.440479	7165.18	19098.1	7025.21	7.38542
1358	4530	375	41.0138	0.0407465	-0.0024634	418.368	0.328105	3534.6	14668.4	3607.19	7.35993
1359	4493	941	57.7748	-0.0551426	0.0806599	418.776	0.2673	3248.68	14955.9	3273.82	6.542
1360	6027	981	60.0712	-0.0247004	0.0894971	417.844	0.331947	3324.89	14100.4	3386.93	7.00548
1361	4292	785	56.5843	0.00102466	-0.0204178	418.222	0.304337	3251.32	14456.1	3344.45	7.58706
1362	4634	130	17.4784	-0.0683822	0.0465276	417.864	0.189129	1197.31	13402.5	1114.22	6.43973
1363	5888	970	61.0499	-0.0263545	0.0655522	417.813	0.27454	789.277	13169.2	686.577	6.8924
1364	4596	689	61.2194	-0.00352711	-0.116509	418.145	0.191463	986.259	13596.1	946.52	7.25838
1365	5046	924	45.0279	0.0394156	0.0579341	417.243	0.293643	536.404	12563.9	807.552	7.13628
1366	5483	17	20.6775	0.0260544	0.0370774	417.631	0.282433	663.734	12954.2	672.425	7.00959
1367	5639	818	33.3246	0.0202249	0.0135772	417.778	0.349567	173.639	12758.4	222.564	8.96409
1368	5936	735	59.6998	-0.00101671	0.0716049	417.702	0.288439	672.191	12311.1	343.814	6.92241
1369	3956	704	69.6037	-0.0335678	0.0144432	417.675	0.298433	3253.17	10500.9	2912.97	7.8422
1370	4640	9	7.22767	0.0172056	0.0718793	419.551	0.188656	6614.35	2150.36	14206.7	6.06182
1371	5636	805	56.63	-0.0359408	0.055966	420.117	0.188656	5723.94	1778.26	13539.9	7.9659
1372	5483	453	58.221	0.03717	0.00855046	419.747	0.188656	6473.41	2164.19	14041.9	7.79457
1373	5799	875	58.7752	0.0270947	0.0203607	418.105	0.327923	201.965	13114	108.381	10.436
1374	4634	1082	62.0622	0.0966851	0.109031	418.145	0.270859	485.195	13331.9	374.766	6.85196
1375	4655	527	52.8081	-0.00453786	0.0169046	416.457	0.280158	1653.77	10484.8	1511.8	8.86263
1376	4690	134	38.1257	-0.0599062	-0.0305852	417.529	0.281945	1796.32	11339.1	1766.03	6.90705
1377	3901	1307	45.3194	0.00377986	-0.0252688	416.991	0.281093	1857.8	10868.4	1771.69	7.58719
1378	4333	814	52.9519	0.0103415	0.037502	419.339	0.215083	5691.89	1115.88	13704.3	7.3977
1379	5590	537	53.0569	-0.0887436	-0.012612	419.188	0.188656	7263.09	2482.2	13735.9	6.65229
1380	4685	1014	58.391	-0.00848096	-0.00271964	419.605	0.199887	5839.36	1460.4	13753.6	8.1463
1381	5894	217	16.6326	0.0217484	-0.0122022	419.366	0.193463	6916.37	2282.94	14019.3	7.5788
1382	4967	717	57.6578	0.00661325	-0.0161788	419.853	0.234594	5344.44	1174.86	13344.4	8.48185
1383	3333	874	64.0509	-0.0529219	0.0602469	419.552	0.188656	7289.12	2756.63	13661.8	6.46112
1384	4635	1130	49.7996	-0.0799115	-0.0379362	421.811	0.22866	1724.68	2586.68	10593.1	6.12995
1385	4420	797	51.3896	0.00160013	-0.0182411	422.228	0.22866	1504.67	2597.8	10373.4	6.76926
1386	5711	118	20.4594	0.00655887	0.00919446	419.408	0.4028	5376.73	16256.9	5279.11	8.25722
1387	4655	488	44.8698	0.0247876	-0.0369408	418.43	0.360675	3727.14	14765.6	3793.06	9.46723
1388	4369	1007	50.9479	0.0279405	-0.0523064	418.58	0.374215	3773.07	14948.2	3800.58	9.37251
1389	4640	598	50.782	-0.0222694	-0.0206233	418.915	0.373801	3414.53	15158.1	3406.96	6.58374
1390	5863	617	58.7386	0.0704198	-0.0777284	417.927	0.295019	653.787	12486.4	395.027	8.10683
1391	4811	1103	63.6062	0.0265733	-0.0158649	417.858	0.319318	450.266	12559.9	281.348	8.35499
1392	4226	943	52.1626	-0.070004	0.0205309	418.07	0.275223	1242.33	12282.4	952.693	6.697
1393	4156	1281	37.1955	-0.00785078	0.0432956	417.387	0.267876	970.171	11724.9	862.441	6.92668
1394	4800	1151	36.6878	-0.00555496	-0.0685179	417.571	0.271647	927.693	11955.1	723.551	8.14672
1395	4149	712	65.808	-0.0117229	-0.0176274	417.855	0.27076	1368.29	11983.4	1144.4	7.58307
1396	5983	304	50.6763	-0.0192597	0.0548144	422.758	0.22866	1194.48	2809.12	10061.5	6.4064
1397	5495	725	30.1363	0.012169	0.0125431	420.602	0.425409	7042.78	18020.6	6773.43	8.23631
1398	5847	1144	67.6771	-0.0176225	0.054394	418.207	0.129418	1602.38	13917.9	1654.16	6.82125
1399	5848	1016	67.282	-0.118152	0.0456335	418.354	0.129418	1643.66	14077.5	1740.09	6.28004
1400	5788	895	65.9014	0.0289349	-0.160366	418.562	0.130125	1515.28	14241.3	1673.25	6.98336
1401	5519	1791	69.8559	-0.023434	0.00866478	418.473	0.154483	1262.77	14029.4	1364.98	6.85564
1402	4200	107	36.7414	0.043355	0.0238077	418.403	0.258848	470.594	13584.3	445.554	8.2633
1403	4187	53	16.5866	-0.0705102	0.143482	417.441	0.271626	1244.94	11602.2	1169.98	6.40224
1404	4982	1316	51.9722	-0.0250803	0.0489938	417.733	0.282027	1759.5	11579.9	1664.88	7.45925
1405	5755	18	13.04	-0.0149497	-0.0493877	417.766	0.27826	1613.52	11690.8	1493.47	7.75372
1406	5483	403	55.1913	-0.0469723	-0.0258083	417.8	0.273711	1480.24	11808.5	1319.32	7.489
1407	4172	911	33.472	-0.10413	-0.0510435	421.234	0.316123	2040.53	2750.49	10902.7	6.66769
1408	4273	941	33.6324	-0.182424	0.111403	421.773	0.240131	1786.34	2655.98	10653.9	6.2933
1409	3975	719	68.235	0.0385856	0.00480971	422.246	0.230164	1464.67	3071.51	10313.5	7.51061
1410	6297	1098	66.6707	-0.0297033	-0.0108217	421.498	0.293142	1879.39	3168.19	10714.5	7.03396
1411	4178	80	23.1975	0.0138651	0.0225071	420.644	0.287746	6790.7	17712.1	5726.24	7.96243
1412	4351	1395	68.9317	0.016933	-0.0253951	418.76	0.390857	3879.13	15147.5	3877.93	8.8292
1413	5779	78	24.2311	-0.00369576	-0.003159	419.22	0.350373	3642.83	15505.5	3591.35	6.88767
1414	5377	834	41.8627	0.00191322	-0.0258646	416.403	0.282914	2025.52	10246.5	1729.06	9.81782
1415	5641	843	68.6635	0.0323147	-0.0129528	418.011	0.282454	2204.93	11441.7	2251.09	7.29629
1416	5626	943	42.08	-0.00220631	-0.0112282	417.194	0.283102	2192.08	10818.1	2173.11	7.90693
1417	4943	1044	63.1834	-0.00320195	-0.0119343	420.573	0.242141	4994.11	1396.24	12933.7	8.28727
1418	6101	612	39.055	0.0459195	-0.163957	421.016	0.256318	4660.1	1374.62	12609.6	11.9617
1419	3333	370	55.4838	0.00829962	0.004349	420.72	0.252518	4315.33	799.715	12434.4	8.36735
1420	5293	927	34.5607	0.0330008	0.0988445	419.942	0.250869	3892.96	390.484	12319.6	6.52164
1421	5873	31	19.2229	-0.00430861	0.0507721	420.237	0.24962	4139.05	269.075	12411	6.69318
1422	6013	729	60.8867	0.0167585	-0.00474688	420.716	0.254617	4050.89	500.364	12250.7	7.90953
1423	3867	1017	45.8489	0.0208327	0.008487	420.696	0.252629	3890.89	376.142	12149	7.38629
1424	4727	1130	42.8305	-0.0195245	0.086957	418.33	0.283433	749.66	12771.4	661.563	7.12639
1425	6007	829	48.2018	0.0917947	-0.0440078	418.454	0.285507	789.373	12913.9	770.286	8.88604
1426	4950	734	59.0731	0.0308368	-0.0741015	418.24	0.288974	1248.82	12429.3	1022.97	8.01307
1427	6032	841	63.1181	0.00725816	-7.20922e-05	421.071	0.255111	4743.13	1544.6	12635.3	8.09312
1428	3989	1427	43.0876	-0.0179434	-0.0472643	421.119	0.254461	4908.19	1761.11	12724.8	7.90872
1429	4655	786	54.8057	0.00892272	0.0364359	420.595	0.243027	3650.88	335.63	12017.2	6.91932
1430	3403	1025	45.2542	-0.00939041	0.0373468	420.825	0.250823	3791.37	381.634	12042.8	7.12542
1431	3403	1075	56.9857	0.0225049	-0.0136503	421.363	0.257304	3561.9	516.134	11779.8	7.13313
1432	3949	357	59.5548	0.00083134	-0.00141333	420.504	0.416364	6722.08	17656.9	6138.79	9.6647
1433	4963	801	49.1151	0.00154802	-0.0107977	420.844	0.222126	7023.15	17948.4	5828.54	8.84873
1434	6214	1004	60.8574	0.0409582	0.0306701	420.988	0.170883	7094.43	18011.5	5471.82	7.70408
1435	6466	990	63.0408	0.00403035	0.00608796	420.523	0.352747	6844.25	17783.2	6183.64	8.47664
1436	5618	432	65.3415	0.00415354	-0.0232813	421.082	0.170883	7264.89	18190.1	5736.47	8.23102
1437	4015	1009	66.1918	-0.00811937	0.0134856	419.971	0.411604	6167.33	17094.6	6079.44	9.71754
1438	6045	108	17.8616	0.00913413	-0.0200466	420.088	0.412395	6325.02	17260.4	6245.18	9.29518
1439	3450	1170	59.7135	0.0251227	-0.00857767	420.281	0.418556	6409.97	17328.9	5746.31	8.5841
1440	3450	350	48.0366	-0.0239192	0.0389315	420.634	0.166305	6690.13	17594.7	5238.08	6.89513
1441	3333	676	58.9914	-0.00118787	0.0735917	418.611	0.183324	732.758	13958.1	866.103	7.15892
1442	4655	782	48.5403	0.145838	-0.027589	418.883	0.164974	728.2	14215.6	968.275	7.57828
1443	3333	822	52.2951	-0.0119167	0.0374661	419.749	0.188656	7117.83	2766.3	13822.9	6.75203
1444	4966	701	48.8152	0.0176123	0.00595252	420.331	0.198657	5960.97	2064.05	13630.4	7.63651
1445	6083	538	44.3913	0.0135715	0.0399464	420.108	0.179432	6432.8	2408.86	13940.6	7.27355
1446	5951	527	43.8298	-0.00547468	0.00819375	421.342	0.252621	4852.76	1822	12646.2	8.9801
1447	3633	548	62.8286	0.0155674	-0.0253978	420.499	0.169732	6169.08	2445.14	13703.5	8.49533
1448	4475	388	59.4465	0.00589727	0.0137775	421.288	0.242314	3347.72	272.194	11649	6.79899
1449	5731	505	56.5633	0.0453628	0.00832576	421.191	0.231716	3221.52	269.463	11619.6	7.27673
1450	5802	971	58.0513	0.00235862	0.00400472	420.354	0.310872	6356.82	17262	5157.92	7.907
1451	4305	818	66.5748	-0.07474	-0.0659217	418.616	0.129418	2087.86	14471.9	2224.79	7.09001
1452	4486	1496	68.4711	-0.00748577	0.137233	418.74	0.129751	1570.26	14417.1	1741.23	6.23255
1453	5502	1181	64.3517	0.0356598	-0.052406	418.98	0.138079	1152.91	14498.4	1317.61	7.19248
1454	4561	1115	41.1146	-0.0364308	-0.129858	418.968	0.129418	1772.63	14713.4	1850.25	6.65974
1455	5748	497	54.1106	0.0230862	0.00148123	419.005	0.256986	57.9897	13967.7	342.506	8.8297
1456	5628	1960	69.3021	0.124484	0.0812738	418.703	0.256986	261.992	13780.3	377.4	9.94179
1457	4209	1631	48.1642	0.0469048	0.00678136	418.848	0.256986	56.4368	13778.4	177.884	8.4473
1458	3846	881	50.7852	0.0119552	-0.0234357	416.349	0.282232	1874.84	10254.2	1653.8	9.16249
1459	3333	397	68.0533	-0.0104008	0.0227081	416.889	0.282419	1911.21	10728.3	1833.02	7.74495
1460	4644	831	72.4832	0.0357897	0.0249873	418.139	0.290206	2079.68	11658.6	2106.73	7.25712
1461	4081	67	19.6094	0.0101588	0.0244038	417.665	0.284109	2107.61	11233.8	2119.9	8.02797
1462	4257	1492	46.9809	-0.0340486	0.0573094	418.48	0.284677	1972.82	11770.6	2446.79	6.47063
1463	4997	476	37.2018	-0.00631226	-0.0157185	417.929	0.257159	3241.46	10538.5	3180.69	7.05642
1464	4310	473	40.5167	0.0325823	-0.0384054	418.224	0.262785	3050.67	10746.3	3420.86	9.00639
1465	4580	603	55.6313	-0.00718835	-0.0224389	421.982	0.268529	3026.73	505.295	11273.9	7.35806
1466	3321	541	58.9801	0.00664256	0.012466	420.912	0.298713	7194.4	18138.2	6110.91	8.10202
1467	5305	2343	70.666	0.012861	-0.00565751	421.402	0.170883	7625.8	18558.2	5685.89	7.48001
1468	4113	985	59.9158	-0.00242419	-0.00326594	420.108	0.392258	5588.6	16782.2	4365.88	7.64554
1469	3849	497	54.1686	0.012089	0.012089	419.56	0.41208	5286.19	16260	4709.15	7.81474
1470	5486	414	38.9062	-0.0021874	0.00192782	417.556	0.315576	2801.14	10822.7	2795.99	8.01855
1471	6332	2008	61.8505	0.00834739	-0.0309343	418.089	0.315576	2742.77	10997.8	3039.59	8.71137
1472	4108	1212	42.0808	0.0814351	0.0690895	422.028	0.271781	3405.48	907.431	11525.5	8.09694
1473	3403	485	60.8554	0.225378	0.0494518	422.204	0.271781	3473	1135.33	11517.3	8.64902
1474	5603	563	36.5312	0.0116078	0.0133715	422.751	0.230784	1238.3	3505.82	10050.8	8.03787
1475	5875	1127	59.3044	-0.00230534	-0.0052102	423.383	0.225211	1018.63	4117.39	9667.23	7.95184
1476	4352	1030	44.203	-0.019544	0.0580574	422.35	0.219387	1406.73	3673.17	10172.8	6.56207
1477	4937	1667	66.529	0.0419825	0.0307591	423.673	0.243642	755.958	3827.14	9509.36	9.54891
1478	4600	673	53.4806	0.0037004	-0.0283984	421.85	0.348761	7504.11	19529.8	6716.83	7.99086
1479	4551	1245	49.0117	0.105959	0.0936135	422.194	0.170883	7911.39	19802.4	6310.06	6.60625
1480	6127	766	58.8763	0.00584346	0.120041	422.165	0.170883	7965.62	19756.9	6240.82	6.83983
1481	6175	985	68.1533	-0.00514999	0.010723	421.004	0.440479	7096.11	18613.1	7034.11	7.44981
1482	5486	665	54.3884	0.00305611	0.00614254	421.283	0.383526	7338.15	18819.9	6831.96	8.13191
1483	4655	416	48.408	0.0264255	-0.0316718	420.91	0.424748	7151.45	18397.9	6969.8	9.38093
1484	4399	693	67.9761	0.0994135	0.00417542	422.072	0.170883	7933.76	19595.5	6253.78	6.89534
1485	6102	725	57.9083	0.00251677	-0.00272079	420.161	0.372566	6011.48	17002.4	4938.48	8.35823
1486	4071	523	53.3945	0.00435312	-0.0131605	419.489	0.31146	4192.74	15902.3	3903.3	8.11728
1487	5030	798	68.1277	0.0348748	-0.0233262	418.421	0.296561	1785.39	11977.3	2058.62	8.18959
1488	4850	51	13.2573	-0.00013165	-0.00792892	418.549	0.294875	1411.52	12402.8	1513.38	7.70958
1489	5954	510	63.0973	-0.000454438	0.0524005	418.519	0.296006	1660.76	12118.5	1954.73	7.28811
1490	5946	1275	66.5297	0.0132635	-0.000453899	420.977	0.207591	5677.86	2337.34	13292.5	8.03858
1491	4644	1022	54.9493	0.0225262	-0.0175972	421.42	0.256318	4098.92	1163.4	12123	8.59823
1492	4654	1213	66.8666	0.0134363	0.0196091	421.425	0.262435	3963.25	1066.57	12021.5	7.59969
1493	3403	520	70.2668	0.116758	-0.0876315	421.948	0.259101	3869.17	1362.63	11827.9	8.04053
1494	4650	1025	63.2124	0.0457931	0.02604	421.523	0.268104	3762.47	853.092	11888.6	6.93207
1495	4927	67	21.0653	0.122134	0.106421	422.037	0.271781	3661.18	1211.84	11674.9	7.76149
1496	4155	750	47.68	0.0052225	-0.00918079	423.785	0.243642	633.473	3364.68	9482	10.7282
1497	3985	283	47.2964	0.00869473	-0.00365095	423.641	0.243642	667.224	3487.78	9501.65	8.73797
1498	4955	1547	69.3638	0.0294253	0.0135523	425.286	0.224446	527.621	7595.18	9294.51	8.58414
1499	3330	734	61.805	0.0369449	0.0235704	426.335	0.205007	150.739	8274.93	9040.08	8.03059
1500	3308	539	66.0701	0.0929336	0.00445625	426.627	0.211641	194.294	8188.19	8842.05	8.38001
1501	4655	5	4.06173	-0.00312435	-0.00621077	419.934	0.358073	4730.82	16434.3	3922.81	7.70968
1502	4923	212	34.3285	-0.00500726	-0.00637901	419.72	0.279952	3922.36	16031.3	3660.92	7.38853
1503	3950	1163	61.5417	0.152338	0.0782639	419.232	0.201752	322.924	14344.8	583.725	8.74956
1504	3783	918	50.6939	-0.0278281	-0.0130133	422.245	0.235861	1645.44	2088.81	10461.9	7.639
1505	6001	1512	69.1253	-0.00875251	-0.013616	422.529	0.240108	1590.8	1968.11	10349.7	7.17127
1506	3973	593	45.6087	-0.0238577	0.000833618	422.501	0.237753	1453.12	2298.28	10286.9	7.63264
1507	5959	1518	66.0036	0.0188868	0.0476934	423.07	0.244274	1149.93	2433.92	9981.78	7.42738
1508	5960	1446	74.1673	-0.145356	0.0367431	425.714	0.224032	279.327	7833.61	9182.47	6.69957
1509	3977	912	40.0897	0.0255494	0.0173189	426.694	0.180163	255.633	8122.04	8770.9	10.0996
1510	4141	1439	35.4574	-0.00114254	-0.0104018	426.273	0.211639	136.698	7745.79	8808.92	7.54763
1511	3567	834	55.6294	0	0	427.392	0.091672	552.92	8821.13	8761.21	13.245
1512	6191	665	55.7189	0.071384	-0.00269008	426.398	0.213329	120.877	7833.64	8805.83	8.20346
1513	5660	283	41.5331	0.00225248	0.0239809	418.715	0.291609	1185.91	12757.4	1303.47	7.32308
1514	5989	986	60.7176	0.0367183	-0.0341069	419.04	0.288132	963.224	12973.8	1499.94	8.03103
1515	4639	1429	72.489	0.00690747	0.0171955	418.421	0.288902	1854.71	11883.1	2145.52	7.59457
1516	6121	642	58.7841	0.0134616	0.000234112	417.59	0.282845	2313.63	11005.8	2313.56	8.82309
1517	4133	664	73.1701	0.00949634	0.0118969	418.249	0.282667	2266.17	11438.6	2602.04	7.81057
1518	3428	251	33.1424	0.00782892	-0.0142633	417.768	0.285421	2582.94	10983.4	2680.52	8.23512
1519	6113	670	60.2768	0.0177937	0.0202628	418.5	0.289641	2314.5	11442.5	2965.43	7.02892
1520	3716	936	63.7965	0.0336986	0.0114764	418.722	0.305957	2262.55	11504.1	3136.25	6.62058
1521	3653	949	60.0683	-0.0448974	0.136173	418.922	0.283019	2012.29	11753.7	3058.3	6.01764
1522	5039	574	41.3333	0.0627867	0.0228448	421.916	0.255409	4241.77	1687.55	12077.4	7.82293
1523	4377	848	50.2023	0.00101306	-0.0127571	422.885	0.234867	1841.66	1419.58	10352.1	7.40513
1524	5408	756	36.2961	0.0218179	-0.00493106	422.151	0.228984	2056.45	1300.22	10681.8	8.73061
1525	5618	731	66.9095	-0.060047	0.0274951	420.866	0.247011	2627.7	1381.23	11377	6.87096
1526	5983	70	20.5149	-0.0202748	0.00750297	421.151	0.238601	2584.7	1261.11	11295.6	6.89804
1527	4073	1585	49.5994	0.0434604	-0.0380211	421.778	0.225462	2153.93	1410.61	10858.5	7.76971
1528	5686	255	46.134	-0.00332132	0.0137072	422	0.235944	2179.11	1365.27	10814.6	8.20598
1529	5622	2209	71.2852	0.012813	0.0163403	425.112	0.225684	665.191	7398.44	9303.66	8.29011
1530	4949	139	30.2817	-0.0114982	0.0290661	426.168	0.213854	189.726	7668.75	8841.65	7.34269
1531	3941	199	52.1851	0	0	427.272	0.0974903	521.414	8475.33	8620.58	13.9007
1532	3321	558	72.5324	0.00445153	-0.000486739	425.51	0.220074	279.08	6816.14	8906.09	7.76397
1533	4860	1266	58.0532	0.00629854	0.00576178	425.801	0.214862	291.025	7112.99	8842.33	7.96684
1534	3321	570	52.5244	0.013516	0.0390304	426.241	0.209199	201.911	7471.19	8734.3	7.97462
1535	5155	463	48.7698	0	0	427.035	0.177838	270.83	7909.4	8486.59	14.2524
1536	5775	858	35.5465	0.0679728	-0.0678297	421.448	0.256318	4923.86	2012.17	12644.2	8.08597
1537	3450	773	55.7162	-0.0572612	-0.0335987	421.734	0.256111	4895.03	2147.93	12558.5	7.00585
1538	3381	365	42.5615	0.0131648	0.0145365	421.924	0.256318	4555.69	1975.91	12280	7.64591
1539	3767	756	41.8843	-0.0131137	0.0318598	421.044	0.235625	3093.4	509.169	11560.6	7.45456
1540	5811	672	69.7757	-0.0185384	0.0234369	421.133	0.235502	2999.05	583.253	11478.8	7.655
1541	4178	1303	56.7345	-0.012957	0.0429617	421.264	0.23464	3065.64	429.072	11478.6	7.46979
1542	6146	655	56.0427	0.00508949	0.0129125	421.934	0.232533	2480.39	910.903	10960.6	7.5432
1543	4655	1309	61.8572	0.0430987	-0.0595653	423.305	0.250463	1912.76	1306.95	10265.7	9.46365
1544	6021	801	62.4706	-0.0311755	0.0193046	424.948	0.237482	408.352	5836.51	8977.97	7.04944
1545	5486	773	71.9312	-0.0432315	-0.00773763	425.176	0.22016	309.223	6586.03	9019.75	7.15119
1546	5052	400	45.2119	0	0	427.527	0.0945812	647.501	8685.21	8587.69	14.2289
1547	3269	689	63.6442	0.132082	-0.165096	425.19	0.254841	406.896	5625.62	8802	8.94934
1548	6054	606	56.6032	0.05823	0.00781847	425.847	0.231082	175.393	6536.11	8657.22	8.78709
1549	3269	601	61.1333	-0.0260222	0.0287618	421.954	0.170883	8171.67	19101.3	5320.83	6.82475
1550	4839	565	55.2319	0.00790409	0.0507024	421.78	0.170339	7936.36	18858.7	5229.6	6.96615
1551	4024	1149	63.6912	-0.0343571	-0.0683077	421.198	0.170883	7338.79	18257.1	5454.38	7.58026
1552	5971	698	67.477	-0.0217353	-0.0411891	421.476	0.170624	7654.45	18578.5	5461.21	7.29057
1553	5724	767	64.128	0.0217285	0.0419305	421.528	0.166894	7614.63	18539.1	5140.74	7.02521
1554	4872	1073	58.6958	-0.00514604	0.117968	419.297	0.164566	726.708	14601.7	861.042	6.73599
1555	4659	657	53.8196	0.0749738	0.047343	419.566	0.160101	904.409	14943.8	906.966	6.81331
1556	4766	694	62.8753	0.0130084	0.021959	418.264	0.314596	310.113	12997.4	320.486	8.28103
1557	4223	1085	60.4411	0.0127594	-0.00856492	418.748	0.258972	503.998	13348.8	493.312	7.96986
1558	4742	908	63.0799	-0.00389367	-0.0063628	418.893	0.26982	749.402	13333.3	712.8	8.49506
1559	3269	759	65.7464	0.0234099	-0.0537506	418.431	0.26025	84.2106	13391.2	59.8263	12.8153
1560	3614	275	53.5032	-0.0430866	-0.0175722	421.396	0.225845	2294.39	1522.77	11057.8	6.59133
1561	3708	499	53.5347	0.0120229	-0.0003228	422.921	0.244535	1591.54	1736.56	10179.8	9.18913
1562	4845	1069	54.8892	0.0522409	0.0141751	424.078	0.265251	729.302	2561.49	9472.68	7.89329
1563	4467	1203	54.7505	0.0287208	0.0925068	423.936	0.260375	691.708	2656.83	9487.39	7.10979
1564	5800	429	39.2537	0.00874253	0.0646839	425.724	0.280178	246.202	5783.95	8518.89	7.9634
1565	3594	732	64.5336	0.0156129	0.0150155	421.237	0.262573	7619.51	18593.7	6286.58	7.83611
1566	4892	1154	64.9515	0.016074	0.0146631	421.978	0.170883	8287.89	19268.2	5760.92	7.06118
1567	3240	887	56.4959	0.00271724	0.0141133	421.159	0.296713	7436.53	18391.3	6148.59	8.11403
1568	5615	704	59.8496	-0.0156116	0.0152526	422.051	0.170883	8328.29	19270.9	5491.22	7.4866
1569	5216	1086	56.7566	0.0303907	0.0464401	422.269	0.170883	8565.34	19519.2	5463.04	6.53844
1570	5968	637	59.3469	0.0135566	0.0670546	420.991	0.169784	7063.58	17973.5	5250.45	6.83222
1571	5831	386	65.8593	-0.0070162	-0.11072	421.148	0.170883	7249.04	18161.2	5253.19	7.96509
1572	6133	870	62.6115	0.00411042	0.0576084	421.341	0.16739	7295.65	18272.6	4983.57	6.99555
1573	5892	1605	60.6995	-0.0312545	0.0461866	421.415	0.16767	7434.69	18384.3	5121.72	6.92115
1574	3568	1074	56.6916	-0.0195988	-0.0293454	421.082	0.166063	6975.46	17974.9	4840.47	6.90575
1575	4509	715	51.9622	-0.000684186	0.0172732	418.231	0.315576	2765.01	11001.9	3253.42	8.36295
1576	4923	380	50.0303	0.0564829	0.00161324	418.683	0.315576	2412.33	11368.9	3369.64	7.69353
1577	3613	1150	65.7847	-0.0532928	0.0439294	419.103	0.283465	2015.11	11770	3294.45	6.51232
1578	3347	635	55.3846	0.143149	-0.103765	419.082	0.283019	1249.31	12497.2	2205.03	7.63139
1579	5724	552	51.4005	0.00696771	0.00588475	419.265	0.286412	891.3	12901.2	1883.51	7.4719
1580	4858	639	56.5386	0.00115751	-0.0535162	419.126	0.220553	2819.36	11086.1	4188.92	7.63369
1581	4761	793	61.9785	0.00640271	0.00146444	418.841	0.237278	2728	11113.8	3835.63	7.96791
1582	3289	1184	67.3675	0.0419575	0.0296118	419.354	0.238006	2527.8	11374.7	4142.69	6.9547
1583	3319	650	49.6992	0.00305631	0.0384473	422.023	0.142211	5928.46	3248.16	13150.5	7.16871
1584	4934	573	54.5291	0.0121882	-0.0147479	422.18	0.256318	4824.77	2410.59	12368	8.68127
1585	5026	295	46.2866	0.0718623	0.0440845	422.436	0.256318	4655.81	2427	12181.1	6.62739
1586	3240	970	65.1568	0.0484135	0.0790649	422.793	0.254268	2944.24	1103.27	11019.4	8.09961
1587	3613	721	55.0276	0.108301	0.0471096	422.813	0.246684	3228.28	1351.14	11195.6	7.85756
1588	4562	709	50.9719	0.0319281	-0.0544917	422.665	0.261474	2766.49	860.185	10946.9	7.1058
1589	4646	974	66.7194	-0.0105738	-0.017261	422.981	0.254191	2655.56	1007.89	10806.5	7.42721
1590	3240	517	56.6699	0.0140242	0.0315471	423.971	0.257266	568.488	2996.84	9435.53	7.4938
1591	4713	796	60.6081	0.00139854	0.0131269	423.79	0.256492	697.28	2789.04	9549.03	7.69798
1592	4974	1205	64.7663	0.0453937	0.0105038	423.419	0.246558	820.26	3071.75	9683.61	7.61241
1593	4988	1178	59.8408	0.0319675	0.00645307	424.237	0.264439	408.281	3210.61	9259.49	8.99534
1594	5986	602	64.6073	0.0216701	0.00246575	421.815	0.166063	7694.45	18772.1	4845.56	8.10067
1595	4867	67	23.3611	0.0652342	-0.082914	421.936	0.169395	8018.64	18967.6	4987.99	7.56407
1596	5556	699	58.6792	0.000906787	-0.00350238	419.236	0.285507	716.558	13464.6	887.225	9.13281
1597	4738	958	56.0461	0.00668949	-0.0426932	418.464	0.315576	2731.28	11049.4	3429.6	9.32844
1598	4984	551	46.9365	0.0246389	-0.00348179	418.836	0.298488	2492	11316.7	3585.63	7.72217
1599	5720	913	64.7403	0.149746	-0.047785	419.378	0.283019	2081.07	11749.4	3664.11	6.76832
1600	3511	1306	66.1806	-0.127082	0.0646877	419.569	0.283019	1883.74	11950.7	3648.73	6.4724
1601	5243	446	53.6894	-0.0903398	0.193611	419.737	0.207397	7365.11	2990.62	13559.1	6.36381
1602	4669	197	35.8664	-0.0430825	-0.0406134	420.104	0.107551	7201.71	3090.29	13708.4	6.69281
1603	4910	1148	66.2331	0.00185525	0.0163796	420.651	0.110787	6846.23	3115.76	13893.8	6.90172
1604	4908	500	60.0417	0.00274002	-0.023715	421.413	0.187478	5816.26	2753.31	13264	8.78569
1605	5486	845	58.4322	0.0297401	-0.0330171	421.981	0.235811	5255.64	2638.58	12718.8	8.77973
1606	5271	564	54.5461	-0.000144995	0.0184605	421.14	0.173508	5978.35	2696.57	13385.6	7.12791
1607	4938	401	58.4053	0.0227383	0.011515	420.806	0.108269	6825.26	3234.04	13924.2	6.94584
1608	4669	921	67.545	0.0235369	0.0210677	425.619	0.303556	319.116	5347.26	8509.33	7.97591
1609	6055	950	72.3276	0.0264396	0.0483875	425.647	0.287748	311.247	5521.92	8485.17	8.03138
1610	4354	1214	57.8688	0.0356159	0.00210616	425.658	0.338805	253.836	5222.07	8487.96	7.86435
1611	3393	920	61.227	-0.000300784	0.0270744	421.078	0.35538	7377.13	18562.7	6745.16	7.35672
1612	3853	982	63.7922	0.0345106	0.00190531	421.343	0.299768	7662.26	18757.7	6463.38	8.27351
1613	5684	787	66.2723	-0.0341176	0.189476	422.235	0.170883	8239.23	19721.4	5943.54	6.02324
1614	3692	1142	74.204	0.0688797	-0.0414083	422.306	0.170883	8423.77	19721.5	5749.77	6.93947
1615	4407	1059	68.3432	0.0821532	-0.0735097	422.739	0.170883	8634.05	20193	5571.98	6.52586
1616	4832	488	43.6211	-0.0910305	0.166857	422.846	0.170883	8827.12	20301.6	5377.7	5.99136
1617	5140	549	48.6799	0.024258	-0.0549601	421.796	0.166063	7437.23	18715	4677.34	8.64162
1618	4733	1025	54.2022	0.0363615	0.0162998	421.823	0.136371	6182.19	3352.09	13376.9	7.46202
1619	3504	1036	72.1339	0.0484656	0.0450986	424.961	0.312122	265.222	4453.86	8812.23	7.23881
1620	5699	219	27.3939	0.0293286	0.0332568	425.192	0.316941	271.05	4694.07	8683.46	7.75977
1621	5631	155	22.0151	0.00725309	0.00725309	426.148	0.345098	331.153	4680.96	8203.26	11.4586
1622	3813	805	49.5033	-0.0604906	0.0135834	424.072	0.243642	828.611	4652.03	9288.71	6.84417
1623	6233	873	65.5219	-0.0733538	0.023167	424.305	0.243642	779.486	4824.49	9159.83	6.55037
1624	4147	1070	61.0609	0.0369657	0.0356661	425.558	0.329004	275.51	5063.15	8517.68	8.58614
1625	4421	1034	61.6679	0.0102935	-0.0288011	425.677	0.336502	266.911	4880.15	8432.37	8.59461
1626	5353	715	49.3373	-0.0541298	0.0146132	420.85	0.240902	6268.18	17619.6	4341.63	6.71937
1627	4673	972	65.0429	0.0224119	-0.0255463	421.204	0.202354	6255.36	17950.2	4066.34	7.18525
1628	6672	856	58.7549	0.0268083	0.0183206	421.356	0.166063	6775.11	18168	4441.5	7.19156
1629	4672	744	54.6634	0.0358461	0.00374731	421.572	0.166063	7108.82	18446.7	4596.64	7.76043
1630	4664	1928	69.9493	0.00701423	-0.0236031	421.599	0.174135	6694.65	18389.7	4188.04	7.99499
1631	3589	1046	57.6696	-0.00851953	-0.0898888	419.019	0.199239	2638.16	15014.4	2648.08	7.19813
1632	5320	494	54.8822	-0.0691055	0.117029	418.652	0.214912	2734.15	14710.6	2803.35	6.65813
1633	5595	565	55.9191	0.00642154	0.00536334	419.562	0.142531	2123.57	15369.4	2061.84	6.74142
1634	6300	849	63.9147	-0.0260806	0.0105582	419.349	0.15041	1849.18	15079.4	1834.45	6.68477
1635	5975	296	26.964	0.13491	0.0419055	419.864	0.155124	919.826	15199.7	847.965	8.51293
1636	4304	778	69.0468	0.0140658	0.0113223	420.128	0.166622	773.504	15359.9	664.51	9.38298
1637	4522	959	39.3475	0.0465638	-0.116576	420.048	0.147454	1498.22	15596.1	1390.15	8.5615
1638	3240	622	59.2131	0.00356125	-0.00525709	419.876	0.191401	584.823	15035.8	535.657	11.6148
1639	4640	668	57.9191	0.0339371	0.00862849	419.895	0.193613	285.518	14913	263.499	10.3286
1640	5267	686	51.4117	0.011495	-0.00290825	419.583	0.278413	267.554	14337.2	238.74	8.96938
1641	4674	1282	65.9752	0.000925903	0.0356767	421.244	0.211107	8339.06	4727.95	12668	7.07105
1642	3733	885	65.1156	0.00204645	0.0329106	421.162	0.242742	8607.86	4859.05	12406.3	7.21624
1643	3232	583	66.0013	-0.000779937	0.00136714	420.858	0.145835	7865.97	4120.13	13073.2	7.27483
1644	4602	1056	48.3264	-0.00276844	-0.0214034	420.788	0.198222	8280.93	4395.03	12667.8	7.01818
1645	4656	665	43.6676	0.0228316	0.00536696	423.274	0.253716	1367.6	2009.31	10031.6	7.5106
1646	3836	863	70.0629	0.019026	-0.00247934	424.247	0.268209	965.953	2308.49	9457.19	8.42017
1647	6302	1042	66.8496	0.0282381	0.0139171	424.751	0.303931	306.12	4241.4	8915.13	8.17984
1648	3369	1225	61.539	0.0359892	0.0418534	424.006	0.244321	628.533	4050.56	9325.59	7.07835
1649	4496	875	41.7521	0.0125673	0.00307065	425.732	0.344882	313.481	4305.93	8432.59	9.83345
1650	5143	2244	67.0774	-0.0355793	0.0918056	419.204	0.283019	1596.82	12163.6	2874.8	6.23049
1651	3733	259	62.6854	0.0232323	-0.027385	419.44	0.283019	1417.53	12347.5	2929.11	6.76361
1652	3724	1152	47.741	-0.00518074	-0.00204533	419.441	0.284882	970.985	12777.7	2333.15	7.75775
1653	5144	1031	64.4693	0.0239544	-0.0189306	419.783	0.268677	1014.46	12748.7	2850.98	7.59934
1654	5037	497	43.7282	0.0239335	0.0218758	419.948	0.277193	618.022	13134.1	2479.46	8.02143
1655	4855	1118	50.6213	0.00491171	-0.0230285	419.578	0.283019	1397.02	12377.2	3060.32	7.30519
1656	5682	1999	64.2399	0.00758223	0.0223285	421.745	0.142952	6472.81	3500.3	13491.9	7.55197
1657	4783	18	15.8078	0.000635201	0.00955153	421.908	0.212567	5539.65	2835.48	12930.2	7.40111
1658	3289	1265	70.0564	-0.00844456	-0.0164329	422.635	0.242263	4996.18	2834.64	12339.8	8.20887
1659	4451	823	57.0599	0.0125666	-0.0220013	422.435	0.236417	2609.11	660.529	10899.2	6.82028
1660	5133	2219	67.842	-0.0200834	0.0860894	423.22	0.248136	2431.47	1152.99	10585	6.40725
1661	4825	70	18.5817	-0.00079094	-0.0160996	423.441	0.245155	2342.24	1223.45	10490.1	7.80808
1662	4038	1100	50.8501	0.0315015	-0.00862195	422.618	0.230834	2479.43	774.25	10773.9	7.08655
1663	5475	16	9.21135	0.00627968	0.000106843	425.389	0.291636	263.167	3882.47	8584.68	11.1306
1664	5570	737	62.6182	0.00599234	-0.00326692	425.168	0.299857	219.355	3943.71	8699.84	8.72818
1665	5493	202	27.6328	-0.0337085	-0.000492702	420.226	0.18123	3428.39	16362.2	3052.22	6.66552
1666	3641	1308	61.6853	0.0121026	-0.000845261	420.542	0.152532	3300.54	16608	2716	7.28802
1667	4604	548	50.8242	-0.0432823	0.0428954	420.14	0.188764	2935.95	16130.2	2782.97	6.78348
1668	4545	1369	59.8408	0.0234099	-0.025091	420.204	0.152645	3020.83	16239.2	2861.22	7.53239
1669	4229	374	63.4572	0.00108531	0.00445231	419.008	0.265487	610.226	13562.6	430.929	7.41465
1670	5401	63	19.9831	0.0152333	0.0183197	419.097	0.268206	314.354	13675	388.164	8.18257
1671	5354	1964	62.7113	0.04152	0.052102	419.987	0.295087	163.729	13885.2	1307.07	6.78567
1672	4718	1161	61.2485	0.00847938	-0.010921	419.267	0.285507	759.6	13450.5	983.858	8.08931
1673	5367	2146	64.9924	0.00790327	0.000388511	419.379	0.287301	649.859	13430.8	1211.74	8.90857
1674	5346	1049	73.2994	0.00452238	0.0292137	421.54	0.15082	6017.05	3044.97	13346.4	7.09863
1675	5612	1449	64.3823	0.00139881	-0.0042992	422.014	0.176352	5762.83	3084.82	13050.9	7.70011
1676	5342	2062	67.2902	-0.0317271	-0.0440728	422.568	0.237335	5207.61	2982.84	12493.3	8.34273
1677	5324	2058	61.3644	0.0053089	0.0232662	422.944	0.241353	5033.13	3052.64	12260.5	7.96754
1678	4111	1188	40.5024	-0.0222806	0.0271021	424.095	0.24414	2618.4	1806.62	10431.8	8.15534
1679	3627	625	48.4939	0.0725421	0.0490853	423.678	0.24414	2563.17	1468.37	10550.9	8.37513
1680	5103	92	36.2873	0.00693678	-0.00920756	424.128	0.24414	2472.28	1751.1	10344.9	10.8696
1681	4623	1252	53.9635	-0.00230578	0.00592467	425.107	0.279074	199.662	3684.97	8796.5	8.82677
1682	5304	594	53.0244	0.0104783	-0.00433648	425.292	0.292936	264.882	3651.03	8681.09	9.7135
1683	5067	545	72.7763	0.00473251	0.00473251	426.245	0.319406	655.179	4183.71	8159.08	10.4932
1684	5019	521	56.1707	-0.0250354	-0.0250354	420.068	0.3	221.539	13532	1988.79	9.79292
1685	4675	1555	64.9046	-0.000351659	0.0351422	420.117	0.28323	426.895	13323.5	2388.42	7.55023
1686	5304	311	49.268	0.0402338	0.0931438	423.438	0.245217	4402.44	2806.89	11697.9	7.46453
1687	4303	754	40.7274	-0.116782	-0.0596835	422.906	0.251951	4397.39	2483.43	11873.7	6.96802
1688	4083	1011	54.5884	-0.00358719	0.00875849	425.972	0.329114	477.249	3780.96	8336.6	8.8134
1689	5400	86	12.3617	-0.014653	0.0266169	422.642	0.16623	8867.25	19948.6	5286.71	6.56278
1690	4714	957	68.3052	-0.0419995	-0.107843	422.457	0.170883	8699.85	19680.6	5279.76	7.14136
1691	3450	1305	69.1245	-0.0170982	0.0170898	423.056	0.11397	9066.85	20406.2	5128.09	6.03603
1692	4797	1211	67.4989	-0.00950692	-0.0979843	423.136	0.0881612	9217.74	20476.5	4972.19	6.4814
1693	4461	970	52.7142	0.0400926	-0.0162345	422.87	0.0970441	9162.2	20120.4	4929.31	6.71875
1694	4640	769	47.2874	-0.180599	-0.061772	423.148	0.0881612	9320.11	20433.3	4858.35	5.91561
1695	4309	231	37.6381	0.0343484	0.110667	422.037	0.162342	7877.79	19015.9	4749.42	7.045
1696	5922	661	56.3801	0.0648275	-0.0542201	422.291	0.0998694	7805.61	19212	4466.09	8.01918
1697	5051	1045	61.8578	-0.0436394	-0.0378972	420.837	0.210681	5413.37	17424.8	3665.49	6.97012
1698	5884	621	67.0313	0.00694611	-0.0682503	421.377	0.138776	5328.08	17894.3	3162.91	7.54827
1699	3848	762	60.1089	-0.0801555	0.01861	421.448	0.12567	5179.28	17892.5	3012.28	7.36308
1700	4814	496	44.4251	0.0115284	0.0142719	420.697	0.155394	3678.65	16850.1	2716.96	6.73889
1701	3859	642	70.7602	0.0289709	-0.119177	420.976	0.134982	3533.63	17052.1	2390.02	7.29399
1702	5705	1143	61.0899	-0.0233925	-0.0156765	420.137	0.3	83.5047	13707.5	1851.44	10.4678
1703	4481	668	53.7023	0.0209293	0.0814231	423.351	0.246426	4554.04	2893.61	11814.4	6.90797
1704	4856	796	65.2079	0.0989069	-0.160352	423.642	0.245217	4559.19	3040.13	11731.6	9.51007
1705	4821	683	48.9632	0.0226465	0.0103008	424.917	0.279571	251.786	3088.96	8959.83	8.8058
1706	4475	1067	56.0328	0.0102878	-0.0157753	426.04	0.34025	258.134	3590.16	8339.98	10.5304
1707	4548	1281	68.7251	-0.0287835	0.109488	421.169	0.197904	5820.71	17814.2	3736.29	6.32651
1708	5963	690	55.805	0.0377479	-0.0517583	421.525	0.133719	5692.86	18098.7	3355.04	7.46595
1709	4765	442	27.9435	-0.0302405	-0.0539822	421.769	0.118104	5912.47	18348.6	3364.21	7.14415
1710	4646	707	50.9515	0.00337475	0.0349248	419.426	0.27764	426.523	13880.6	479.75	7.62438
1711	5125	575	45.5009	0.0161647	0.00417177	419.787	0.288622	395.373	14059.2	742.657	7.95128
1712	5099	568	52.9478	0.00111787	0.0474142	419.763	0.245009	1396.26	12403.6	3326.07	6.9908
1713	3494	830	41.0342	0.022364	-0.000428017	420.114	0.269991	646.404	13116.7	2718.73	7.1911
1714	4418	782	43.0884	-0.0849999	0.0631482	419.556	0.283019	1718.83	12089.2	3426.92	6.61898
1715	5714	492	46.7941	0.0218547	0.00580532	420.122	0.244308	793.723	12984.8	2964.41	8.04017
1716	5958	798	62.9566	0.0078052	0.0386694	421.471	0.160467	7331.57	4137.58	13649.1	8.36495
1717	5333	2097	66.0737	0.0466069	0.0459896	423.586	0.240912	4128.96	2653.18	11479	8.47537
1718	5002	1205	50.1102	0.025153	0.0621901	425.742	0.326735	235.42	3148.4	8600.17	7.58458
1719	5758	282	37.9181	0.027209	0.0389935	425.495	0.313937	219.256	3143.33	8699.88	9.15682
1720	4820	830	51.3865	0.115819	0.00964609	424.941	0.271901	507.804	2759.86	9050.7	7.50693
1721	5339	2145	63.2202	0.00534188	-0.000830959	426.496	0.336621	448.251	3821.43	8096.97	9.41031
1722	5348	71	13.7284	-0.00176767	-0.0285166	419.636	0.287922	405	13552.1	1376.8	9.62035
1723	4390	1368	62.5908	-0.00557489	0.0753579	420.303	0.299318	177.977	14075.9	1528.34	6.8684
1724	5269	560	48.4818	-0.0175211	-0.033982	419.485	0.285507	557.956	13363.9	1432.65	10.4625
1725	5170	662	49.1022	0.00438489	0.00814227	420.22	0.298414	188.499	13890.1	1675.46	7.87549
1726	4677	978	73.5469	0.00350169	-0.0350786	419.761	0.289441	346.619	13475.6	1652.37	10.897
1727	4989	469	48.4002	-0.0879666	0.317196	423.572	0.245217	5206.52	3533.72	12168.8	6.00055
1728	5536	33	13.3719	-0.00483175	-0.00483175	422.539	0.232501	5519.39	3211.89	12717.3	7.5794
1729	5963	637	51.0159	-0.0340058	-0.243882	422.879	0.243991	5369.78	3276.43	12512.4	8.44683
1730	5070	505	47.8896	-0.0491125	0.0732219	423.176	0.243266	5061.06	3190.94	12209.5	6.60737
1731	5127	505	35.9555	0.0434852	-0.0944643	423.289	0.248745	5277.95	3433.16	12315.2	7.4009
1732	3967	236	47.9844	0.0647391	0.00808428	423.122	0.235002	3687.07	1999.68	11370.8	7.53513
1733	4272	645	45.8905	-0.00344275	0.0951267	423.198	0.240215	3315.21	1730.5	11123.9	7.17421
1734	4140	1245	60.4239	0.0123457	0	426.673	0.334699	547.441	3932.89	7984.76	9.75862
1735	6002	639	60.4177	0.0215156	0.040359	422.781	0.0881612	8333.13	19773.9	4367.61	7.11722
1736	3232	774	69.672	-0.0285939	-0.0302774	421.942	0.0929987	6677.05	18709.7	3910.97	6.90717
1737	3733	1301	57.853	0.011334	-0.042987	421.9	0.1071	6404.41	18578	3716.1	7.11612
1738	4624	685	49.8891	-0.0260069	0.00856103	420.582	0.159609	4139.44	16876.8	3039.43	7.36588
1739	4223	128	50.9101	0.011639	0.0309806	421.137	0.134982	3800.26	17258.4	2370.69	7.04234
1740	5444	565	55.112	0.0076987	-0.0869515	421.391	0.134982	3827.14	17480.2	2147.71	7.83547
1741	5442	1297	70.486	0.0177282	0.00320391	420.423	0.278143	323.538	13441.1	2618.66	8.68456
1742	4534	1141	73.3447	-0.0677021	0.0240086	420.391	0.261015	9187.35	4859.65	11778.4	7.63083
1743	4710	526	49.2977	0.00130869	0.00816741	420.939	0.261015	8930.49	4981.04	12081.5	6.7353
1744	4238	576	53.4963	0.0163762	-0.0206608	421.529	0.22376	8944.17	5356.02	12180.6	7.46524
1745	5536	1559	73.132	0.0109053	0.00978296	421.873	0.205306	8794.22	5452.02	12381.9	8.36809
1746	5294	378	43.394	0.0520157	0.0618922	423.725	0.245217	4630.11	3165.61	11731.9	7.17783
1747	3838	767	43.2022	0.0160865	-0.0385872	424.059	0.245217	4474.6	3208.29	11519.9	12.9173
1748	5688	1306	69.1791	-0.00473807	-0.00782449	426.271	0.342598	63.3987	3443.57	8301.95	8.9141
1749	3838	932	55.5651	-0.000793651	0.00449735	426.807	0.280774	510.614	3918.54	7939.96	15.3144
1750	4275	642	41.9457	-0.00122982	-0.00122982	426.55	0.342598	176.222	3600.54	8143.05	11.4967
1751	4039	275	58.309	0.0144355	-0.0472929	425.651	0.128575	10152.6	23802.7	5146.84	8.22925
1752	5755	81	24.2265	-0.0325295	-0.0325295	425.43	0.102762	10063.8	23435.5	4871.55	7.24619
1753	5430	884	63.403	0.0309086	-0.0706003	420.896	0.131595	2609.84	16698.9	2157.53	7.87657
1754	5895	1147	62.4819	-0.0194521	0.0242721	420.961	0.142347	2220.42	16608.8	1797.92	7.74866
1755	5865	1064	63.7734	0.0105375	0.00302271	419.933	0.28405	381.236	14217	701.921	7.78742
1756	5696	1309	67.2105	-0.109625	0.00148602	420.533	0.3	273.837	14369.4	1472.29	6.1913
1757	5010	410	52.9955	0.0105588	0.00451726	419.969	0.281689	263.698	14332.5	673.965	7.89153
1758	5093	667	52.4155	-0.00656649	-0.0147969	420.673	0.280926	162.74	13609.7	2740.35	9.2309
1759	4458	567	62.947	0.0391649	0.00624314	420.108	0.236085	1079.68	12727	3295.75	7.32901
1760	4943	861	63.7083	0.0244063	-0.0348529	420.335	0.23993	777.575	13024.8	3194.1	7.90447
1761	5277	895	53.2452	-0.0186844	0.0397518	420.389	0.227417	904.345	12918.8	3375.12	7.34494
1762	5285	658	63.375	0.00822966	0.0182397	421.674	0.218138	9083.65	5552.28	12095.4	7.74739
1763	4693	567	57.8289	-0.00401727	-0.0163629	422.962	0.269576	6677.76	4391.13	13376.6	7.54888
1764	4546	1411	60.4094	0.00404266	0.0106903	422.36	0.204908	6898.24	4211.32	13725.5	7.3349
1765	4257	167	31.2304	0.00776845	-0.0169229	424.212	0.245399	4294.36	3121.92	11364.6	9.76562
1766	4137	649	60.0119	0.0073248	0.00115196	424.549	0.241117	3562.28	2716.4	10794.5	8.80327
1767	5081	1569	71.4648	-0.0219967	0.0119539	424.767	0.241745	2687.93	2266.76	10223.5	8.63662
1768	6422	1144	66.0098	0.0256325	-0.0268366	425.035	0.235794	2700.87	2434.74	10124.1	13.6944
1769	4262	715	33.8771	0.0145013	9.79865e-05	426.837	0.432379	358.462	3785.52	7961.01	9.38621
1770	5548	322	56.0249	0.0497137	-0.0166444	423.067	0.0881612	9321.69	20276.1	4689.67	6.14831
1771	4442	63	23.1975	-0.0702501	-0.0239538	423.29	0.0881612	9459.18	20485.5	4520.82	5.89187
1772	3204	571	55.2529	-0.0310828	-0.0829346	423.263	0.0909147	9289.34	20415.9	4460.11	6.24347
1773	4739	1034	65.6709	-0.0204606	0.0536134	422.147	0.170332	8279.12	19228.3	5024.72	6.24488
1774	4605	423	36.2763	0.0404063	-0.0162031	422.414	0.124669	8460.23	19485.6	4866.53	7.88844
1775	5006	508	51.6998	0.0768312	0.0284773	422.816	0.0881612	9054.95	19994.9	4858.27	6.71451
1776	4622	29	20.0374	0.023798	0.0530378	423.038	0.0900864	8878.84	20114	4490.63	6.42556
1777	4783	611	52.6605	-0.00539167	0.0378182	423.193	0.0912996	9169.79	20327	4472.26	6.97619
1778	3953	88	29.8646	0.0693346	0.0379955	422.321	0.0901199	7449.91	19175.4	4178.09	7.79354
1779	3737	82	22.2906	0.0362559	0.0448029	422.143	0.096178	7093.29	18952.9	4110.72	7.25869
1780	5370	477	42.7145	-0.0386076	0.0319391	422.228	0.241795	8040.66	5032.01	13088.9	6.79187
1781	4593	868	29.2278	-0.000544081	0.0435476	422.34	0.238432	8234.04	5256.52	12948.2	7.39876
1782	4344	826	47.5975	0.00941794	0.0159337	422.231	0.252918	8133.69	5122.75	13019.1	7.5079
1783	4809	693	45.1732	0.0119819	0.0270115	421.971	0.176907	7211.09	4164.21	13728.5	7.93741
1784	5018	383	50.224	0.000133729	-0.0145635	422.528	0.243983	6945.98	4456.53	13564.7	8.03581
1785	4772	451	29.6677	-0.00167666	-0.00344033	422.264	0.189681	6540.93	3860.35	13388.8	7.71028
1786	3557	919	42.7675	-0.00625337	-0.00145227	422.536	0.204495	6200	3772.15	13084.1	7.31766
1787	5577	296	58.7908	-0.0357564	-0.0267029	423.617	0.289226	5888.92	4105.77	12609.8	6.84891
1788	5643	1700	72.1389	0.0884723	0.128193	423.648	0.239561	3850.72	2453.09	11293.3	6.19725
1789	4828	448	40.3004	0.00604846	-0.0114412	424.364	0.241116	3717.8	2734.68	10960.8	10.8662
1790	3852	218	27.5298	-0.000940246	-0.00731221	424.379	0.0474799	9579.78	22056.7	4712.7	6.37378
1791	4431	1273	44.2726	0.0869508	0.0715187	422.797	0.0901199	7005.26	19474.6	3440.24	9.86075
1792	5331	828	54.4159	0.0161776	0.209593	422.446	0.0901199	6900.18	19163	3719.85	6.12064
1793	5564	148	30.9762	0.0728765	-0.071568	422.634	0.0901199	6883.17	19323.9	3516.64	9.38516
1794	4327	1377	65.5882	-0.117343	0.0493232	419.152	0.23688	3100.8	15306.1	3067.36	6.50273
1795	3736	446	59.1725	0.0290163	-0.0744522	419.595	0.228924	3089.61	15696.8	3006.41	6.88588
1796	3856	447	33.0781	-0.016654	-0.00206363	419.559	0.178488	2599.5	15528.6	2525.53	6.78037
1797	5356	1407	67.6831	-0.00291564	0.0705842	420.422	0.165687	1691.8	15980.6	1529.15	6.99893
1798	5986	673	60.6072	0.0322059	-0.0452695	420.544	0.171195	2019.14	16173.3	1758.29	7.51446
1799	5631	380	51.2212	0.0358754	0.0331319	420.236	0.157494	1143.56	15618.7	1028.04	7.55995
1800	5265	753	62.7192	0.0194219	0.00273236	420.712	0.196725	1042.51	15923.1	811.563	9.83919
1801	5942	1132	73.8116	0.0212392	0.0171854	420.828	0.209452	483.754	15660.8	260.536	7.87534
1802	5529	65	18.5983	-0.0959836	0.167391	419.792	0.241795	1891.49	11987.3	3876.95	6.19382
1803	5879	592	51.5378	0.0125653	0.0125653	420.1	0.217859	1893.82	12057.8	4193.84	6.67174
1804	4706	913	70.7931	-0.0447874	0.137311	419.941	0.217859	1794.7	12096.6	3927.72	5.91889
1805	3896	720	34.398	0.0319956	-0.00426987	420.19	0.217859	1679.64	12249.2	4059.95	6.56256
1806	3441	950	54.2362	0.0360128	-0.00513944	420.532	0.185164	1861.43	12207.6	4528.65	7.00442
1807	5467	432	50.4043	0.0279289	-0.036445	420.619	0.202384	1691.07	12380.4	4484.33	7.84186
1808	5263	563	47.7415	0.0328426	0.0341654	420.488	0.16634	2072.44	12051.5	4713.65	7.56696
1809	4071	608	60.3691	0.000645373	0.0426207	419.43	0.220553	2612.71	11320.8	4312.38	7.04861
1810	3966	791	33.1557	-0.0412434	0.0772751	419.768	0.256955	2077.7	11828.4	4057.66	6.0619
1811	3822	687	40.0455	-0.0160805	-0.00990767	419.724	0.192085	2712.39	11331.5	4671.3	7.30071
1812	3190	168	52.408	0.0196726	-0.00358325	419.903	0.190829	2313.16	11685.2	4423.52	7.21694
1813	4338	457	68.3685	0.016436	-0.00516898	420.341	0.177291	2193.87	11918.9	4700.39	9.54123
1814	4697	8	7.40892	-0.00689038	-0.0328163	420.745	0.154217	2480.68	11842.4	5265.6	7.56821
1815	4663	376	42.8997	-0.00240884	0.0189155	422.038	0.225464	7761.46	4732.7	13306.2	7.89525
1816	5040	559	46.2667	0.0628258	-0.0921811	422.269	0.247861	7889.08	4962.93	13235.8	8.29207
1817	5255	454	63.0584	0.00795634	-0.00438934	422.885	0.281753	7475.91	4964.14	13661.1	8.90728
1818	5386	638	50.9803	0.00770548	0.00754088	421.465	0.153144	7534.19	4184.3	13436.1	8.11804
1819	4736	466	47.8734	0.00440946	0.014286	423.108	0.287035	7201.2	4897.08	13699.5	8.48763
1820	4891	1175	57.4027	0.123491	0.016674	423.887	0.250022	5323.9	3792.06	12136	8.6482
1821	3970	903	72.7878	0.0103896	-0.0255251	424.196	0.248826	4851.31	3568.1	11718.7	10.7859
1822	4696	94	18.0736	0.011911	-0.00219836	424.407	0.245383	4212.21	3168.15	11230.4	8.57546
1823	4199	1183	48.3141	0.0198221	-0.0337842	424.04	0.250936	1734.41	1600.31	9969.74	7.5634
1824	4069	1008	42.2823	-0.000258883	0.0221397	423.83	0.257339	1667.98	1558.95	9988.37	7.56309
1825	4119	1066	73.8671	0.0206972	0.00391973	425.402	0.271475	879.621	2452.68	9088.56	9.09525
1826	3924	344	65.0606	-0.0077969	0.00572456	422.616	0.08994	7703.09	19488.2	4060.37	6.79725
1827	3902	381	66.0189	-0.124613	0.180943	422.831	0.0888407	7978.71	19732.1	4053.06	5.92735
1828	5374	1155	70.6402	0.0286907	-0.00143272	422.866	0.0916286	7603.94	19683.5	3749.05	7.55507
1829	4699	1668	62.1926	0.0207371	0.181231	421.33	0.317897	1263.6	16426.9	577.726	6.94339
1830	5489	1223	62.4518	0.00231525	-0.00567313	420.75	0.298185	108.452	13863	2455.09	10.5527
1831	4773	694	45.1214	0.00860942	0.0209551	422.196	0.201957	8654.05	5526.96	12574.2	7.54576
1832	3365	164	37.9906	0.0112147	0.00335836	422.747	0.258709	8122.42	5407.14	13144.1	7.39538
1833	3599	1230	56.1513	0.0275659	-0.0341625	422.975	0.296948	7899.57	5229.8	13336.8	9.32747
1834	6083	1031	67.863	0.010841	-0.0103936	422.896	0.25953	8212.32	5548.97	13095	8.08914
1835	3733	908	51.4757	0.0066777	-0.0111549	422.977	0.271505	6519.88	4267.08	13262.9	7.4329
1836	5525	829	65.9318	0.0039189	-0.0701552	423.763	0.336678	6542.37	4703.54	13015.8	9.64465
1837	4455	735	46.2274	-0.00918227	0.0336645	423.457	0.296756	6310.43	4353.98	12958.6	7.37578
1838	4916	822	59.8306	0.135421	-0.247295	423.966	0.336678	6423.6	4705.54	12867.6	11.2901
1839	3239	119	31.0173	0.0830275	0.0875759	424.045	0.336678	5882.14	4316.2	12458.5	7.77531
1840	5509	227	36.2763	0.0106807	-0.001665	424.425	0.247232	4701.24	3577.99	11526.3	9.90232
1841	3600	894	43.9106	-0.00630885	0.0019216	424.73	0.246587	4256.71	3358.61	11139.9	8.49977
1842	5851	1220	61.3103	0.0355666	0.0490016	424.374	0.248442	2018.84	1756.64	10024	7.40203
1843	5741	540	52.7707	0.0123001	0.0764977	424.908	0.255269	1565.11	2055	9598.03	6.6571
1844	5262	734	57.7193	0.0410591	0.049701	425.446	0.264212	1201.82	2359.11	9241.64	8.02849
1845	5313	589	42.1536	0.0228152	-0.0389132	424.668	0.244836	2211.47	1995.99	10017.6	11.0185
1846	4065	920	42.6034	0.0122876	0.0176889	425.635	0.260992	1413.07	2453.45	9250.67	9.68834
1847	3190	496	58.9098	0.00496911	0.02143	426.005	0.267512	774.169	2729.24	8822.99	10.127
1848	3467	480	62.947	0.00557458	-0.0168721	424.837	0.271901	929.635	2288.29	9282.18	10.7948
1849	3896	596	38.7777	0.0299175	0.0185036	425.436	0.274908	594.252	2649.37	8944.57	8.23253
1850	5385	647	46.0464	0.000267328	-0.0194858	426.475	0.299584	239.233	3119	8417.39	12.1112
1851	4515	1030	39.6221	0.0853673	0.0737075	426.199	0.30884	118.902	3208.95	8424.82	7.58573
1852	4406	815	58.6679	0.15299	0.0295334	426.251	0.287937	126.484	3125.43	8434.65	7.29922
1853	3441	128	33.1864	-0.00748187	0.0485881	426.543	0.359042	157.18	3340.85	8263.64	9.72401
1854	3467	153	54.4078	-0.0107646	0.0633095	423.652	0.0723949	9331.15	21115.4	4938.36	6.1936
1855	3445	227	59.9417	-0.0872359	0.0182998	424.069	0.0384349	9454.94	21653.1	4803.79	6.62872
1856	3544	1000	49.5338	0.0167502	-0.110605	424.034	0.0407401	9625.36	21509.1	4628.6	6.68533
1857	4191	1297	69.3522	0.0316695	-0.0199178	424.431	0.0400015	9863.63	21937.6	4392.49	6.6128
1858	4642	442	41.2219	0.000169464	0.0742435	422.201	0.104729	6401.42	18850	3486.01	6.52613
1859	3700	848	57.5426	-0.101921	-0.0643904	422.193	0.109372	6090.7	18763.7	3201.04	6.57287
1860	5268	596	43.0478	0.043906	-0.0925138	422.551	0.10239	6443.13	19157.7	3263.4	7.58068
1861	3903	751	71.6469	0.0672721	-0.0530982	421.739	0.12046	5421.42	18203.5	2970.33	8.15401
1862	3975	1327	50.7511	-0.00526155	-0.00948508	422.143	0.118197	5629.82	18613.3	2810.29	7.39632
1863	4812	1046	42.0283	0.0308559	0.0199627	422.035	0.12046	5269.38	18425.3	2583.85	7.47889
1864	4297	845	62.465	-0.0510463	0.022822	420.646	0.202555	4783.45	17099.6	3375.97	6.82715
1865	3583	98	38.5662	0.0156352	0.0140249	421.646	0.126743	5074.65	18067.5	2729.29	8.11801
1866	4594	680	59.6416	0.0661113	-0.0257954	421.003	0.171817	4621.83	17389.7	2952.65	7.4369
1867	4524	863	52.6465	0.0249241	-0.089554	421.157	0.158181	4884.7	17567.3	3028.09	8.66409
1868	3489	310	43.2865	0.00939181	0.00939181	421.688	0.122907	4865.8	18033.7	2546.89	7.70911
1869	4456	1078	49.5789	0.00177962	0.0145111	420.158	0.260556	145.92	14852.8	352.784	8.15944
1870	4891	1353	53.9318	0.028015	-0.00116573	420.941	0.277547	362.318	15166.7	912.421	8.27073
1871	4864	1345	58.0166	0.0214496	-0.000772602	424.571	0.251932	4941	3834.84	11634.4	7.85118
1872	5823	984	66.0508	-0.107694	-0.0186289	424.614	0.0506073	9696.93	22340.3	4647.43	6.29266
1873	5604	157	23.1483	-0.0167523	-0.00665132	424.888	0.0493515	9939.67	22591.1	4432.57	6.38885
1874	5913	710	53.3242	0.00230513	0.0703732	421.064	0.133581	2903.78	16920.1	2106.3	6.72553
1875	3945	688	37.3932	0.0170094	-0.0529495	421.469	0.133223	2881.5	17241.6	1703.05	7.68909
1876	3441	983	55.2731	-0.0190136	0.0108218	421.595	0.132035	2480.44	17194.3	1447.7	7.43794
1877	5011	554	65.6113	-0.0799836	0.0187819	419.792	0.246095	1737.45	12112.1	3703.11	6.22644
1878	3786	191	42.4877	0.0172046	0.0295503	420.27	0.240228	1138.94	12697.3	3463.13	7.76945
1879	4857	586	43.045	-0.0123765	0.0381286	420.424	0.219367	1099.79	12768.8	3658.65	7.32104
1880	3190	340	52.1473	0.0490641	0.00205558	420.644	0.248582	715.796	13135.1	3421.04	8.11335
1881	3941	1420	73.5665	0.0106788	0.0254936	420.857	0.249974	699.354	13191	3603.85	7.16488
1882	4706	1229	61.104	0.0156097	0.0140665	420.97	0.249236	749.098	13179.2	3752.77	7.40899
1883	3457	329	52.8711	0.00601389	-0.0186775	421.646	0.253515	10191.3	6619.67	10824	7.07384
1884	5373	817	62.784	0.0228211	0.006718	422.065	0.250842	9990.14	6927.89	10949.5	7.79389
1885	4685	551	58.996	-0.0943606	-0.00681848	420.934	0.263396	10359.7	6246.49	10622.3	7.00533
1886	4833	724	51.9322	-0.0344228	-0.00118446	421.461	0.274051	10223.1	6548.54	10803.4	8.10881
1887	4447	819	32.9013	0.0216306	-0.0140347	422.109	0.254739	10220.8	6677.43	11076.4	8.77537
1888	5170	566	47.2726	0.0265078	0.0561374	422.676	0.248108	8732.23	5836.83	12618	7.65766
1889	5076	599	40.1649	0.00199548	-0.0029428	423.654	0.304246	7722.95	5566.88	13596.3	9.46171
1890	3712	58	24.5951	0.000634475	-0.0112364	423.217	0.285158	8507.26	5954.15	12951.9	8.44231
1891	4710	1807	70.0846	-0.0104238	-0.0165967	424.159	0.336678	6393.75	4771.17	12787	8.73043
1892	4649	622	29.2684	0.000997779	0.00922823	423.73	0.328718	6822.99	4893.18	13238	8.43992
1893	3653	631	36.3379	0.0856877	0.0814142	423.994	0.241107	3359.23	2243.13	10888.7	7.92896
1894	5757	561	68.993	0.00849901	0.00424188	424.956	0.236496	3218.7	2678.92	10447.2	8.88896
1895	5892	383	34.0438	0.011783	0.00149492	425.136	0.234644	2961.32	2629.44	10226.5	9.04146
1896	5184	795	40.6207	0.000817134	0.00193947	426.79	0.301609	336.129	3225.38	8313.52	10.9326
1897	3757	1011	69.46	0.0377592	-0.0128581	424.757	0.040012	9983.16	22376.6	4308.82	7.2751
1898	3789	66	22.97	0.0268613	0.0327658	424.81	0.0404552	10190.1	22336.3	4076.05	6.7271
1899	4268	925	64.7868	-0.0435269	0.16292	424.254	0.0761903	9951.46	21633.6	4314.75	6.22902
1900	3992	261	29.8401	-0.134277	0.0209255	424.102	0.0956934	9904.87	21468.8	4379.3	6.23004
1901	4800	1184	52.3819	0.139495	-0.0312865	424.431	0.075105	10176.2	21795.6	4092.83	7.13428
1902	5847	349	32.7541	-0.00492095	-0.0657979	423.365	0.0881612	9313.11	20747.7	4914.79	6.63206
1903	5752	573	65.5324	-0.102363	0.132205	423.4	0.0881612	9636.44	20654.6	4512.47	6.64479
1904	6395	1105	71.5716	0.0173996	0.0681051	423.836	0.0936669	9800.99	21144.2	4440.07	6.51631
1905	4009	948	53.1257	0.0955121	-0.0054004	423.889	0.0975764	9906.08	21101.4	4170.14	7.03648
1906	3311	616	57.7728	0.048373	-0.00213202	423.042	0.0901199	7478.4	19809.9	3470.92	7.13048
1907	3824	740	60.9858	0.125226	0.11288	423.061	0.0901199	7102.48	19730	3215.06	7.85579
1908	4809	1230	52.8605	-0.00863461	0.0146043	420.804	0.297941	538.104	14445.8	1774.55	7.39892
1909	4648	315	30.5311	0.0233524	0.00714873	421.12	0.297107	793.855	14674.3	1945.49	7.7631
1910	5862	1169	62.5799	-0.0213536	-0.00123469	421.59	0.246501	9542.86	7092.4	10289.5	7.80421
1911	3825	242	54.4812	0.000697012	0.00810442	422.067	0.229396	9356.68	7385.9	10399.5	7.4057
1912	5294	671	51.7262	-0.000710088	-0.0124679	423.783	0.322802	7029.89	5101.2	13361.2	9.26775
1913	4707	623	45.4943	-0.0248169	-0.0759633	423.183	0.0975764	8489.95	20156.4	4088.16	6.03815
1914	4915	1238	47.9255	-0.0369958	-0.0246501	423.328	0.0975764	8198.65	20189.5	3749.61	6.83125
1915	4533	724	56.0252	0.029376	0.0486996	423.484	0.0975764	8660.42	20457.6	3892.19	6.41696
1916	5697	454	51.7078	0.0166539	0.0475181	420.951	0.158093	4347.72	17240	2857.41	6.96767
1917	5001	1385	67.5684	0.00842121	-0.0119966	421.373	0.12574	4357.98	17627.3	2462.53	7.57749
1918	4794	822	45.1467	-0.00046179	0.0612666	421.754	0.132988	4310.56	17929	2086.1	6.78977
1919	3748	180	31.2349	0.00633016	0.00221494	421.739	0.124836	4701.92	18039.4	2370.61	8.12252
1920	4139	1178	43.1874	-0.00486292	-0.0010049	421.957	0.130511	4623.34	18197	2119.37	8.37717
1921	4736	1011	56.4919	-0.000432582	-0.0143215	422.348	0.130337	4879.46	18575.2	1980.77	8.51793
1922	5474	804	61.3368	0.00665204	0.0860171	421.337	0.211574	1722.31	16665.4	1073.73	7.33879
1923	5723	1273	64.3158	0.0306263	-0.0247006	421.696	0.162487	2143.17	17109.7	1146.04	7.44181
1924	5713	1284	59.471	-0.0656931	0.0330723	421.2	0.222581	630.403	15922.1	109.453	6.76275
1925	4348	742	61.4017	0.00421674	-0.0548661	421.376	0.228585	721.599	15959.9	263.935	9.34217
1926	3873	127	26.5126	-0.00463674	-0.0133816	420.96	0.285969	142.272	13676.3	3024.76	8.96532
1927	5504	918	60.4601	0.0026335	-0.00508254	421.045	0.289994	106.22	13910.4	2826.67	8.52133
1928	4877	647	52.4695	0.0196845	-0.00588866	421.308	0.263712	308.499	13615.3	3571.71	8.34374
1929	4443	777	43.4253	0.0209195	0.00308684	422.671	0.23838	9502.56	7474	10897.7	7.26759
1930	3382	845	63.0543	0.0138367	-0.0218286	424.233	0.328809	6980.05	5280.78	13187.1	11.5701
1931	5753	741	57.2454	-0.00736251	-0.129276	423.881	0.31904	6091.53	4403.08	12657.8	8.25947
1932	5195	566	51.828	0.0359793	-0.167724	424.253	0.336678	6196	4678.19	12602.4	11.7989
1933	3863	49	30.3594	-0.0153183	-0.00571608	424.475	0.336678	6153.01	4747.85	12502.9	7.11098
1934	4106	650	29.6611	-0.000541762	0.00563108	424.778	0.242339	2514.04	2179.35	10130.3	8.85657
1935	3617	342	42.8413	0.0128168	-0.00865392	425.565	0.231146	2785.69	2774.37	9964.78	9.64405
1936	4671	922	38.1962	-0.0050196	-0.000904374	425.239	0.235779	2221.52	2327.27	9810.32	8.99135
1937	4607	1095	46.0134	0.00925309	-0.00152764	426.698	0.229042	2613.45	3321.46	9412.55	8.1622
1938	5710	955	66.1364	0.0433246	0.00723722	426.22	0.228607	2093.92	2882.83	9328.13	9.62887
1939	5301	262	55.8106	2.67499e-05	0.00700474	426.806	0.265978	875.045	3100.31	8534.79	9.04121
1940	4958	1175	62.201	-0.0575243	0.147649	422.809	0.0985603	6585.42	19407.6	3140.56	6.49817
1941	4426	814	52.6276	0.071325	-0.176823	422.991	0.100935	6534.37	19546.7	2922.25	7.35653
1942	5679	966	71.4103	0.00823788	0.0151823	420.472	0.281925	243.256	14597	1100.19	7.19241
1943	4392	404	37.9777	-0.00146169	-0.0035193	420.543	0.281006	315.687	14737.6	976.655	8.0081
1944	4718	841	57.7547	0.0111842	-0.000103255	420.492	0.27874	336.278	14864.7	840.481	7.91964
1945	5320	871	62.4845	0.0116582	0.00342777	421.424	0.278257	926.864	15126.7	1679.16	6.66362
1946	4438	603	26.9854	-0.00693447	0.0208433	421.258	0.277668	789.343	15145.9	1491.05	7.86846
1947	3441	649	61.7054	-0.0782948	0.119236	421.652	0.259225	1119.02	15223.6	1816.29	6.29154
1948	4647	923	61.1941	-0.0396026	-0.0283305	421.423	0.213961	8904.15	7531.64	9699.03	7.38744
1949	5500	532	68.5832	-0.13914	0.0275265	420.943	0.206888	8545.84	7602.79	9187.99	6.89029
1950	3873	282	48.7351	0.0141433	-0.0163093	421.546	0.212741	8656.96	7781.41	9565.61	6.88719
1951	4430	115	30.6481	0.00236637	0.0244122	421.984	0.226706	8962.89	7678.16	10086.3	7.96288
1952	6302	894	61.5296	0.0058787	-0.0095534	422.608	0.23838	8663.07	8082.45	10202.4	10.3844
1953	5348	942	57.0497	-0.0110604	-0.00180112	421.737	0.220957	9169.93	7437.18	10102.2	7.79058
1954	3688	532	61.6196	0.0243589	-0.0479515	424.055	0.299494	7785.9	5825.28	13668.1	10.4647
1955	5158	1196	44.9644	0.0108493	0.00732194	424.525	0.336678	6411.73	4974.34	12675.8	9.93166
1956	4571	262	42.7057	0.00278125	-0.00956443	424.611	0.336678	6539.67	5125.37	12736.6	9.4609
1957	4736	658	52.312	-0.00457212	0.00612746	424.858	0.257255	5199.63	4189.17	11701.4	7.97249
1958	4725	328	57.4067	-0.00722803	0.00511765	425.286	0.246693	1997.23	2299.96	9676.75	8.86014
1959	3544	694	52.4717	0.00691939	-0.00336867	425.899	0.264374	1755.58	2641.45	9282.25	10.7386
1960	4999	593	43.6046	-0.0354496	-0.00499696	422.183	0.132678	4379.19	18284.7	1740.17	6.89087
1961	5542	37	18.4815	-0.0400398	-0.112468	422.093	0.134123	4172.23	18167.7	1654.71	7.46092
1962	3784	869	71.0204	-0.0360104	0.042812	421.606	0.134764	5913.22	9833.98	7751.24	6.80172
1963	3708	485	51.8906	-0.0135222	0.0306623	421.781	0.134894	6317.5	9626.83	8091.18	6.99242
1964	3842	492	62.1007	0.053289	-0.0547357	422.018	0.135833	6113.48	9905.61	8122.56	7.66351
1965	3790	698	45.3347	-0.0243988	0.0308883	421.495	0.193695	6904	9066.16	8308.71	7.00568
1966	4379	971	47.228	0.00425998	-0.000963189	421.917	0.18741	6906.52	9259.43	8531.17	7.51836
1967	4563	1105	54.7917	0.0545954	-0.0277091	422.65	0.250741	9757.91	6526.98	11743	8.85931
1968	3311	508	60.3631	0.00271652	0.024503	422.448	0.232184	9676.05	6438.51	11798.5	7.82679
1969	4726	1369	58.4003	0.0952965	-0.143387	421.021	0.245225	10242.4	6045.79	10941.5	7.80714
1970	4320	849	47.0999	-0.0310215	0.0020874	420.955	0.240429	9829.35	5699.55	11290.8	7.50508
1971	4596	929	64.0862	0.0685056	-0.129025	421.353	0.234237	9960.11	6018.92	11255.2	8.54326
1972	4402	1660	49.8991	0.00063602	-0.00818232	421.557	0.22376	9256.68	5526.95	11888.2	7.94226
1973	5068	841	40.8375	0.00339315	-0.00657836	421.976	0.233235	9352.86	5929.32	11946.7	9.12097
1974	3887	144	38.4117	0.0331552	-0.0498352	422.644	0.244408	9518.16	6395.39	11969.6	8.55637
1975	3311	703	44.2936	0.00474206	-0.00570428	424.608	0.330933	5661.42	4427.92	12109	9.10369
1976	4922	708	52.2315	-0.00471284	-0.00965112	425	0.336678	5699.76	4667.99	11988.1	10.366
1977	5263	678	63.698	0.0448615	-0.0199533	425.833	0.227876	2437.57	2756.54	9679.09	11.0876
1978	3811	680	63.7883	0.015944	-0.002163	425.92	0.230734	2722.53	2948.47	9785.13	7.81074
1979	3495	739	48.8789	0.0039278	-0.00430265	427.477	0.341835	443.848	3522.25	8048.56	9.96941
1980	4527	417	44.6756	0.001395	0.00532317	427.271	0.328573	817.192	3358.1	8292.33	9.61477
1981	3861	262	28.7515	-0.00190241	-0.0191864	427.685	0.359849	148.034	3703.59	7837.09	10.9952
1982	3761	607	45.7547	-0.00117236	-0.00220117	427.467	0.360539	197.704	3683.74	7860.75	10.321
1983	6543	1386	72.7343	0.0105729	0.0192875	425.81	0.118355	10263.4	24008.5	5220.12	7.41493
1984	3795	309	42.8889	0.000469908	-0.0250729	426.398	0.117736	10836.7	24627.2	5008.02	7.97107
1985	3876	45	15.7302	0.0205872	0.00824151	425.973	0.117421	10456.7	24108.2	4966.24	7.91475
1986	3970	1054	44.0209	0.092713	-0.00111411	423.348	0.104974	7191.45	19989.8	2973.86	6.11612
1987	5248	452	50.0394	0.102018	0.0291788	423.46	0.115469	7396.5	20143	2978.23	9.75591
1988	3374	997	52.5523	-0.0355374	-4.36206e-05	422.478	0.115335	5743.12	18933.7	2636.52	7.30061
1989	5748	1310	73.0423	-0.0485981	-0.00333058	422.714	0.112361	5941.13	19190.5	2626.76	6.59739
1990	5357	357	68.6054	0.0286407	-0.0529482	422.735	0.116363	5638.76	19109.8	2328.95	7.29219
1991	3872	711	37.5079	0.0923043	0.0204749	421.818	0.249486	1273.76	16573.7	102.553	8.06071
1992	4208	490	56.8722	0.0103051	0.0473421	421.58	0.311864	1235.23	16489.1	350.523	10.3408
1993	4443	581	51.1756	0.00272768	0.0673051	420.962	0.22097	1571.59	12578.5	4596.55	6.95739
1994	3186	948	65.1261	0.0239708	-0.0223255	421.155	0.232019	1437.09	12767.6	4602.98	7.78212
1995	4646	377	54.5437	0.0577867	0.0248649	421.146	0.17047	2114.03	12276.8	5237.74	8.24313
1996	6823	966	59.2818	0.0218826	0.00747931	421.458	0.186298	1811.65	12627.5	5132.52	9.30741
1997	5669	810	67.6505	9.75126e-05	-0.00916175	424.885	0.336678	6405.8	5147.08	12550.4	8.84484
1998	4643	948	44.2896	0.0271046	-0.0407967	425.556	0.24671	4329.86	3829.79	10871.7	10.3077
[truncated: 61 more rows]
